# Supplementary material for: TargetMine, an Integrated Data Warehouse for Candidate Gene Prioritisation and Target Discovery
Source: PLoS One. 2011 Mar 8;6(3):e17844. doi: 10.1371/journal.pone.0017844 (PMC3050930; doi:10.1371/journal.pone.0017844)
Supplement: Table S2 — Detailed benchmarking results for candidate gene prioritisation with TargetMine using 19 sets of known disease-associated genes. (XLS) [file pone.0017844.s002.xls]

## Sheet: readme
Table S2: Deatiled benchmarking results for candidate gene prioritisation with TargetMine using 19 sets of known disease-associated genes
abbre.	disease name	gene num.
athe	Atherosclerosis	35
auti	Autism	41
cerv	Cervical carcinoma	38
cirr	Cirrhosis	30
enca	Endometrial carcinoma	33
endo	Endometriosis	43
epil	Epilepsy	36
grav	Grave's disease	36
hych	Hypercholesterolaemia	32
inbd	Inflammatory bowel disease (IBD)	36
isch	Ischaemic stroke	44
lymp	Lymphoma	42
migr	Migraine	33
myis	Myocardial ischemia	39
neur	Neural tube defects	38
oste	Osteoarthritis	41
panc	Pancreatitis	31
sysc	Systemic scleroderma	31
ulco	Ulcerative colitis	34
Description of table header
n	top n association(s)
KEGG	number of KEGG associations
GO	number of GO associations
OMIM	number of OMIM associations
Union	union number of KEGG, GO and OMIM associations
Intersect	intersect number of KEGG, GO and OMIM associations
TP	true positive
FP	false positive
FN	false negative
TN	true negative
Sensitivity	sensitivity
Precision	precision
F-score	F-score (F-measure)
NOTE: The analysis was base on TargetMine build 20101102, released on Nov, 2nd.

## Sheet: athe
Test1						Union				Intersect				KEGG				GO				OMIM				Union			Intersect			KEGG			GO			OMIM				Union			Intersect			KEGG
n	KEGG	GO	OMIM	Union	Intersect	TP	FP	FN	TN	TP	FP	FN	TN	TP	FP	FN	TN	TP	FP	FN	TN	TP	FP	FN	TN	Sensitivity	Precision	F-score	Sensitivity	Precision	F-score	Sensitivity	Precision	F-score	Sensitivity	Precision	F-score	Sensitivity	Precision	F-score		Sensitivity (S)	Precision (P)	F-score (F)	Sensitivity (S)	Precision (P)	F-score (F)	Sensitivity (S)	Precision (P)
1	5	9	4	14	0	14	0	21	70	0	0	35	70	5	0	30	70	9	0	26	70	4	0	31	70	0.4	1	0.571429	0	N/A	N/A	0.142857	1	0.25	0.257143	1	0.409091	0.114286	1	0.205128		0.4	0.986667	0.569143	0			0.142857	0.966667
2	8	11	6	15	2	15	0	20	70	2	0	33	70	8	0	27	70	11	0	24	70	6	0	29	70	0.428571	1	0.6	0.0571429	1	0.108108	0.228571	1	0.372093	0.314286	1	0.478261	0.171429	1	0.292683		0.457143	0.961985	0.613107	0.0571429	1	0.108108	0.228571	0.968889
3	9	14	8	19	3	19	0	16	70	3	0	32	70	9	0	26	70	14	0	21	70	8	0	27	70	0.542857	1	0.703704	0.0857143	1	0.157895	0.257143	1	0.409091	0.4	1	0.571429	0.228571	1	0.372093		0.548571	0.957013	0.693436	0.08	1	0.147937	0.254286	0.971818
4	11	14	8	21	3	21	0	14	70	3	0	32	70	11	0	24	70	14	0	21	70	8	0	27	70	0.6	1	0.75	0.0857143	1	0.157895	0.314286	1	0.478261	0.4	1	0.571429	0.228571	1	0.372093		0.617143	0.954516	0.746294	0.0857143	1	0.157639	0.311429	0.977473
5	11	15	22	28	6	26	2	9	68	6	0	29	70	11	0	24	70	15	0	20	70	20	2	15	68	0.742857	0.928571	0.825397	0.171429	1	0.292683	0.314286	1	0.478261	0.428571	1	0.6	0.571429	0.909091	0.701754		0.768571	0.863686	0.812072	0.162857	1	0.27829	0.334286	0.95478
6	11	22	22	31	6	27	4	8	66	6	0	29	70	11	0	24	70	20	2	15	68	20	2	15	68	0.771429	0.870968	0.818182	0.171429	1	0.292683	0.314286	1	0.478261	0.571429	0.909091	0.701754	0.571429	0.909091	0.701754		0.774286	0.855937	0.811965	0.168571	1	0.286421	0.34	0.955971
7	11	22	22	31	6	27	4	8	66	6	0	29	70	11	0	24	70	20	2	15	68	20	2	15	68	0.771429	0.870968	0.818182	0.171429	1	0.292683	0.314286	1	0.478261	0.571429	0.909091	0.701754	0.571429	0.909091	0.701754		0.785714	0.848221	0.814044	0.177143	1	0.298616	0.345714	0.956755
8	11	24	22	31	7	27	4	8	66	7	0	28	70	11	0	24	70	22	2	13	68	20	2	15	68	0.771429	0.870968	0.818182	0.2	1	0.333333	0.314286	1	0.478261	0.628571	0.916667	0.745763	0.571429	0.909091	0.701754		0.785714	0.848221	0.814044	0.182857	1	0.306746	0.345714	0.956755
9	11	25	22	31	7	27	4	8	66	7	0	28	70	11	0	24	70	23	2	12	68	20	2	15	68	0.771429	0.870968	0.818182	0.2	1	0.333333	0.314286	1	0.478261	0.657143	0.92	0.766667	0.571429	0.909091	0.701754		0.788571	0.842993	0.813114	0.191429	1	0.319476	0.345714	0.956755
10	11	25	22	31	7	27	4	8	66	7	0	28	70	11	0	24	70	23	2	12	68	20	2	15	68	0.771429	0.870968	0.818182	0.2	1	0.333333	0.314286	1	0.478261	0.657143	0.92	0.766667	0.571429	0.909091	0.701754		0.791429	0.843369	0.814679	0.191429	1	0.319476	0.348571	0.957082
Test2																										Union			Intersect			KEGG			GO			OMIM
n	KEGG	GO	OMIM	Union	Intersect	TP	FP	FN	TN	TP	FP	FN	TN	TP	FP	FN	TN	TP	FP	FN	TN	TP	FP	FN	TN	Sensitivity	Precision	F-score	Sensitivity	Precision	F-score	Sensitivity	Precision	F-score	Sensitivity	Precision	F-score	Sensitivity	Precision	F-score		Stdev (S)	Stdev (P)	Stdev (F)	Stdev (S)	Stdev (P)	Stdev (F)	Stdev (S)	Stdev (P)
1	5	9	4	14	0	14	0	21	70	0	0	35	70	5	0	30	70	9	0	26	70	4	0	31	70	0.4	1	0.571429	0	N/A	N/A	0.142857	1	0.25	0.257143	1	0.409091	0.114286	1	0.205128		5.85139e-17	0.0281091	0.00481871	0			2.92569e-17	0.0702728
2	8	11	7	16	2	16	0	19	70	2	0	33	70	8	0	27	70	11	0	24	70	7	0	28	70	0.457143	1	0.627451	0.0571429	1	0.108108	0.228571	1	0.372093	0.314286	1	0.478261	0.2	1	0.333333		0.0808122	0.0693589	0.0457993	7.31424e-18	0	1.46285e-17	2.92569e-17	0.068853
3	9	14	7	19	2	19	0	16	70	2	0	33	70	9	0	26	70	14	0	21	70	7	0	28	70	0.542857	1	0.703704	0.0571429	1	0.108108	0.257143	1	0.409091	0.4	1	0.571429	0.2	1	0.333333		0.0552052	0.0726792	0.0299941	0.0120468	0	0.0209919	0.00903508	0.0624639
4	11	14	8	21	3	21	0	14	70	3	0	32	70	11	0	24	70	14	0	21	70	8	0	27	70	0.6	1	0.75	0.0857143	1	0.157895	0.314286	1	0.478261	0.4	1	0.571429	0.228571	1	0.372093		0.0385685	0.0775382	0.0115406	0.0134687	0	0.0228742	0.0342063	0.0513115
5	11	19	24	31	6	26	5	9	65	6	0	29	70	11	0	24	70	18	1	17	69	20	4	15	66	0.742857	0.83871	0.787879	0.171429	1	0.292683	0.314286	1	0.478261	0.514286	0.947368	0.666667	0.571429	0.833333	0.677966		0.0284123	0.0590207	0.02912	0.0382141	0	0.0611455	0.0486554	0.053363
6	11	20	24	31	7	26	5	9	65	7	0	28	70	11	0	24	70	19	1	16	69	20	4	15	66	0.742857	0.83871	0.787879	0.2	1	0.333333	0.314286	1	0.478261	0.542857	0.95	0.690909	0.571429	0.833333	0.677966		0.025017	0.055495	0.0275001	0.0414039	0	0.0655176	0.0493954	0.0525447
7	11	20	24	31	7	26	5	9	65	7	0	28	70	11	0	24	70	19	1	16	69	20	4	15	66	0.742857	0.83871	0.787879	0.2	1	0.333333	0.314286	1	0.478261	0.542857	0.95	0.690909	0.571429	0.833333	0.677966		0.0409635	0.0604311	0.0319072	0.0442627	0	0.0696265	0.0593999	0.0522269
8	11	20	24	31	7	26	5	9	65	7	0	28	70	11	0	24	70	19	1	16	69	20	4	15	66	0.742857	0.83871	0.787879	0.2	1	0.333333	0.314286	1	0.478261	0.542857	0.95	0.690909	0.571429	0.833333	0.677966		0.0409635	0.0604311	0.0319072	0.0450749	0	0.0709537	0.0593999	0.0522269
9	11	20	24	31	7	26	5	9	65	7	0	28	70	11	0	24	70	19	1	16	69	20	4	15	66	0.742857	0.83871	0.787879	0.2	1	0.333333	0.314286	1	0.478261	0.542857	0.95	0.690909	0.571429	0.833333	0.677966		0.0470441	0.0551947	0.0315748	0.0405182	0	0.0610242	0.0593999	0.0522269
10	11	21	24	31	7	26	5	9	65	7	0	28	70	11	0	24	70	20	1	15	69	20	4	15	66	0.742857	0.83871	0.787879	0.2	1	0.333333	0.314286	1	0.478261	0.571429	0.952381	0.714286	0.571429	0.833333	0.677966		0.0539589	0.0553441	0.0350793	0.0405182	0	0.0610242	0.0657074	0.0521287
Test3																										Union			Intersect			KEGG			GO			OMIM				# Average of 10 repeats
n	KEGG	GO	OMIM	Union	Intersect	TP	FP	FN	TN	TP	FP	FN	TN	TP	FP	FN	TN	TP	FP	FN	TN	TP	FP	FN	TN	Sensitivity	Precision	F-score	Sensitivity	Precision	F-score	Sensitivity	Precision	F-score	Sensitivity	Precision	F-score	Sensitivity	Precision	F-score
1	5	9	4	14	0	14	0	21	70	0	0	35	70	5	0	30	70	9	0	26	70	4	0	31	70	0.4	1	0.571429	0	N/A	N/A	0.142857	1	0.25	0.257143	1	0.409091	0.114286	1	0.205128
2	8	11	6	15	2	15	0	20	70	2	0	33	70	8	0	27	70	11	0	24	70	6	0	29	70	0.428571	1	0.6	0.0571429	1	0.108108	0.228571	1	0.372093	0.314286	1	0.478261	0.171429	1	0.292683
3	9	14	8	19	3	19	0	16	70	3	0	32	70	9	0	26	70	14	0	21	70	8	0	27	70	0.542857	1	0.703704	0.0857143	1	0.157895	0.257143	1	0.409091	0.4	1	0.571429	0.228571	1	0.372093
4	11	14	8	21	3	21	0	14	70	3	0	32	70	11	0	24	70	14	0	21	70	8	0	27	70	0.6	1	0.75	0.0857143	1	0.157895	0.314286	1	0.478261	0.4	1	0.571429	0.228571	1	0.372093
5	15	16	22	33	6	29	4	6	66	6	0	29	70	14	1	21	69	15	1	20	69	20	2	15	68	0.828571	0.878788	0.852941	0.171429	1	0.292683	0.4	0.933333	0.56	0.428571	0.9375	0.588235	0.571429	0.909091	0.701754
6	15	16	22	33	6	29	4	6	66	6	0	29	70	14	1	21	69	15	1	20	69	20	2	15	68	0.828571	0.878788	0.852941	0.171429	1	0.292683	0.4	0.933333	0.56	0.428571	0.9375	0.588235	0.571429	0.909091	0.701754
7	17	17	22	34	7	30	4	5	66	7	0	28	70	16	1	19	69	16	1	19	69	20	2	15	68	0.857143	0.882353	0.869565	0.2	1	0.333333	0.457143	0.941176	0.615385	0.457143	0.941176	0.615385	0.571429	0.909091	0.701754
8	17	17	22	34	7	30	4	5	66	7	0	28	70	16	1	19	69	16	1	19	69	20	2	15	68	0.857143	0.882353	0.869565	0.2	1	0.333333	0.457143	0.941176	0.615385	0.457143	0.941176	0.615385	0.571429	0.909091	0.701754
9	17	23	22	36	7	31	5	4	65	7	0	28	70	16	1	19	69	21	2	14	68	20	2	15	68	0.885714	0.861111	0.873239	0.2	1	0.333333	0.457143	0.941176	0.615385	0.6	0.913043	0.724138	0.571429	0.909091	0.701754
10	18	24	22	37	7	32	5	3	65	7	0	28	70	17	1	18	69	22	2	13	68	20	2	15	68	0.914286	0.864865	0.888889	0.2	1	0.333333	0.485714	0.944444	0.641509	0.628571	0.916667	0.745763	0.571429	0.909091	0.701754
Test4																										Union			Intersect			KEGG			GO			OMIM
n	KEGG	GO	OMIM	Union	Intersect	TP	FP	FN	TN	TP	FP	FN	TN	TP	FP	FN	TN	TP	FP	FN	TN	TP	FP	FN	TN	Sensitivity	Precision	F-score	Sensitivity	Precision	F-score	Sensitivity	Precision	F-score	Sensitivity	Precision	F-score	Sensitivity	Precision	F-score
1	5	9	4	14	0	14	0	21	70	0	0	35	70	5	0	30	70	9	0	26	70	4	0	31	70	0.4	1	0.571429	0	N/A	N/A	0.142857	1	0.25	0.257143	1	0.409091	0.114286	1	0.205128
2	8	11	6	15	2	15	0	20	70	2	0	33	70	8	0	27	70	11	0	24	70	6	0	29	70	0.428571	1	0.6	0.0571429	1	0.108108	0.228571	1	0.372093	0.314286	1	0.478261	0.171429	1	0.292683
3	9	14	8	19	3	19	0	16	70	3	0	32	70	9	0	26	70	14	0	21	70	8	0	27	70	0.542857	1	0.703704	0.0857143	1	0.157895	0.257143	1	0.409091	0.4	1	0.571429	0.228571	1	0.372093
4	11	14	8	21	3	21	0	14	70	3	0	32	70	11	0	24	70	14	0	21	70	8	0	27	70	0.6	1	0.75	0.0857143	1	0.157895	0.314286	1	0.478261	0.4	1	0.571429	0.228571	1	0.372093
5	13	19	23	30	6	27	3	8	67	6	0	29	70	13	0	22	70	18	1	17	69	20	3	15	67	0.771429	0.9	0.830769	0.171429	1	0.292683	0.371429	1	0.541667	0.514286	0.947368	0.666667	0.571429	0.869565	0.689655
6	13	19	23	30	6	27	3	8	67	6	0	29	70	13	0	22	70	18	1	17	69	20	3	15	67	0.771429	0.9	0.830769	0.171429	1	0.292683	0.371429	1	0.541667	0.514286	0.947368	0.666667	0.571429	0.869565	0.689655
7	13	20	23	30	7	27	3	8	67	7	0	28	70	13	0	22	70	19	1	16	69	20	3	15	67	0.771429	0.9	0.830769	0.2	1	0.333333	0.371429	1	0.541667	0.542857	0.95	0.690909	0.571429	0.869565	0.689655
8	13	20	23	30	7	27	3	8	67	7	0	28	70	13	0	22	70	19	1	16	69	20	3	15	67	0.771429	0.9	0.830769	0.2	1	0.333333	0.371429	1	0.541667	0.542857	0.95	0.690909	0.571429	0.869565	0.689655
9	13	20	23	30	7	27	3	8	67	7	0	28	70	13	0	22	70	19	1	16	69	20	3	15	67	0.771429	0.9	0.830769	0.2	1	0.333333	0.371429	1	0.541667	0.542857	0.95	0.690909	0.571429	0.869565	0.689655
10	13	20	23	30	7	27	3	8	67	7	0	28	70	13	0	22	70	19	1	16	69	20	3	15	67	0.771429	0.9	0.830769	0.2	1	0.333333	0.371429	1	0.541667	0.542857	0.95	0.690909	0.571429	0.869565	0.689655
Test5																										Union			Intersect			KEGG			GO			OMIM
n	KEGG	GO	OMIM	Union	Intersect	TP	FP	FN	TN	TP	FP	FN	TN	TP	FP	FN	TN	TP	FP	FN	TN	TP	FP	FN	TN	Sensitivity	Precision	F-score	Sensitivity	Precision	F-score	Sensitivity	Precision	F-score	Sensitivity	Precision	F-score	Sensitivity	Precision	F-score
1	5	9	4	14	0	14	0	21	70	0	0	35	70	5	0	30	70	9	0	26	70	4	0	31	70	0.4	1	0.571429	0	N/A	N/A	0.142857	1	0.25	0.257143	1	0.409091	0.114286	1	0.205128
2	8	11	6	15	2	15	0	20	70	2	0	33	70	8	0	27	70	11	0	24	70	6	0	29	70	0.428571	1	0.6	0.0571429	1	0.108108	0.228571	1	0.372093	0.314286	1	0.478261	0.171429	1	0.292683
3	9	14	8	19	3	19	0	16	70	3	0	32	70	9	0	26	70	14	0	21	70	8	0	27	70	0.542857	1	0.703704	0.0857143	1	0.157895	0.257143	1	0.409091	0.4	1	0.571429	0.228571	1	0.372093
4	11	14	8	21	3	21	0	14	70	3	0	32	70	11	0	24	70	14	0	21	70	8	0	27	70	0.6	1	0.75	0.0857143	1	0.157895	0.314286	1	0.478261	0.4	1	0.571429	0.228571	1	0.372093
5	12	16	24	32	6	26	6	9	64	6	0	29	70	11	1	24	69	15	1	20	69	20	4	15	66	0.742857	0.8125	0.776119	0.171429	1	0.292683	0.314286	0.916667	0.468085	0.428571	0.9375	0.588235	0.571429	0.833333	0.677966
6	14	16	24	33	6	27	6	8	64	6	0	29	70	13	1	22	69	15	1	20	69	20	4	15	66	0.771429	0.818182	0.794118	0.171429	1	0.292683	0.371429	0.928571	0.530612	0.428571	0.9375	0.588235	0.571429	0.833333	0.677966
7	14	17	24	34	6	27	7	8	63	6	0	29	70	13	1	22	69	15	2	20	68	20	4	15	66	0.771429	0.794118	0.782609	0.171429	1	0.292683	0.371429	0.928571	0.530612	0.428571	0.882353	0.576923	0.571429	0.833333	0.677966
8	14	20	24	34	7	27	7	8	63	7	0	28	70	13	1	22	69	18	2	17	68	20	4	15	66	0.771429	0.794118	0.782609	0.2	1	0.333333	0.371429	0.928571	0.530612	0.514286	0.9	0.654545	0.571429	0.833333	0.677966
9	14	20	24	34	7	27	7	8	63	7	0	28	70	13	1	22	69	18	2	17	68	20	4	15	66	0.771429	0.794118	0.782609	0.2	1	0.333333	0.371429	0.928571	0.530612	0.514286	0.9	0.654545	0.571429	0.833333	0.677966
10	14	20	24	34	7	27	7	8	63	7	0	28	70	13	1	22	69	18	2	17	68	20	4	15	66	0.771429	0.794118	0.782609	0.2	1	0.333333	0.371429	0.928571	0.530612	0.514286	0.9	0.654545	0.571429	0.833333	0.677966
Test6																										Union			Intersect			KEGG			GO			OMIM
n	KEGG	GO	OMIM	Union	Intersect	TP	FP	FN	TN	TP	FP	FN	TN	TP	FP	FN	TN	TP	FP	FN	TN	TP	FP	FN	TN	Sensitivity	Precision	F-score	Sensitivity	Precision	F-score	Sensitivity	Precision	F-score	Sensitivity	Precision	F-score	Sensitivity	Precision	F-score
1	5	9	4	14	0	14	0	21	70	0	0	35	70	5	0	30	70	9	0	26	70	4	0	31	70	0.4	1	0.571429	0	N/A	N/A	0.142857	1	0.25	0.257143	1	0.409091	0.114286	1	0.205128
2	8	11	6	15	2	15	0	20	70	2	0	33	70	8	0	27	70	11	0	24	70	6	0	29	70	0.428571	1	0.6	0.0571429	1	0.108108	0.228571	1	0.372093	0.314286	1	0.478261	0.171429	1	0.292683
3	9	14	8	19	3	19	0	16	70	3	0	32	70	9	0	26	70	14	0	21	70	8	0	27	70	0.542857	1	0.703704	0.0857143	1	0.157895	0.257143	1	0.409091	0.4	1	0.571429	0.228571	1	0.372093
4	11	14	8	21	3	21	0	14	70	3	0	32	70	11	0	24	70	14	0	21	70	8	0	27	70	0.6	1	0.75	0.0857143	1	0.157895	0.314286	1	0.478261	0.4	1	0.571429	0.228571	1	0.372093
5	13	15	22	29	6	27	2	8	68	6	0	29	70	13	0	22	70	15	0	20	70	20	2	15	68	0.771429	0.931034	0.84375	0.171429	1	0.292683	0.371429	1	0.541667	0.428571	1	0.6	0.571429	0.909091	0.701754
6	13	15	22	29	6	27	2	8	68	6	0	29	70	13	0	22	70	15	0	20	70	20	2	15	68	0.771429	0.931034	0.84375	0.171429	1	0.292683	0.371429	1	0.541667	0.428571	1	0.6	0.571429	0.909091	0.701754
7	13	19	22	29	7	27	2	8	68	7	0	28	70	13	0	22	70	19	0	16	70	20	2	15	68	0.771429	0.931034	0.84375	0.2	1	0.333333	0.371429	1	0.541667	0.542857	1	0.703704	0.571429	0.909091	0.701754
8	13	19	22	29	7	27	2	8	68	7	0	28	70	13	0	22	70	19	0	16	70	20	2	15	68	0.771429	0.931034	0.84375	0.2	1	0.333333	0.371429	1	0.541667	0.542857	1	0.703704	0.571429	0.909091	0.701754
9	13	21	22	30	8	27	3	8	67	8	0	27	70	13	0	22	70	20	1	15	69	20	2	15	68	0.771429	0.9	0.830769	0.228571	1	0.372093	0.371429	1	0.541667	0.571429	0.952381	0.714286	0.571429	0.909091	0.701754
10	13	21	22	30	8	27	3	8	67	8	0	27	70	13	0	22	70	20	1	15	69	20	2	15	68	0.771429	0.9	0.830769	0.228571	1	0.372093	0.371429	1	0.541667	0.571429	0.952381	0.714286	0.571429	0.909091	0.701754
Test7																										Union			Intersect			KEGG			GO			OMIM
n	KEGG	GO	OMIM	Union	Intersect	TP	FP	FN	TN	TP	FP	FN	TN	TP	FP	FN	TN	TP	FP	FN	TN	TP	FP	FN	TN	Sensitivity	Precision	F-score	Sensitivity	Precision	F-score	Sensitivity	Precision	F-score	Sensitivity	Precision	F-score	Sensitivity	Precision	F-score
1	5	9	4	14	0	14	0	21	70	0	0	35	70	5	0	30	70	9	0	26	70	4	0	31	70	0.4	1	0.571429	0	N/A	N/A	0.142857	1	0.25	0.257143	1	0.409091	0.114286	1	0.205128
2	8	11	24	30	2	24	6	11	64	2	0	33	70	8	0	27	70	11	0	24	70	18	6	17	64	0.685714	0.8	0.738462	0.0571429	1	0.108108	0.228571	1	0.372093	0.314286	1	0.478261	0.514286	0.75	0.610169
3	8	12	24	31	2	24	7	11	63	2	0	33	70	8	0	27	70	11	1	24	69	18	6	17	64	0.685714	0.774194	0.727273	0.0571429	1	0.108108	0.228571	1	0.372093	0.314286	0.916667	0.468085	0.514286	0.75	0.610169
4	8	16	24	33	2	25	8	10	62	2	0	33	70	8	0	27	70	14	2	21	68	18	6	17	64	0.714286	0.757576	0.735294	0.0571429	1	0.108108	0.228571	1	0.372093	0.4	0.875	0.54902	0.514286	0.75	0.610169
5	8	27	24	38	2	28	10	7	60	2	0	33	70	8	0	27	70	21	6	14	64	18	6	17	64	0.8	0.736842	0.767123	0.0571429	1	0.108108	0.228571	1	0.372093	0.6	0.777778	0.677419	0.514286	0.75	0.610169
6	8	28	24	38	2	28	10	7	60	2	0	33	70	8	0	27	70	22	6	13	64	18	6	17	64	0.8	0.736842	0.767123	0.0571429	1	0.108108	0.228571	1	0.372093	0.628571	0.785714	0.698413	0.514286	0.75	0.610169
7	8	29	24	38	2	28	10	7	60	2	0	33	70	8	0	27	70	23	6	12	64	18	6	17	64	0.8	0.736842	0.767123	0.0571429	1	0.108108	0.228571	1	0.372093	0.657143	0.793103	0.71875	0.514286	0.75	0.610169
8	8	29	24	38	2	28	10	7	60	2	0	33	70	8	0	27	70	23	6	12	64	18	6	17	64	0.8	0.736842	0.767123	0.0571429	1	0.108108	0.228571	1	0.372093	0.657143	0.793103	0.71875	0.514286	0.75	0.610169
9	8	30	24	38	3	28	10	7	60	3	0	32	70	8	0	27	70	24	6	11	64	18	6	17	64	0.8	0.736842	0.767123	0.0857143	1	0.157895	0.228571	1	0.372093	0.685714	0.8	0.738462	0.514286	0.75	0.610169
10	8	30	24	38	3	28	10	7	60	3	0	32	70	8	0	27	70	24	6	11	64	18	6	17	64	0.8	0.736842	0.767123	0.0857143	1	0.157895	0.228571	1	0.372093	0.685714	0.8	0.738462	0.514286	0.75	0.610169
Test8																										Union			Intersect			KEGG			GO			OMIM
n	KEGG	GO	OMIM	Union	Intersect	TP	FP	FN	TN	TP	FP	FN	TN	TP	FP	FN	TN	TP	FP	FN	TN	TP	FP	FN	TN	Sensitivity	Precision	F-score	Sensitivity	Precision	F-score	Sensitivity	Precision	F-score	Sensitivity	Precision	F-score	Sensitivity	Precision	F-score
1	5	9	4	14	0	14	0	21	70	0	0	35	70	5	0	30	70	9	0	26	70	4	0	31	70	0.4	1	0.571429	0	N/A	N/A	0.142857	1	0.25	0.257143	1	0.409091	0.114286	1	0.205128
2	8	11	6	15	2	15	0	20	70	2	0	33	70	8	0	27	70	11	0	24	70	6	0	29	70	0.428571	1	0.6	0.0571429	1	0.108108	0.228571	1	0.372093	0.314286	1	0.478261	0.171429	1	0.292683
3	9	12	8	17	3	16	1	19	69	3	0	32	70	9	0	26	70	11	1	24	69	8	0	27	70	0.457143	0.941176	0.615385	0.0857143	1	0.157895	0.257143	1	0.409091	0.314286	0.916667	0.468085	0.228571	1	0.372093
4	11	15	8	22	3	21	1	14	69	3	0	32	70	11	0	24	70	14	1	21	69	8	0	27	70	0.6	0.954545	0.736842	0.0857143	1	0.157895	0.314286	1	0.478261	0.4	0.933333	0.56	0.228571	1	0.372093
5	13	20	23	32	6	27	5	8	65	6	0	29	70	12	1	23	69	18	2	17	68	20	3	15	67	0.771429	0.84375	0.80597	0.171429	1	0.292683	0.342857	0.923077	0.5	0.514286	0.9	0.654545	0.571429	0.869565	0.689655
6	13	23	23	33	7	27	6	8	64	7	0	28	70	12	1	23	69	20	3	15	67	20	3	15	67	0.771429	0.818182	0.794118	0.2	1	0.333333	0.342857	0.923077	0.5	0.571429	0.869565	0.689655	0.571429	0.869565	0.689655
7	13	29	23	38	7	30	8	5	62	7	0	28	70	12	1	23	69	24	5	11	65	20	3	15	67	0.857143	0.789474	0.821918	0.2	1	0.333333	0.342857	0.923077	0.5	0.685714	0.827586	0.75	0.571429	0.869565	0.689655
8	13	29	23	38	7	30	8	5	62	7	0	28	70	12	1	23	69	24	5	11	65	20	3	15	67	0.857143	0.789474	0.821918	0.2	1	0.333333	0.342857	0.923077	0.5	0.685714	0.827586	0.75	0.571429	0.869565	0.689655
9	13	29	23	38	7	30	8	5	62	7	0	28	70	12	1	23	69	24	5	11	65	20	3	15	67	0.857143	0.789474	0.821918	0.2	1	0.333333	0.342857	0.923077	0.5	0.685714	0.827586	0.75	0.571429	0.869565	0.689655
10	13	29	23	38	7	30	8	5	62	7	0	28	70	12	1	23	69	24	5	11	65	20	3	15	67	0.857143	0.789474	0.821918	0.2	1	0.333333	0.342857	0.923077	0.5	0.685714	0.827586	0.75	0.571429	0.869565	0.689655
Test9																										Union			Intersect			KEGG			GO			OMIM
n	KEGG	GO	OMIM	Union	Intersect	TP	FP	FN	TN	TP	FP	FN	TN	TP	FP	FN	TN	TP	FP	FN	TN	TP	FP	FN	TN	Sensitivity	Precision	F-score	Sensitivity	Precision	F-score	Sensitivity	Precision	F-score	Sensitivity	Precision	F-score	Sensitivity	Precision	F-score
1	6	9	4	15	0	14	1	21	69	0	0	35	70	5	1	30	69	9	0	26	70	4	0	31	70	0.4	0.933333	0.56	0	N/A	N/A	0.142857	0.833333	0.243902	0.257143	1	0.409091	0.114286	1	0.205128
2	9	11	6	16	2	15	1	20	69	2	0	33	70	8	1	27	69	11	0	24	70	6	0	29	70	0.428571	0.9375	0.588235	0.0571429	1	0.108108	0.228571	0.888889	0.363636	0.314286	1	0.478261	0.171429	1	0.292683
3	10	14	8	20	3	19	1	16	69	3	0	32	70	9	1	26	69	14	0	21	70	8	0	27	70	0.542857	0.95	0.690909	0.0857143	1	0.157895	0.257143	0.9	0.4	0.4	1	0.571429	0.228571	1	0.372093
4	14	19	8	25	4	23	2	12	68	4	0	31	70	13	1	22	69	18	1	17	69	8	0	27	70	0.657143	0.92	0.766667	0.114286	1	0.205128	0.371429	0.928571	0.530612	0.514286	0.947368	0.666667	0.228571	1	0.372093
5	14	21	20	30	7	27	3	8	67	7	0	28	70	13	1	22	69	19	2	16	68	20	0	15	70	0.771429	0.9	0.830769	0.2	1	0.333333	0.371429	0.928571	0.530612	0.542857	0.904762	0.678571	0.571429	1	0.727273
6	14	21	20	30	7	27	3	8	67	7	0	28	70	13	1	22	69	19	2	16	68	20	0	15	70	0.771429	0.9	0.830769	0.2	1	0.333333	0.371429	0.928571	0.530612	0.542857	0.904762	0.678571	0.571429	1	0.727273
7	14	21	20	30	7	27	3	8	67	7	0	28	70	13	1	22	69	19	2	16	68	20	0	15	70	0.771429	0.9	0.830769	0.2	1	0.333333	0.371429	0.928571	0.530612	0.542857	0.904762	0.678571	0.571429	1	0.727273
8	14	21	20	30	7	27	3	8	67	7	0	28	70	13	1	22	69	19	2	16	68	20	0	15	70	0.771429	0.9	0.830769	0.2	1	0.333333	0.371429	0.928571	0.530612	0.542857	0.904762	0.678571	0.571429	1	0.727273
9	14	22	20	30	8	27	3	8	67	8	0	27	70	13	1	22	69	20	2	15	68	20	0	15	70	0.771429	0.9	0.830769	0.228571	1	0.372093	0.371429	0.928571	0.530612	0.571429	0.909091	0.701754	0.571429	1	0.727273
10	14	22	20	30	8	27	3	8	67	8	0	27	70	13	1	22	69	20	2	15	68	20	0	15	70	0.771429	0.9	0.830769	0.228571	1	0.372093	0.371429	0.928571	0.530612	0.571429	0.909091	0.701754	0.571429	1	0.727273
Test10																										Union			Intersect			KEGG			GO			OMIM
n	KEGG	GO	OMIM	Union	Intersect	TP	FP	FN	TN	TP	FP	FN	TN	TP	FP	FN	TN	TP	FP	FN	TN	TP	FP	FN	TN	Sensitivity	Precision	F-score	Sensitivity	Precision	F-score	Sensitivity	Precision	F-score	Sensitivity	Precision	F-score	Sensitivity	Precision	F-score
1	6	9	4	15	0	14	1	21	69	0	0	35	70	5	1	30	69	9	0	26	70	4	0	31	70	0.4	0.933333	0.56	0	N/A	N/A	0.142857	0.833333	0.243902	0.257143	1	0.409091	0.114286	1	0.205128
2	10	11	6	17	2	15	2	20	68	2	0	33	70	8	2	27	68	11	0	24	70	6	0	29	70	0.428571	0.882353	0.576923	0.0571429	1	0.108108	0.228571	0.8	0.355556	0.314286	1	0.478261	0.171429	1	0.292683
3	11	14	8	21	3	19	2	16	68	3	0	32	70	9	2	26	68	14	0	21	70	8	0	27	70	0.542857	0.904762	0.678571	0.0857143	1	0.157895	0.257143	0.818182	0.391304	0.4	1	0.571429	0.228571	1	0.372093
4	13	14	8	23	3	21	2	14	68	3	0	32	70	11	2	24	68	14	0	21	70	8	0	27	70	0.6	0.913043	0.724138	0.0857143	1	0.157895	0.314286	0.846154	0.458333	0.4	1	0.571429	0.228571	1	0.372093
5	13	16	21	30	6	26	4	9	66	6	0	29	70	11	2	24	68	15	1	20	69	20	1	15	69	0.742857	0.866667	0.8	0.171429	1	0.292683	0.314286	0.846154	0.458333	0.428571	0.9375	0.588235	0.571429	0.952381	0.714286
6	13	16	21	30	6	26	4	9	66	6	0	29	70	11	2	24	68	15	1	20	69	20	1	15	69	0.742857	0.866667	0.8	0.171429	1	0.292683	0.314286	0.846154	0.458333	0.428571	0.9375	0.588235	0.571429	0.952381	0.714286
7	13	18	21	31	6	26	5	9	65	6	0	29	70	11	2	24	68	16	2	19	68	20	1	15	69	0.742857	0.83871	0.787879	0.171429	1	0.292683	0.314286	0.846154	0.458333	0.457143	0.888889	0.603774	0.571429	0.952381	0.714286
8	13	20	21	31	6	26	5	9	65	6	0	29	70	11	2	24	68	18	2	17	68	20	1	15	69	0.742857	0.83871	0.787879	0.171429	1	0.292683	0.314286	0.846154	0.458333	0.514286	0.9	0.654545	0.571429	0.952381	0.714286
9	13	20	21	31	6	26	5	9	65	6	0	29	70	11	2	24	68	18	2	17	68	20	1	15	69	0.742857	0.83871	0.787879	0.171429	1	0.292683	0.314286	0.846154	0.458333	0.514286	0.9	0.654545	0.571429	0.952381	0.714286
10	13	20	21	31	6	26	5	9	65	6	0	29	70	11	2	24	68	18	2	17	68	20	1	15	69	0.742857	0.83871	0.787879	0.171429	1	0.292683	0.314286	0.846154	0.458333	0.514286	0.9	0.654545	0.571429	0.952381	0.714286
[truncated: 7 more columns]

## Sheet: auti
Test1						Union				Intersect				KEGG				GO				OMIM				Union			Intersect			KEGG			GO			OMIM				Union			Intersect			KEGG
n	KEGG	GO	OMIM	Union	Intersect	TP	FP	FN	TN	TP	FP	FN	TN	TP	FP	FN	TN	TP	FP	FN	TN	TP	FP	FN	TN	Sensitivity	Precision	F-score	Sensitivity	Precision	F-score	Sensitivity	Precision	F-score	Sensitivity	Precision	F-score	Sensitivity	Precision	F-score		Sensitivity (S)	Precision (P)	F-score (F)	Sensitivity (S)	Precision (P)	F-score (F)	Sensitivity (S)	Precision (P)
1	11	17	25	37	1	32	5	9	77	1	0	40	82	11	0	30	82	14	3	27	79	21	4	20	78	0.780488	0.864865	0.820513	0.0243902	1	0.047619	0.268293	1	0.423077	0.341463	0.823529	0.482759	0.512195	0.84	0.636364		0.760976	0.876772	0.81381	0.00731707	1	0.047619	0.268293	0.983333
2	11	17	25	37	1	32	5	9	77	1	0	40	82	11	0	30	82	14	3	27	79	21	4	20	78	0.780488	0.864865	0.820513	0.0243902	1	0.047619	0.268293	1	0.423077	0.341463	0.823529	0.482759	0.512195	0.84	0.636364		0.77561	0.856909	0.812644	0.0121951	1	0.047619	0.268293	0.983333
3	11	20	25	37	1	32	5	9	77	1	0	40	82	11	0	30	82	17	3	24	79	21	4	20	78	0.780488	0.864865	0.820513	0.0243902	1	0.047619	0.268293	1	0.423077	0.414634	0.85	0.557377	0.512195	0.84	0.636364		0.787805	0.855824	0.81909	0.0121951	1	0.047619	0.268293	0.983333
4	11	20	25	37	1	32	5	9	77	1	0	40	82	11	0	30	82	17	3	24	79	21	4	20	78	0.780488	0.864865	0.820513	0.0243902	1	0.047619	0.268293	1	0.423077	0.414634	0.85	0.557377	0.512195	0.84	0.636364		0.804878	0.843356	0.821958	0.0146341	1	0.047619	0.268293	0.983333
5	11	24	25	39	1	34	5	7	77	1	0	40	82	11	0	30	82	21	3	20	79	21	4	20	78	0.829268	0.871795	0.85	0.0243902	1	0.047619	0.268293	1	0.423077	0.512195	0.875	0.646154	0.512195	0.84	0.636364		0.817073	0.837628	0.825403	0.0146341	1	0.047619	0.268293	0.983333
6	11	24	25	39	1	34	5	7	77	1	0	40	82	11	0	30	82	21	3	20	79	21	4	20	78	0.829268	0.871795	0.85	0.0243902	1	0.047619	0.268293	1	0.423077	0.512195	0.875	0.646154	0.512195	0.84	0.636364		0.819512	0.838076	0.826884	0.0170732	1	0.047619	0.268293	0.983333
7	11	24	25	39	1	34	5	7	77	1	0	40	82	11	0	30	82	21	3	20	79	21	4	20	78	0.829268	0.871795	0.85	0.0243902	1	0.047619	0.268293	1	0.423077	0.512195	0.875	0.646154	0.512195	0.84	0.636364		0.82439	0.838894	0.829805	0.0195122	1	0.047619	0.268293	0.983333
8	11	24	25	39	1	34	5	7	77	1	0	40	82	11	0	30	82	21	3	20	79	21	4	20	78	0.829268	0.871795	0.85	0.0243902	1	0.047619	0.268293	1	0.423077	0.512195	0.875	0.646154	0.512195	0.84	0.636364		0.826829	0.837898	0.830296	0.0195122	1	0.047619	0.268293	0.983333
9	11	24	25	39	1	34	5	7	77	1	0	40	82	11	0	30	82	21	3	20	79	21	4	20	78	0.829268	0.871795	0.85	0.0243902	1	0.047619	0.268293	1	0.423077	0.512195	0.875	0.646154	0.512195	0.84	0.636364		0.829268	0.838182	0.831756	0.0219512	1	0.047619	0.268293	0.983333
10	11	24	25	39	1	34	5	7	77	1	0	40	82	11	0	30	82	21	3	20	79	21	4	20	78	0.829268	0.871795	0.85	0.0243902	1	0.047619	0.268293	1	0.423077	0.512195	0.875	0.646154	0.512195	0.84	0.636364		0.831707	0.838407	0.833221	0.0219512	1	0.047619	0.268293	0.983333
																										Union			Intersect			KEGG			GO			OMIM
n	KEGG	GO	OMIM	Union	Intersect	TP	FP	FN	TN	TP	FP	FN	TN	TP	FP	FN	TN	TP	FP	FN	TN	TP	FP	FN	TN	Sensitivity	Precision	F-score	Sensitivity	Precision	F-score	Sensitivity	Precision	F-score	Sensitivity	Precision	F-score	Sensitivity	Precision	F-score		Stdev (S)	Stdev (P)	Stdev (F)	Stdev (S)	Stdev (P)	Stdev (F)	Stdev (S)	Stdev (P)
1	11	13	27	41	0	33	8	8	74	0	0	41	82	11	0	30	82	10	3	31	79	21	6	20	76	0.804878	0.804878	0.804878	0	N/A	N/A	0.268293	1	0.423077	0.243902	0.769231	0.37037	0.512195	0.777778	0.617647		0.0224131	0.0444188	0.0152418	0.0117816	0	0	5.85139e-17	0.0351364
2	11	13	27	41	0	33	8	8	74	0	0	41	82	11	0	30	82	10	3	31	79	21	6	20	76	0.804878	0.804878	0.804878	0	N/A	N/A	0.268293	1	0.423077	0.243902	0.769231	0.37037	0.512195	0.777778	0.617647		0.0276901	0.0505538	0.0121702	0.0128548	0	0	5.85139e-17	0.0351364
3	11	13	27	41	0	33	8	8	74	0	0	41	82	11	0	30	82	10	3	31	79	21	6	20	76	0.804878	0.804878	0.804878	0	N/A	N/A	0.268293	1	0.423077	0.243902	0.769231	0.37037	0.512195	0.777778	0.617647		0.0305284	0.049222	0.021471	0.0128548	0	0	5.85139e-17	0.0351364
4	11	23	27	43	1	34	9	7	73	1	0	40	82	11	0	30	82	18	5	23	77	21	6	20	76	0.829268	0.790698	0.809524	0.0243902	1	0.047619	0.268293	1	0.423077	0.439024	0.782609	0.5625	0.512195	0.777778	0.617647		0.0257096	0.0678204	0.0323918	0.0125951	0	0	5.85139e-17	0.0351364
5	11	23	27	43	1	34	9	7	73	1	0	40	82	11	0	30	82	18	5	23	77	21	6	20	76	0.829268	0.790698	0.809524	0.0243902	1	0.047619	0.268293	1	0.423077	0.439024	0.782609	0.5625	0.512195	0.777778	0.617647		0.0237031	0.0709071	0.0342195	0.0125951	0	0	5.85139e-17	0.0351364
6	11	26	27	43	1	34	9	7	73	1	0	40	82	11	0	30	82	20	6	21	76	21	6	20	76	0.829268	0.790698	0.809524	0.0243902	1	0.047619	0.268293	1	0.423077	0.487805	0.769231	0.597015	0.512195	0.777778	0.617647		0.0205677	0.0708009	0.033306	0.0117816	0	0	5.85139e-17	0.0351364
7	11	27	27	43	1	34	9	7	73	1	0	40	82	11	0	30	82	21	6	20	76	21	6	20	76	0.829268	0.790698	0.809524	0.0243902	1	0.047619	0.268293	1	0.423077	0.512195	0.777778	0.617647	0.512195	0.777778	0.617647		0.0154257	0.0701553	0.0317956	0.0102838	0	0	5.85139e-17	0.0351364
8	11	27	27	43	1	34	9	7	73	1	0	40	82	11	0	30	82	21	6	20	76	21	6	20	76	0.829268	0.790698	0.809524	0.0243902	1	0.047619	0.268293	1	0.423077	0.512195	0.777778	0.617647	0.512195	0.777778	0.617647		0.0179967	0.0717816	0.0309969	0.0102838	0	0	5.85139e-17	0.0351364
9	11	28	27	43	1	34	9	7	73	1	0	40	82	11	0	30	82	22	6	19	76	21	6	20	76	0.829268	0.790698	0.809524	0.0243902	1	0.047619	0.268293	1	0.423077	0.536585	0.785714	0.637681	0.512195	0.777778	0.617647		0.0162602	0.0720246	0.0321498	0.00771287	0	0	5.85139e-17	0.0351364
10	11	28	27	43	1	34	9	7	73	1	0	40	82	11	0	30	82	22	6	19	76	21	6	20	76	0.829268	0.790698	0.809524	0.0243902	1	0.047619	0.268293	1	0.423077	0.536585	0.785714	0.637681	0.512195	0.777778	0.617647		0.013845	0.0723003	0.0337304	0.00771287	0	0	5.85139e-17	0.0351364
																										Union			Intersect			KEGG			GO			OMIM				# Average of 10 repeats
n	KEGG	GO	OMIM	Union	Intersect	TP	FP	FN	TN	TP	FP	FN	TN	TP	FP	FN	TN	TP	FP	FN	TN	TP	FP	FN	TN	Sensitivity	Precision	F-score	Sensitivity	Precision	F-score	Sensitivity	Precision	F-score	Sensitivity	Precision	F-score	Sensitivity	Precision	F-score
1	11	9	23	35	0	31	4	10	78	0	0	41	82	11	0	30	82	7	2	34	80	21	2	20	80	0.756098	0.885714	0.815789	0	N/A	N/A	0.268293	1	0.423077	0.170732	0.777778	0.28	0.512195	0.913043	0.65625
2	11	32	23	45	1	34	11	7	71	1	0	40	82	11	0	30	82	21	11	20	71	21	2	20	80	0.829268	0.755556	0.790698	0.0243902	1	0.047619	0.268293	1	0.423077	0.512195	0.65625	0.575342	0.512195	0.913043	0.65625
3	11	32	23	45	1	34	11	7	71	1	0	40	82	11	0	30	82	21	11	20	71	21	2	20	80	0.829268	0.755556	0.790698	0.0243902	1	0.047619	0.268293	1	0.423077	0.512195	0.65625	0.575342	0.512195	0.913043	0.65625
4	11	35	23	46	1	34	12	7	70	1	0	40	82	11	0	30	82	23	12	18	70	21	2	20	80	0.829268	0.73913	0.781609	0.0243902	1	0.047619	0.268293	1	0.423077	0.560976	0.657143	0.605263	0.512195	0.913043	0.65625
5	11	40	23	49	1	35	14	6	68	1	0	40	82	11	0	30	82	26	14	15	68	21	2	20	80	0.853659	0.714286	0.777778	0.0243902	1	0.047619	0.268293	1	0.423077	0.634146	0.65	0.641975	0.512195	0.913043	0.65625
6	11	40	23	49	1	35	14	6	68	1	0	40	82	11	0	30	82	26	14	15	68	21	2	20	80	0.853659	0.714286	0.777778	0.0243902	1	0.047619	0.268293	1	0.423077	0.634146	0.65	0.641975	0.512195	0.913043	0.65625
7	11	40	23	49	1	35	14	6	68	1	0	40	82	11	0	30	82	26	14	15	68	21	2	20	80	0.853659	0.714286	0.777778	0.0243902	1	0.047619	0.268293	1	0.423077	0.634146	0.65	0.641975	0.512195	0.913043	0.65625
8	11	40	23	49	1	35	14	6	68	1	0	40	82	11	0	30	82	26	14	15	68	21	2	20	80	0.853659	0.714286	0.777778	0.0243902	1	0.047619	0.268293	1	0.423077	0.634146	0.65	0.641975	0.512195	0.913043	0.65625
9	11	41	23	49	1	35	14	6	68	1	0	40	82	11	0	30	82	27	14	14	68	21	2	20	80	0.853659	0.714286	0.777778	0.0243902	1	0.047619	0.268293	1	0.423077	0.658537	0.658537	0.658537	0.512195	0.913043	0.65625
10	11	41	23	49	1	35	14	6	68	1	0	40	82	11	0	30	82	27	14	14	68	21	2	20	80	0.853659	0.714286	0.777778	0.0243902	1	0.047619	0.268293	1	0.423077	0.658537	0.658537	0.658537	0.512195	0.913043	0.65625
																										Union			Intersect			KEGG			GO			OMIM
n	KEGG	GO	OMIM	Union	Intersect	TP	FP	FN	TN	TP	FP	FN	TN	TP	FP	FN	TN	TP	FP	FN	TN	TP	FP	FN	TN	Sensitivity	Precision	F-score	Sensitivity	Precision	F-score	Sensitivity	Precision	F-score	Sensitivity	Precision	F-score	Sensitivity	Precision	F-score
1	12	9	22	34	1	30	4	11	78	1	0	40	82	11	1	30	81	7	2	34	80	21	1	20	81	0.731707	0.882353	0.8	0.0243902	1	0.047619	0.268293	0.916667	0.415094	0.170732	0.777778	0.28	0.512195	0.954545	0.666667
2	12	14	22	35	1	31	4	10	78	1	0	40	82	11	1	30	81	12	2	29	80	21	1	20	81	0.756098	0.885714	0.815789	0.0243902	1	0.047619	0.268293	0.916667	0.415094	0.292683	0.857143	0.436364	0.512195	0.954545	0.666667
3	12	14	22	35	1	31	4	10	78	1	0	40	82	11	1	30	81	12	2	29	80	21	1	20	81	0.756098	0.885714	0.815789	0.0243902	1	0.047619	0.268293	0.916667	0.415094	0.292683	0.857143	0.436364	0.512195	0.954545	0.666667
4	12	21	22	38	1	34	4	7	78	1	0	40	82	11	1	30	81	19	2	22	80	21	1	20	81	0.829268	0.894737	0.860759	0.0243902	1	0.047619	0.268293	0.916667	0.415094	0.463415	0.904762	0.612903	0.512195	0.954545	0.666667
5	12	22	22	38	1	34	4	7	78	1	0	40	82	11	1	30	81	20	2	21	80	21	1	20	81	0.829268	0.894737	0.860759	0.0243902	1	0.047619	0.268293	0.916667	0.415094	0.487805	0.909091	0.634921	0.512195	0.954545	0.666667
6	12	22	22	38	1	34	4	7	78	1	0	40	82	11	1	30	81	20	2	21	80	21	1	20	81	0.829268	0.894737	0.860759	0.0243902	1	0.047619	0.268293	0.916667	0.415094	0.487805	0.909091	0.634921	0.512195	0.954545	0.666667
7	12	22	22	38	1	34	4	7	78	1	0	40	82	11	1	30	81	20	2	21	80	21	1	20	81	0.829268	0.894737	0.860759	0.0243902	1	0.047619	0.268293	0.916667	0.415094	0.487805	0.909091	0.634921	0.512195	0.954545	0.666667
8	12	22	22	38	1	34	4	7	78	1	0	40	82	11	1	30	81	20	2	21	80	21	1	20	81	0.829268	0.894737	0.860759	0.0243902	1	0.047619	0.268293	0.916667	0.415094	0.487805	0.909091	0.634921	0.512195	0.954545	0.666667
9	12	24	22	38	1	34	4	7	78	1	0	40	82	11	1	30	81	22	2	19	80	21	1	20	81	0.829268	0.894737	0.860759	0.0243902	1	0.047619	0.268293	0.916667	0.415094	0.536585	0.916667	0.676923	0.512195	0.954545	0.666667
10	12	24	22	38	1	34	4	7	78	1	0	40	82	11	1	30	81	22	2	19	80	21	1	20	81	0.829268	0.894737	0.860759	0.0243902	1	0.047619	0.268293	0.916667	0.415094	0.536585	0.916667	0.676923	0.512195	0.954545	0.666667
																										Union			Intersect			KEGG			GO			OMIM
n	KEGG	GO	OMIM	Union	Intersect	TP	FP	FN	TN	TP	FP	FN	TN	TP	FP	FN	TN	TP	FP	FN	TN	TP	FP	FN	TN	Sensitivity	Precision	F-score	Sensitivity	Precision	F-score	Sensitivity	Precision	F-score	Sensitivity	Precision	F-score	Sensitivity	Precision	F-score
1	11	16	27	38	1	32	6	9	76	1	0	40	82	11	0	30	82	14	2	27	80	21	6	20	76	0.780488	0.842105	0.810127	0.0243902	1	0.047619	0.268293	1	0.423077	0.341463	0.875	0.491228	0.512195	0.777778	0.617647
2	11	19	27	38	1	32	6	9	76	1	0	40	82	11	0	30	82	17	2	24	80	21	6	20	76	0.780488	0.842105	0.810127	0.0243902	1	0.047619	0.268293	1	0.423077	0.414634	0.894737	0.566667	0.512195	0.777778	0.617647
3	11	19	27	38	1	32	6	9	76	1	0	40	82	11	0	30	82	17	2	24	80	21	6	20	76	0.780488	0.842105	0.810127	0.0243902	1	0.047619	0.268293	1	0.423077	0.414634	0.894737	0.566667	0.512195	0.777778	0.617647
4	11	28	27	45	1	33	12	8	70	1	0	40	82	11	0	30	82	19	9	22	73	21	6	20	76	0.804878	0.733333	0.767442	0.0243902	1	0.047619	0.268293	1	0.423077	0.463415	0.678571	0.550725	0.512195	0.777778	0.617647
5	11	28	27	45	1	33	12	8	70	1	0	40	82	11	0	30	82	19	9	22	73	21	6	20	76	0.804878	0.733333	0.767442	0.0243902	1	0.047619	0.268293	1	0.423077	0.463415	0.678571	0.550725	0.512195	0.777778	0.617647
6	11	29	27	45	1	33	12	8	70	1	0	40	82	11	0	30	82	20	9	21	73	21	6	20	76	0.804878	0.733333	0.767442	0.0243902	1	0.047619	0.268293	1	0.423077	0.487805	0.689655	0.571429	0.512195	0.777778	0.617647
7	11	31	27	46	1	34	12	7	70	1	0	40	82	11	0	30	82	22	9	19	73	21	6	20	76	0.829268	0.73913	0.781609	0.0243902	1	0.047619	0.268293	1	0.423077	0.536585	0.709677	0.611111	0.512195	0.777778	0.617647
8	11	33	27	48	1	35	13	6	69	1	0	40	82	11	0	30	82	23	10	18	72	21	6	20	76	0.853659	0.729167	0.786517	0.0243902	1	0.047619	0.268293	1	0.423077	0.560976	0.69697	0.621622	0.512195	0.777778	0.617647
9	11	33	27	48	1	35	13	6	69	1	0	40	82	11	0	30	82	23	10	18	72	21	6	20	76	0.853659	0.729167	0.786517	0.0243902	1	0.047619	0.268293	1	0.423077	0.560976	0.69697	0.621622	0.512195	0.777778	0.617647
10	11	33	27	48	1	35	13	6	69	1	0	40	82	11	0	30	82	23	10	18	72	21	6	20	76	0.853659	0.729167	0.786517	0.0243902	1	0.047619	0.268293	1	0.423077	0.560976	0.69697	0.621622	0.512195	0.777778	0.617647
																										Union			Intersect			KEGG			GO			OMIM
n	KEGG	GO	OMIM	Union	Intersect	TP	FP	FN	TN	TP	FP	FN	TN	TP	FP	FN	TN	TP	FP	FN	TN	TP	FP	FN	TN	Sensitivity	Precision	F-score	Sensitivity	Precision	F-score	Sensitivity	Precision	F-score	Sensitivity	Precision	F-score	Sensitivity	Precision	F-score
1	12	7	28	38	0	31	7	10	75	0	0	41	82	11	1	30	81	7	0	34	82	21	7	20	75	0.756098	0.815789	0.78481	0	N/A	N/A	0.268293	0.916667	0.415094	0.170732	1	0.291667	0.512195	0.75	0.608696
2	12	9	28	39	0	32	7	9	75	0	0	41	82	11	1	30	81	9	0	32	82	21	7	20	75	0.780488	0.820513	0.8	0	N/A	N/A	0.268293	0.916667	0.415094	0.219512	1	0.36	0.512195	0.75	0.608696
3	12	9	28	39	0	32	7	9	75	0	0	41	82	11	1	30	81	9	0	32	82	21	7	20	75	0.780488	0.820513	0.8	0	N/A	N/A	0.268293	0.916667	0.415094	0.219512	1	0.36	0.512195	0.75	0.608696
4	12	9	28	39	0	32	7	9	75	0	0	41	82	11	1	30	81	9	0	32	82	21	7	20	75	0.780488	0.820513	0.8	0	N/A	N/A	0.268293	0.916667	0.415094	0.219512	1	0.36	0.512195	0.75	0.608696
5	12	9	28	39	0	32	7	9	75	0	0	41	82	11	1	30	81	9	0	32	82	21	7	20	75	0.780488	0.820513	0.8	0	N/A	N/A	0.268293	0.916667	0.415094	0.219512	1	0.36	0.512195	0.75	0.608696
6	12	14	28	40	0	33	7	8	75	0	0	41	82	11	1	30	81	14	0	27	82	21	7	20	75	0.804878	0.825	0.814815	0	N/A	N/A	0.268293	0.916667	0.415094	0.341463	1	0.509091	0.512195	0.75	0.608696
7	12	18	28	40	1	33	7	8	75	1	0	40	82	11	1	30	81	18	0	23	82	21	7	20	75	0.804878	0.825	0.814815	0.0243902	1	0.047619	0.268293	0.916667	0.415094	0.439024	1	0.610169	0.512195	0.75	0.608696
8	12	18	28	40	1	33	7	8	75	1	0	40	82	11	1	30	81	18	0	23	82	21	7	20	75	0.804878	0.825	0.814815	0.0243902	1	0.047619	0.268293	0.916667	0.415094	0.439024	1	0.610169	0.512195	0.75	0.608696
9	12	18	28	40	1	33	7	8	75	1	0	40	82	11	1	30	81	18	0	23	82	21	7	20	75	0.804878	0.825	0.814815	0.0243902	1	0.047619	0.268293	0.916667	0.415094	0.439024	1	0.610169	0.512195	0.75	0.608696
10	12	18	28	40	1	33	7	8	75	1	0	40	82	11	1	30	81	18	0	23	82	21	7	20	75	0.804878	0.825	0.814815	0.0243902	1	0.047619	0.268293	0.916667	0.415094	0.439024	1	0.610169	0.512195	0.75	0.608696
																										Union			Intersect			KEGG			GO			OMIM
n	KEGG	GO	OMIM	Union	Intersect	TP	FP	FN	TN	TP	FP	FN	TN	TP	FP	FN	TN	TP	FP	FN	TN	TP	FP	FN	TN	Sensitivity	Precision	F-score	Sensitivity	Precision	F-score	Sensitivity	Precision	F-score	Sensitivity	Precision	F-score	Sensitivity	Precision	F-score
1	11	7	23	33	0	31	2	10	80	0	0	41	82	11	0	30	82	7	0	34	82	21	2	20	80	0.756098	0.939394	0.837838	0	N/A	N/A	0.268293	1	0.423077	0.170732	1	0.291667	0.512195	0.913043	0.65625
2	11	10	23	34	0	31	3	10	79	0	0	41	82	11	0	30	82	9	1	32	81	21	2	20	80	0.756098	0.911765	0.826667	0	N/A	N/A	0.268293	1	0.423077	0.219512	0.9	0.352941	0.512195	0.913043	0.65625
3	11	14	23	37	0	33	4	8	78	0	0	41	82	11	0	30	82	12	2	29	80	21	2	20	80	0.804878	0.891892	0.846154	0	N/A	N/A	0.268293	1	0.423077	0.292683	0.857143	0.436364	0.512195	0.913043	0.65625
4	11	14	23	37	0	33	4	8	78	0	0	41	82	11	0	30	82	12	2	29	80	21	2	20	80	0.804878	0.891892	0.846154	0	N/A	N/A	0.268293	1	0.423077	0.292683	0.857143	0.436364	0.512195	0.913043	0.65625
5	11	14	23	37	0	33	4	8	78	0	0	41	82	11	0	30	82	12	2	29	80	21	2	20	80	0.804878	0.891892	0.846154	0	N/A	N/A	0.268293	1	0.423077	0.292683	0.857143	0.436364	0.512195	0.913043	0.65625
6	11	14	23	37	0	33	4	8	78	0	0	41	82	11	0	30	82	12	2	29	80	21	2	20	80	0.804878	0.891892	0.846154	0	N/A	N/A	0.268293	1	0.423077	0.292683	0.857143	0.436364	0.512195	0.913043	0.65625
7	11	14	23	37	0	33	4	8	78	0	0	41	82	11	0	30	82	12	2	29	80	21	2	20	80	0.804878	0.891892	0.846154	0	N/A	N/A	0.268293	1	0.423077	0.292683	0.857143	0.436364	0.512195	0.913043	0.65625
8	11	14	23	37	0	33	4	8	78	0	0	41	82	11	0	30	82	12	2	29	80	21	2	20	80	0.804878	0.891892	0.846154	0	N/A	N/A	0.268293	1	0.423077	0.292683	0.857143	0.436364	0.512195	0.913043	0.65625
9	11	18	23	38	0	34	4	7	78	0	0	41	82	11	0	30	82	16	2	25	80	21	2	20	80	0.829268	0.894737	0.860759	0	N/A	N/A	0.268293	1	0.423077	0.390244	0.888889	0.542373	0.512195	0.913043	0.65625
10	11	18	23	38	0	34	4	7	78	0	0	41	82	11	0	30	82	16	2	25	80	21	2	20	80	0.829268	0.894737	0.860759	0	N/A	N/A	0.268293	1	0.423077	0.390244	0.888889	0.542373	0.512195	0.913043	0.65625
																										Union			Intersect			KEGG			GO			OMIM
n	KEGG	GO	OMIM	Union	Intersect	TP	FP	FN	TN	TP	FP	FN	TN	TP	FP	FN	TN	TP	FP	FN	TN	TP	FP	FN	TN	Sensitivity	Precision	F-score	Sensitivity	Precision	F-score	Sensitivity	Precision	F-score	Sensitivity	Precision	F-score	Sensitivity	Precision	F-score
1	11	5	23	33	0	30	3	11	79	0	0	41	82	11	0	30	82	4	1	37	81	21	2	20	80	0.731707	0.909091	0.810811	0	N/A	N/A	0.268293	1	0.423077	0.097561	0.8	0.173913	0.512195	0.913043	0.65625
2	11	5	23	33	0	30	3	11	79	0	0	41	82	11	0	30	82	4	1	37	81	21	2	20	80	0.731707	0.909091	0.810811	0	N/A	N/A	0.268293	1	0.423077	0.097561	0.8	0.173913	0.512195	0.913043	0.65625
3	11	5	23	33	0	30	3	11	79	0	0	41	82	11	0	30	82	4	1	37	81	21	2	20	80	0.731707	0.909091	0.810811	0	N/A	N/A	0.268293	1	0.423077	0.097561	0.8	0.173913	0.512195	0.913043	0.65625
4	11	11	23	34	0	31	3	10	79	0	0	41	82	11	0	30	82	10	1	31	81	21	2	20	80	0.756098	0.911765	0.826667	0	N/A	N/A	0.268293	1	0.423077	0.243902	0.909091	0.384615	0.512195	0.913043	0.65625
5	11	12	23	35	0	32	3	9	79	0	0	41	82	11	0	30	82	11	1	30	81	21	2	20	80	0.780488	0.914286	0.842105	0	N/A	N/A	0.268293	1	0.423077	0.268293	0.916667	0.415094	0.512195	0.913043	0.65625
6	11	12	23	35	0	32	3	9	79	0	0	41	82	11	0	30	82	11	1	30	81	21	2	20	80	0.780488	0.914286	0.842105	0	N/A	N/A	0.268293	1	0.423077	0.268293	0.916667	0.415094	0.512195	0.913043	0.65625
7	11	15	23	36	0	33	3	8	79	0	0	41	82	11	0	30	82	14	1	27	81	21	2	20	80	0.804878	0.916667	0.857143	0	N/A	N/A	0.268293	1	0.423077	0.341463	0.933333	0.5	0.512195	0.913043	0.65625
8	11	16	23	36	0	33	3	8	79	0	0	41	82	11	0	30	82	15	1	26	81	21	2	20	80	0.804878	0.916667	0.857143	0	N/A	N/A	0.268293	1	0.423077	0.365854	0.9375	0.526316	0.512195	0.913043	0.65625
9	11	20	23	36	1	33	3	8	79	1	0	40	82	11	0	30	82	19	1	22	81	21	2	20	80	0.804878	0.916667	0.857143	0.0243902	1	0.047619	0.268293	1	0.423077	0.463415	0.95	0.622951	0.512195	0.913043	0.65625
10	11	21	23	37	1	34	3	7	79	1	0	40	82	11	0	30	82	20	1	21	81	21	2	20	80	0.829268	0.918919	0.871795	0.0243902	1	0.047619	0.268293	1	0.423077	0.487805	0.952381	0.645161	0.512195	0.913043	0.65625
																										Union			Intersect			KEGG			GO			OMIM
n	KEGG	GO	OMIM	Union	Intersect	TP	FP	FN	TN	TP	FP	FN	TN	TP	FP	FN	TN	TP	FP	FN	TN	TP	FP	FN	TN	Sensitivity	Precision	F-score	Sensitivity	Precision	F-score	Sensitivity	Precision	F-score	Sensitivity	Precision	F-score	Sensitivity	Precision	F-score
1	11	7	24	34	0	31	3	10	79	0	0	41	82	11	0	30	82	7	0	34	82	21	3	20	79	0.756098	0.911765	0.826667	0	N/A	N/A	0.268293	1	0.423077	0.170732	1	0.291667	0.512195	0.875	0.646154
2	11	18	24	36	1	32	4	9	78	1	0	40	82	11	0	30	82	17	1	24	81	21	3	20	79	0.780488	0.888889	0.831169	0.0243902	1	0.047619	0.268293	1	0.423077	0.414634	0.944444	0.576271	0.512195	0.875	0.646154
3	11	22	24	38	1	34	4	7	78	1	0	40	82	11	0	30	82	21	1	20	81	21	3	20	79	0.829268	0.894737	0.860759	0.0243902	1	0.047619	0.268293	1	0.423077	0.512195	0.954545	0.666667	0.512195	0.875	0.646154
4	11	22	24	38	1	34	4	7	78	1	0	40	82	11	0	30	82	21	1	20	81	21	3	20	79	0.829268	0.894737	0.860759	0.0243902	1	0.047619	0.268293	1	0.423077	0.512195	0.954545	0.666667	0.512195	0.875	0.646154
5	11	22	24	38	1	34	4	7	78	1	0	40	82	11	0	30	82	21	1	20	81	21	3	20	79	0.829268	0.894737	0.860759	0.0243902	1	0.047619	0.268293	1	0.423077	0.512195	0.954545	0.666667	0.512195	0.875	0.646154
6	11	22	24	38	1	34	4	7	78	1	0	40	82	11	0	30	82	21	1	20	81	21	3	20	79	0.829268	0.894737	0.860759	0.0243902	1	0.047619	0.268293	1	0.423077	0.512195	0.954545	0.666667	0.512195	0.875	0.646154
7	11	22	24	38	1	34	4	7	78	1	0	40	82	11	0	30	82	21	1	20	81	21	3	20	79	0.829268	0.894737	0.860759	0.0243902	1	0.047619	0.268293	1	0.423077	0.512195	0.954545	0.666667	0.512195	0.875	0.646154
8	11	22	24	38	1	34	4	7	78	1	0	40	82	11	0	30	82	21	1	20	81	21	3	20	79	0.829268	0.894737	0.860759	0.0243902	1	0.047619	0.268293	1	0.423077	0.512195	0.954545	0.666667	0.512195	0.875	0.646154
9	11	22	24	38	1	34	4	7	78	1	0	40	82	11	0	30	82	21	1	20	81	21	3	20	79	0.829268	0.894737	0.860759	0.0243902	1	0.047619	0.268293	1	0.423077	0.512195	0.954545	0.666667	0.512195	0.875	0.646154
10	11	22	24	38	1	34	4	7	78	1	0	40	82	11	0	30	82	21	1	20	81	21	3	20	79	0.829268	0.894737	0.860759	0.0243902	1	0.047619	0.268293	1	0.423077	0.512195	0.954545	0.666667	0.512195	0.875	0.646154
																										Union			Intersect			KEGG			GO			OMIM
n	KEGG	GO	OMIM	Union	Intersect	TP	FP	FN	TN	TP	FP	FN	TN	TP	FP	FN	TN	TP	FP	FN	TN	TP	FP	FN	TN	Sensitivity	Precision	F-score	Sensitivity	Precision	F-score	Sensitivity	Precision	F-score	Sensitivity	Precision	F-score	Sensitivity	Precision	F-score
1	11	3	24	34	0	31	3	10	79	0	0	41	82	11	0	30	82	3	0	38	82	21	3	20	79	0.756098	0.911765	0.826667	0	N/A	N/A	0.268293	1	0.423077	0.0731707	1	0.136364	0.512195	0.875	0.646154
2	11	7	24	35	0	31	4	10	78	0	0	41	82	11	0	30	82	6	1	35	81	21	3	20	79	0.756098	0.885714	0.815789	0	N/A	N/A	0.268293	1	0.423077	0.146341	0.857143	0.25	0.512195	0.875	0.646154
3	11	11	24	36	0	32	4	9	78	0	0	41	82	11	0	30	82	10	1	31	81	21	3	20	79	0.780488	0.888889	0.831169	0	N/A	N/A	0.268293	1	0.423077	0.243902	0.909091	0.384615	0.512195	0.875	0.646154
4	11	16	24	37	0	33	4	8	78	0	0	41	82	11	0	30	82	15	1	26	81	21	3	20	79	0.804878	0.891892	0.846154	0	N/A	N/A	0.268293	1	0.423077	0.365854	0.9375	0.526316	0.512195	0.875	0.646154
5	11	19	24	40	0	34	6	7	76	0	0	41	82	11	0	30	82	16	3	25	79	21	3	20	79	0.829268	0.85	0.839506	0	N/A	N/A	0.268293	1	0.423077	0.390244	0.842105	0.533333	0.512195	0.875	0.646154
6	11	24	24	40	1	34	6	7	76	1	0	40	82	11	0	30	82	21	3	20	79	21	3	20	79	0.829268	0.85	0.839506	0.0243902	1	0.047619	0.268293	1	0.423077	0.512195	0.875	0.646154	0.512195	0.875	0.646154
7	11	24	24	40	1	34	6	7	76	1	0	40	82	11	0	30	82	21	3	20	79	21	3	20	79	0.829268	0.85	0.839506	0.0243902	1	0.047619	0.268293	1	0.423077	0.512195	0.875	0.646154	0.512195	0.875	0.646154
8	11	24	24	40	1	34	6	7	76	1	0	40	82	11	0	30	82	21	3	20	79	21	3	20	79	0.829268	0.85	0.839506	0.0243902	1	0.047619	0.268293	1	0.423077	0.512195	0.875	0.646154	0.512195	0.875	0.646154
9	11	24	24	40	1	34	6	7	76	1	0	40	82	11	0	30	82	21	3	20	79	21	3	20	79	0.829268	0.85	0.839506	0.0243902	1	0.047619	0.268293	1	0.423077	0.512195	0.875	0.646154	0.512195	0.875	0.646154
10	11	24	24	40	1	34	6	7	76	1	0	40	82	11	0	30	82	21	3	20	79	21	3	20	79	0.829268	0.85	0.839506	0.0243902	1	0.047619	0.268293	1	0.423077	0.512195	0.875	0.646154	0.512195	0.875	0.646154
[truncated: 7 more columns]

## Sheet: cerv
Test1						Union				Intersect				KEGG				GO				OMIM				Union			Intersect			KEGG			GO			OMIM				Union			Intersect			KEGG
n	KEGG	GO	OMIM	Union	Intersect	TP	FP	FN	TN	TP	FP	FN	TN	TP	FP	FN	TN	TP	FP	FN	TN	TP	FP	FN	TN	Sensitivity	Precision	F-score	Sensitivity	Precision	F-score	Sensitivity	Precision	F-score	Sensitivity	Precision	F-score	Sensitivity	Precision	F-score		Sensitivity (S)	Precision (P)	F-score (F)	Sensitivity (S)	Precision (P)	F-score (F)	Sensitivity (S)	Precision (P)
1	14	3	2	14	0	14	0	24	76	0	0	38	76	14	0	24	76	3	0	35	76	2	0	36	76	0.368421	1	0.538462	0	N/A	N/A	0.368421	1	0.538462	0.0789474	1	0.146341	0.0526316	1	0.1		0.442105	0.95128	0.592746	0.00526316	1	0.0512821	0.378947	0.981569
2	18	3	13	27	1	22	5	16	71	1	0	37	76	18	0	20	76	3	0	35	76	8	5	30	71	0.578947	0.814815	0.676923	0.0263158	1	0.0512821	0.473684	1	0.642857	0.0789474	1	0.146341	0.210526	0.615385	0.313725		0.584211	0.869194	0.692496	0.0368421	1	0.0780835	0.473684	0.984211
3	22	3	13	31	1	25	6	13	70	1	0	37	76	21	1	17	75	3	0	35	76	8	5	30	71	0.657895	0.806452	0.724638	0.0263158	1	0.0512821	0.552632	0.954545	0.7	0.0789474	1	0.146341	0.210526	0.615385	0.313725		0.694737	0.851756	0.761735	0.0605263	1	0.11251	0.552632	0.973123
4	22	7	13	33	1	27	6	11	70	1	0	37	76	21	1	17	75	7	0	31	76	8	5	30	71	0.710526	0.818182	0.760563	0.0263158	1	0.0512821	0.552632	0.954545	0.7	0.184211	1	0.311111	0.210526	0.615385	0.313725		0.726316	0.846508	0.78061	0.0631579	0.98	0.116939	0.552632	0.968972
5	22	17	13	35	2	28	7	10	69	2	0	36	76	21	1	17	75	16	1	22	75	8	5	30	71	0.736842	0.8	0.767123	0.0526316	1	0.1	0.552632	0.954545	0.7	0.421053	0.941176	0.581818	0.210526	0.615385	0.313725		0.755263	0.84025	0.794973	0.0763158	0.98	0.140365	0.552632	0.968972
6	22	18	13	35	3	28	7	10	69	3	0	35	76	21	1	17	75	17	1	21	75	8	5	30	71	0.736842	0.8	0.767123	0.0789474	1	0.146341	0.552632	0.954545	0.7	0.447368	0.944444	0.607143	0.210526	0.615385	0.313725		0.760526	0.833677	0.794998	0.0842105	0.98	0.154046	0.552632	0.964427
7	22	18	13	35	3	28	7	10	69	3	0	35	76	21	1	17	75	17	1	21	75	8	5	30	71	0.736842	0.8	0.767123	0.0789474	1	0.146341	0.552632	0.954545	0.7	0.447368	0.944444	0.607143	0.210526	0.615385	0.313725		0.778947	0.834246	0.805487	0.0973684	0.940714	0.175016	0.576316	0.956932
8	26	19	13	37	4	29	8	9	68	4	0	34	76	25	1	13	75	17	2	21	74	8	5	30	71	0.763158	0.783784	0.773333	0.105263	1	0.190476	0.657895	0.961538	0.78125	0.447368	0.894737	0.596491	0.210526	0.615385	0.313725		0.794737	0.834814	0.814135	0.115789	0.940714	0.205515	0.642105	0.960681
9	26	19	13	37	4	29	8	9	68	4	0	34	76	25	1	13	75	17	2	21	74	8	5	30	71	0.763158	0.783784	0.773333	0.105263	1	0.190476	0.657895	0.961538	0.78125	0.447368	0.894737	0.596491	0.210526	0.615385	0.313725		0.794737	0.834814	0.814135	0.118421	0.945714	0.209834	0.65	0.961182
10	26	19	13	37	4	29	8	9	68	4	0	34	76	25	1	13	75	17	2	21	74	8	5	30	71	0.763158	0.783784	0.773333	0.105263	1	0.190476	0.657895	0.961538	0.78125	0.447368	0.894737	0.596491	0.210526	0.615385	0.313725		0.805263	0.832695	0.818408	0.121053	0.949048	0.213957	0.660526	0.962251
																										Union			Intersect			KEGG			GO			OMIM
n	KEGG	GO	OMIM	Union	Intersect	TP	FP	FN	TN	TP	FP	FN	TN	TP	FP	FN	TN	TP	FP	FN	TN	TP	FP	FN	TN	Sensitivity	Precision	F-score	Sensitivity	Precision	F-score	Sensitivity	Precision	F-score	Sensitivity	Precision	F-score	Sensitivity	Precision	F-score		Stdev (S)	Stdev (P)	Stdev (F)	Stdev (S)	Stdev (P)	Stdev (F)	Stdev (S)	Stdev (P)
1	14	3	2	14	0	14	0	24	64	0	0	38	64	14	0	24	64	3	0	35	64	2	0	36	64	0.368421	1	0.538462	0	N/A	N/A	0.368421	1	0.538462	0.0789474	1	0.146341	0.0526316	1	0.1		0.108715	0.0635809	0.0783831	0.0110957	0	0	0.0221914	0.029754
2	18	3	13	27	1	22	5	16	59	1	0	37	64	18	0	20	64	3	0	35	64	8	5	30	59	0.578947	0.814815	0.676923	0.0263158	1	0.0512821	0.473684	1	0.642857	0.0789474	1	0.146341	0.210526	0.615385	0.313725		0.0909916	0.0560621	0.050921	0.0221914	0	0.0348061	5.85139e-17	0.0254235
3	21	8	13	33	1	27	6	11	58	1	0	37	64	21	0	17	64	7	1	31	63	8	5	30	59	0.710526	0.818182	0.760563	0.0263158	1	0.0512821	0.552632	1	0.711864	0.184211	0.875	0.304348	0.210526	0.615385	0.313725		0.067035	0.0541652	0.034582	0.0329386	0	0.0584457	1.17028e-16	0.0309155
4	21	8	13	33	1	27	6	11	58	1	0	37	64	21	0	17	64	7	1	31	63	8	5	30	59	0.710526	0.818182	0.760563	0.0263158	1	0.0512821	0.552632	1	0.711864	0.184211	0.875	0.304348	0.210526	0.615385	0.313725		0.0376274	0.0402509	0.0205663	0.0308892	0.0632456	0.0540406	1.17028e-16	0.0360464
5	21	8	13	33	1	27	6	11	58	1	0	37	64	21	0	17	64	7	1	31	63	8	5	30	59	0.710526	0.818182	0.760563	0.0263158	1	0.0512821	0.552632	1	0.711864	0.184211	0.875	0.304348	0.210526	0.615385	0.313725		0.0305132	0.032581	0.0231503	0.0261692	0.0632456	0.0452725	1.17028e-16	0.0360464
6	22	8	13	34	1	27	7	11	57	1	0	37	64	21	1	17	63	7	1	31	63	8	5	30	59	0.710526	0.794118	0.75	0.0263158	1	0.0512821	0.552632	0.954545	0.7	0.184211	0.875	0.304348	0.210526	0.615385	0.313725		0.0315058	0.0326651	0.0255767	0.0241825	0.0632456	0.0419825	1.17028e-16	0.0345332
7	22	17	13	35	2	28	7	10	57	2	0	36	64	21	1	17	63	16	1	22	63	8	5	30	59	0.736842	0.8	0.767123	0.0526316	1	0.1	0.552632	0.954545	0.7	0.421053	0.941176	0.581818	0.210526	0.615385	0.313725		0.0254235	0.0306749	0.0252518	0.0278776	0.0987478	0.0444518	0.0437718	0.029101
8	26	18	13	36	4	29	7	9	57	4	0	34	64	25	1	13	63	17	1	21	63	8	5	30	59	0.763158	0.805556	0.783784	0.105263	1	0.190476	0.657895	0.961538	0.78125	0.447368	0.944444	0.607143	0.210526	0.615385	0.313725		0.0241825	0.0334093	0.0264886	0.0221914	0.0987478	0.0351871	0.0332871	0.0263694
9	26	18	13	36	4	29	7	9	57	4	0	34	64	25	1	13	63	17	1	21	63	8	5	30	59	0.763158	0.805556	0.783784	0.105263	1	0.190476	0.657895	0.961538	0.78125	0.447368	0.944444	0.607143	0.210526	0.615385	0.313725		0.0241825	0.0334093	0.0264886	0.0186081	0.0887811	0.0286932	0.0249653	0.0263292
10	26	24	13	40	4	31	9	7	55	4	0	34	64	25	1	13	63	21	3	17	61	8	5	30	59	0.815789	0.775	0.794872	0.105263	1	0.190476	0.657895	0.961538	0.78125	0.552632	0.875	0.677419	0.210526	0.615385	0.313725		0.0221914	0.0372006	0.0248442	0.0184002	0.0831495	0.0278448	0.00832178	0.0247028
																										Union			Intersect			KEGG			GO			OMIM				# Average of 10 repeats
n	KEGG	GO	OMIM	Union	Intersect	TP	FP	FN	TN	TP	FP	FN	TN	TP	FP	FN	TN	TP	FP	FN	TN	TP	FP	FN	TN	Sensitivity	Precision	F-score	Sensitivity	Precision	F-score	Sensitivity	Precision	F-score	Sensitivity	Precision	F-score	Sensitivity	Precision	F-score
1	14	3	2	14	0	14	0	24	64	0	0	38	64	14	0	24	64	3	0	35	64	2	0	36	64	0.368421	1	0.538462	0	N/A	N/A	0.368421	1	0.538462	0.0789474	1	0.146341	0.0526316	1	0.1
2	18	3	10	24	1	22	2	16	62	1	0	37	64	18	0	20	64	3	0	35	64	8	2	30	62	0.578947	0.916667	0.709677	0.0263158	1	0.0512821	0.473684	1	0.642857	0.0789474	1	0.146341	0.210526	0.8	0.333333
3	21	7	10	29	1	27	2	11	62	1	0	37	64	21	0	17	64	7	0	31	64	8	2	30	62	0.710526	0.931034	0.80597	0.0263158	1	0.0512821	0.552632	1	0.711864	0.184211	1	0.311111	0.210526	0.8	0.333333
4	21	7	10	29	1	27	2	11	62	1	0	37	64	21	0	17	64	7	0	31	64	8	2	30	62	0.710526	0.931034	0.80597	0.0263158	1	0.0512821	0.552632	1	0.711864	0.184211	1	0.311111	0.210526	0.8	0.333333
5	21	23	10	34	3	30	4	8	60	3	0	35	64	21	0	17	64	21	2	17	62	8	2	30	62	0.789474	0.882353	0.833333	0.0789474	1	0.146341	0.552632	1	0.711864	0.552632	0.913043	0.688525	0.210526	0.8	0.333333
6	21	23	10	34	3	30	4	8	60	3	0	35	64	21	0	17	64	21	2	17	62	8	2	30	62	0.789474	0.882353	0.833333	0.0789474	1	0.146341	0.552632	1	0.711864	0.552632	0.913043	0.688525	0.210526	0.8	0.333333
7	21	23	10	34	3	30	4	8	60	3	0	35	64	21	0	17	64	21	2	17	62	8	2	30	62	0.789474	0.882353	0.833333	0.0789474	1	0.146341	0.552632	1	0.711864	0.552632	0.913043	0.688525	0.210526	0.8	0.333333
8	25	23	10	35	4	31	4	7	60	4	0	34	64	25	0	13	64	21	2	17	62	8	2	30	62	0.815789	0.885714	0.849315	0.105263	1	0.190476	0.657895	1	0.793651	0.552632	0.913043	0.688525	0.210526	0.8	0.333333
9	25	23	10	35	4	31	4	7	60	4	0	34	64	25	0	13	64	21	2	17	62	8	2	30	62	0.815789	0.885714	0.849315	0.105263	1	0.190476	0.657895	1	0.793651	0.552632	0.913043	0.688525	0.210526	0.8	0.333333
10	25	23	10	35	4	31	4	7	60	4	0	34	64	25	0	13	64	21	2	17	62	8	2	30	62	0.815789	0.885714	0.849315	0.105263	1	0.190476	0.657895	1	0.793651	0.552632	0.913043	0.688525	0.210526	0.8	0.333333
																										Union			Intersect			KEGG			GO			OMIM
n	KEGG	GO	OMIM	Union	Intersect	TP	FP	FN	TN	TP	FP	FN	TN	TP	FP	FN	TN	TP	FP	FN	TN	TP	FP	FN	TN	Sensitivity	Precision	F-score	Sensitivity	Precision	F-score	Sensitivity	Precision	F-score	Sensitivity	Precision	F-score	Sensitivity	Precision	F-score
1	14	23	2	28	1	24	4	14	60	1	0	37	64	14	0	24	64	19	4	19	60	2	0	36	64	0.631579	0.857143	0.727273	0.0263158	1	0.0512821	0.368421	1	0.538462	0.5	0.826087	0.622951	0.0526316	1	0.1
2	18	25	3	31	2	27	4	11	60	2	0	36	64	18	0	20	64	21	4	17	60	3	0	35	64	0.710526	0.870968	0.782609	0.0526316	1	0.1	0.473684	1	0.642857	0.552632	0.84	0.666667	0.0789474	1	0.146341
3	21	25	11	36	4	30	6	8	58	4	0	34	64	21	0	17	64	21	4	17	60	9	2	29	62	0.789474	0.833333	0.810811	0.105263	1	0.190476	0.552632	1	0.711864	0.552632	0.84	0.666667	0.236842	0.818182	0.367347
4	21	25	11	36	4	30	6	8	58	4	0	34	64	21	0	17	64	21	4	17	60	9	2	29	62	0.789474	0.833333	0.810811	0.105263	1	0.190476	0.552632	1	0.711864	0.552632	0.84	0.666667	0.236842	0.818182	0.367347
5	21	25	11	36	4	30	6	8	58	4	0	34	64	21	0	17	64	21	4	17	60	9	2	29	62	0.789474	0.833333	0.810811	0.105263	1	0.190476	0.552632	1	0.711864	0.552632	0.84	0.666667	0.236842	0.818182	0.367347
6	21	25	11	36	4	30	6	8	58	4	0	34	64	21	0	17	64	21	4	17	60	9	2	29	62	0.789474	0.833333	0.810811	0.105263	1	0.190476	0.552632	1	0.711864	0.552632	0.84	0.666667	0.236842	0.818182	0.367347
7	21	26	11	36	4	30	6	8	58	4	0	34	64	21	0	17	64	22	4	16	60	9	2	29	62	0.789474	0.833333	0.810811	0.105263	1	0.190476	0.552632	1	0.711864	0.578947	0.846154	0.6875	0.236842	0.818182	0.367347
8	25	26	11	37	5	31	6	7	58	5	0	33	64	25	0	13	64	22	4	16	60	9	2	29	62	0.815789	0.837838	0.826667	0.131579	1	0.232558	0.657895	1	0.793651	0.578947	0.846154	0.6875	0.236842	0.818182	0.367347
9	25	26	11	37	5	31	6	7	58	5	0	33	64	25	0	13	64	22	4	16	60	9	2	29	62	0.815789	0.837838	0.826667	0.131579	1	0.232558	0.657895	1	0.793651	0.578947	0.846154	0.6875	0.236842	0.818182	0.367347
10	25	26	11	37	5	31	6	7	58	5	0	33	64	25	0	13	64	22	4	16	60	9	2	29	62	0.815789	0.837838	0.826667	0.131579	1	0.232558	0.657895	1	0.793651	0.578947	0.846154	0.6875	0.236842	0.818182	0.367347
																										Union			Intersect			KEGG			GO			OMIM
n	KEGG	GO	OMIM	Union	Intersect	TP	FP	FN	TN	TP	FP	FN	TN	TP	FP	FN	TN	TP	FP	FN	TN	TP	FP	FN	TN	Sensitivity	Precision	F-score	Sensitivity	Precision	F-score	Sensitivity	Precision	F-score	Sensitivity	Precision	F-score	Sensitivity	Precision	F-score
1	15	3	2	15	0	14	1	24	63	0	0	38	64	14	1	24	63	2	1	36	63	2	0	36	64	0.368421	0.933333	0.528302	0	N/A	N/A	0.368421	0.933333	0.528302	0.0526316	0.666667	0.097561	0.0526316	1	0.1
2	19	14	3	24	2	21	3	17	61	2	0	36	64	18	1	20	63	11	3	27	61	3	0	35	64	0.552632	0.875	0.677419	0.0526316	1	0.1	0.473684	0.947368	0.631579	0.289474	0.785714	0.423077	0.0789474	1	0.146341
3	22	16	11	30	4	26	4	12	60	4	0	34	64	21	1	17	63	13	3	25	61	9	2	29	62	0.684211	0.866667	0.764706	0.105263	1	0.190476	0.552632	0.954545	0.7	0.342105	0.8125	0.481481	0.236842	0.818182	0.367347
4	23	16	11	30	5	26	4	12	60	4	1	34	63	21	2	17	62	13	3	25	61	9	2	29	62	0.684211	0.866667	0.764706	0.105263	0.8	0.186047	0.552632	0.913043	0.688525	0.342105	0.8125	0.481481	0.236842	0.818182	0.367347
5	23	26	11	35	5	30	5	8	59	4	1	34	63	21	2	17	62	21	5	17	59	9	2	29	62	0.789474	0.857143	0.821918	0.105263	0.8	0.186047	0.552632	0.913043	0.688525	0.552632	0.807692	0.65625	0.236842	0.818182	0.367347
6	23	27	11	35	5	30	5	8	59	4	1	34	63	21	2	17	62	22	5	16	59	9	2	29	62	0.789474	0.857143	0.821918	0.105263	0.8	0.186047	0.552632	0.913043	0.688525	0.578947	0.814815	0.676923	0.236842	0.818182	0.367347
7	23	27	11	35	5	30	5	8	59	4	1	34	63	21	2	17	62	22	5	16	59	9	2	29	62	0.789474	0.857143	0.821918	0.105263	0.8	0.186047	0.552632	0.913043	0.688525	0.578947	0.814815	0.676923	0.236842	0.818182	0.367347
8	24	27	11	35	5	30	5	8	59	4	1	34	63	22	2	16	62	22	5	16	59	9	2	29	62	0.789474	0.857143	0.821918	0.105263	0.8	0.186047	0.578947	0.916667	0.709677	0.578947	0.814815	0.676923	0.236842	0.818182	0.367347
9	24	27	11	35	5	30	5	8	59	4	1	34	63	22	2	16	62	22	5	16	59	9	2	29	62	0.789474	0.857143	0.821918	0.105263	0.8	0.186047	0.578947	0.916667	0.709677	0.578947	0.814815	0.676923	0.236842	0.818182	0.367347
10	27	27	11	36	6	31	5	7	59	5	1	33	63	25	2	13	62	22	5	16	59	9	2	29	62	0.815789	0.861111	0.837838	0.131579	0.833333	0.227273	0.657895	0.925926	0.769231	0.578947	0.814815	0.676923	0.236842	0.818182	0.367347
																										Union			Intersect			KEGG			GO			OMIM
n	KEGG	GO	OMIM	Union	Intersect	TP	FP	FN	TN	TP	FP	FN	TN	TP	FP	FN	TN	TP	FP	FN	TN	TP	FP	FN	TN	Sensitivity	Precision	F-score	Sensitivity	Precision	F-score	Sensitivity	Precision	F-score	Sensitivity	Precision	F-score	Sensitivity	Precision	F-score
1	14	3	2	14	0	14	0	24	64	0	0	38	64	14	0	24	64	3	0	35	64	2	0	36	64	0.368421	1	0.538462	0	N/A	N/A	0.368421	1	0.538462	0.0789474	1	0.146341	0.0526316	1	0.1
2	18	3	4	19	1	18	1	20	63	1	0	37	64	18	0	20	64	3	0	35	64	3	1	35	63	0.473684	0.947368	0.631579	0.0263158	1	0.0512821	0.473684	1	0.642857	0.0789474	1	0.146341	0.0789474	0.75	0.142857
3	21	3	5	22	1	21	1	17	63	1	0	37	64	21	0	17	64	3	0	35	64	4	1	34	63	0.552632	0.954545	0.7	0.0263158	1	0.0512821	0.552632	1	0.711864	0.0789474	1	0.146341	0.105263	0.8	0.186047
4	21	7	14	31	2	27	4	11	60	2	0	36	64	21	0	17	64	7	0	31	64	10	4	28	60	0.710526	0.870968	0.782609	0.0526316	1	0.1	0.552632	1	0.711864	0.184211	1	0.311111	0.263158	0.714286	0.384615
5	21	19	14	32	4	28	4	10	60	4	0	34	64	21	0	17	64	17	2	21	62	10	4	28	60	0.736842	0.875	0.8	0.105263	1	0.190476	0.552632	1	0.711864	0.447368	0.894737	0.596491	0.263158	0.714286	0.384615
6	21	19	14	32	4	28	4	10	60	4	0	34	64	21	0	17	64	17	2	21	62	10	4	28	60	0.736842	0.875	0.8	0.105263	1	0.190476	0.552632	1	0.711864	0.447368	0.894737	0.596491	0.263158	0.714286	0.384615
7	26	25	14	36	7	31	5	7	59	6	1	32	63	25	1	13	63	22	3	16	61	10	4	28	60	0.815789	0.861111	0.837838	0.157895	0.857143	0.266667	0.657895	0.961538	0.78125	0.578947	0.88	0.698413	0.263158	0.714286	0.384615
8	26	25	14	36	7	31	5	7	59	6	1	32	63	25	1	13	63	22	3	16	61	10	4	28	60	0.815789	0.861111	0.837838	0.157895	0.857143	0.266667	0.657895	0.961538	0.78125	0.578947	0.88	0.698413	0.263158	0.714286	0.384615
9	26	25	14	36	7	31	5	7	59	6	1	32	63	25	1	13	63	22	3	16	61	10	4	28	60	0.815789	0.861111	0.837838	0.157895	0.857143	0.266667	0.657895	0.961538	0.78125	0.578947	0.88	0.698413	0.263158	0.714286	0.384615
10	26	25	14	36	7	31	5	7	59	6	1	32	63	25	1	13	63	22	3	16	61	10	4	28	60	0.815789	0.861111	0.837838	0.157895	0.857143	0.266667	0.657895	0.961538	0.78125	0.578947	0.88	0.698413	0.263158	0.714286	0.384615
																										Union			Intersect			KEGG			GO			OMIM
n	KEGG	GO	OMIM	Union	Intersect	TP	FP	FN	TN	TP	FP	FN	TN	TP	FP	FN	TN	TP	FP	FN	TN	TP	FP	FN	TN	Sensitivity	Precision	F-score	Sensitivity	Precision	F-score	Sensitivity	Precision	F-score	Sensitivity	Precision	F-score	Sensitivity	Precision	F-score
1	14	3	2	14	0	14	0	24	64	0	0	38	64	14	0	24	64	3	0	35	64	2	0	36	64	0.368421	1	0.538462	0	N/A	N/A	0.368421	1	0.538462	0.0789474	1	0.146341	0.0526316	1	0.1
2	18	3	12	26	1	22	4	16	60	1	0	37	64	18	0	20	64	3	0	35	64	8	4	30	60	0.578947	0.846154	0.6875	0.0263158	1	0.0512821	0.473684	1	0.642857	0.0789474	1	0.146341	0.210526	0.666667	0.32
3	22	13	12	32	2	26	6	12	58	2	0	36	64	21	1	17	63	12	1	26	63	8	4	30	60	0.684211	0.8125	0.742857	0.0526316	1	0.1	0.552632	0.954545	0.7	0.315789	0.923077	0.470588	0.210526	0.666667	0.32
4	22	17	12	34	2	28	6	10	58	2	0	36	64	21	1	17	63	16	1	22	63	8	4	30	60	0.736842	0.823529	0.777778	0.0526316	1	0.1	0.552632	0.954545	0.7	0.421053	0.941176	0.581818	0.210526	0.666667	0.32
5	22	17	12	34	2	28	6	10	58	2	0	36	64	21	1	17	63	16	1	22	63	8	4	30	60	0.736842	0.823529	0.777778	0.0526316	1	0.1	0.552632	0.954545	0.7	0.421053	0.941176	0.581818	0.210526	0.666667	0.32
6	22	18	12	34	3	28	6	10	58	3	0	35	64	21	1	17	63	17	1	21	63	8	4	30	60	0.736842	0.823529	0.777778	0.0789474	1	0.146341	0.552632	0.954545	0.7	0.447368	0.944444	0.607143	0.210526	0.666667	0.32
7	26	18	12	35	4	29	6	9	58	4	0	34	64	25	1	13	63	17	1	21	63	8	4	30	60	0.763158	0.828571	0.794521	0.105263	1	0.190476	0.657895	0.961538	0.78125	0.447368	0.944444	0.607143	0.210526	0.666667	0.32
8	26	18	12	35	4	29	6	9	58	4	0	34	64	25	1	13	63	17	1	21	63	8	4	30	60	0.763158	0.828571	0.794521	0.105263	1	0.190476	0.657895	0.961538	0.78125	0.447368	0.944444	0.607143	0.210526	0.666667	0.32
9	26	19	12	35	4	29	6	9	58	4	0	34	64	25	1	13	63	18	1	20	63	8	4	30	60	0.763158	0.828571	0.794521	0.105263	1	0.190476	0.657895	0.961538	0.78125	0.473684	0.947368	0.631579	0.210526	0.666667	0.32
10	26	19	12	35	4	29	6	9	58	4	0	34	64	25	1	13	63	18	1	20	63	8	4	30	60	0.763158	0.828571	0.794521	0.105263	1	0.190476	0.657895	0.961538	0.78125	0.473684	0.947368	0.631579	0.210526	0.666667	0.32
																										Union			Intersect			KEGG			GO			OMIM
n	KEGG	GO	OMIM	Union	Intersect	TP	FP	FN	TN	TP	FP	FN	TN	TP	FP	FN	TN	TP	FP	FN	TN	TP	FP	FN	TN	Sensitivity	Precision	F-score	Sensitivity	Precision	F-score	Sensitivity	Precision	F-score	Sensitivity	Precision	F-score	Sensitivity	Precision	F-score
1	14	24	2	29	1	24	5	14	59	1	0	37	64	14	0	24	64	19	5	19	59	2	0	36	64	0.631579	0.827586	0.716418	0.0263158	1	0.0512821	0.368421	1	0.538462	0.5	0.791667	0.612903	0.0526316	1	0.1
2	18	26	13	37	3	29	8	9	56	3	0	35	64	18	0	20	64	21	5	17	59	8	5	30	59	0.763158	0.783784	0.773333	0.0789474	1	0.146341	0.473684	1	0.642857	0.552632	0.807692	0.65625	0.210526	0.615385	0.313725
3	21	26	13	38	3	30	8	8	56	3	0	35	64	21	0	17	64	21	5	17	59	8	5	30	59	0.789474	0.789474	0.789474	0.0789474	1	0.146341	0.552632	1	0.711864	0.552632	0.807692	0.65625	0.210526	0.615385	0.313725
4	21	26	13	38	3	30	8	8	56	3	0	35	64	21	0	17	64	21	5	17	59	8	5	30	59	0.789474	0.789474	0.789474	0.0789474	1	0.146341	0.552632	1	0.711864	0.552632	0.807692	0.65625	0.210526	0.615385	0.313725
5	21	26	13	38	3	30	8	8	56	3	0	35	64	21	0	17	64	21	5	17	59	8	5	30	59	0.789474	0.789474	0.789474	0.0789474	1	0.146341	0.552632	1	0.711864	0.552632	0.807692	0.65625	0.210526	0.615385	0.313725
6	21	26	13	38	3	30	8	8	56	3	0	35	64	21	0	17	64	21	5	17	59	8	5	30	59	0.789474	0.789474	0.789474	0.0789474	1	0.146341	0.552632	1	0.711864	0.552632	0.807692	0.65625	0.210526	0.615385	0.313725
7	23	26	13	38	4	30	8	8	56	3	1	35	63	22	1	16	63	21	5	17	59	8	5	30	59	0.789474	0.789474	0.789474	0.0789474	0.75	0.142857	0.578947	0.956522	0.721311	0.552632	0.807692	0.65625	0.210526	0.615385	0.313725
8	23	26	13	38	4	30	8	8	56	3	1	35	63	22	1	16	63	21	5	17	59	8	5	30	59	0.789474	0.789474	0.789474	0.0789474	0.75	0.142857	0.578947	0.956522	0.721311	0.552632	0.807692	0.65625	0.210526	0.615385	0.313725
9	26	27	13	38	5	30	8	8	56	4	1	34	63	25	1	13	63	22	5	16	59	8	5	30	59	0.789474	0.789474	0.789474	0.105263	0.8	0.186047	0.657895	0.961538	0.78125	0.578947	0.814815	0.676923	0.210526	0.615385	0.313725
10	27	27	13	39	5	31	8	7	56	4	1	34	63	26	1	12	63	22	5	16	59	8	5	30	59	0.815789	0.794872	0.805195	0.105263	0.8	0.186047	0.684211	0.962963	0.8	0.578947	0.814815	0.676923	0.210526	0.615385	0.313725
																										Union			Intersect			KEGG			GO			OMIM
n	KEGG	GO	OMIM	Union	Intersect	TP	FP	FN	TN	TP	FP	FN	TN	TP	FP	FN	TN	TP	FP	FN	TN	TP	FP	FN	TN	Sensitivity	Precision	F-score	Sensitivity	Precision	F-score	Sensitivity	Precision	F-score	Sensitivity	Precision	F-score	Sensitivity	Precision	F-score
1	17	3	2	19	0	18	1	20	63	0	0	38	64	16	1	22	63	3	0	35	64	2	0	36	64	0.473684	0.947368	0.631579	0	N/A	N/A	0.421053	0.941176	0.581818	0.0789474	1	0.146341	0.0526316	1	0.1
2	19	3	3	19	0	18	1	20	63	0	0	38	64	18	1	20	63	3	0	35	64	3	0	35	64	0.473684	0.947368	0.631579	0	N/A	N/A	0.473684	0.947368	0.631579	0.0789474	1	0.146341	0.0789474	1	0.146341
3	22	13	11	30	3	26	4	12	60	3	0	35	64	21	1	17	63	12	1	26	63	9	2	29	62	0.684211	0.866667	0.764706	0.0789474	1	0.146341	0.552632	0.954545	0.7	0.315789	0.923077	0.470588	0.236842	0.818182	0.367347
4	22	17	11	32	3	28	4	10	60	3	0	35	64	21	1	17	63	16	1	22	63	9	2	29	62	0.736842	0.875	0.8	0.0789474	1	0.146341	0.552632	0.954545	0.7	0.421053	0.941176	0.581818	0.236842	0.818182	0.367347
5	22	17	11	32	3	28	4	10	60	3	0	35	64	21	1	17	63	16	1	22	63	9	2	29	62	0.736842	0.875	0.8	0.0789474	1	0.146341	0.552632	0.954545	0.7	0.421053	0.941176	0.581818	0.236842	0.818182	0.367347
6	22	25	11	36	4	30	6	8	58	4	0	34	64	21	1	17	63	21	4	17	60	9	2	29	62	0.789474	0.833333	0.810811	0.105263	1	0.190476	0.552632	0.954545	0.7	0.552632	0.84	0.666667	0.236842	0.818182	0.367347
7	22	25	11	36	4	30	6	8	58	4	0	34	64	21	1	17	63	21	4	17	60	9	2	29	62	0.789474	0.833333	0.810811	0.105263	1	0.190476	0.552632	0.954545	0.7	0.552632	0.84	0.666667	0.236842	0.818182	0.367347
8	26	25	11	37	5	31	6	7	58	5	0	33	64	25	1	13	63	21	4	17	60	9	2	29	62	0.815789	0.837838	0.826667	0.131579	1	0.232558	0.657895	0.961538	0.78125	0.552632	0.84	0.666667	0.236842	0.818182	0.367347
9	26	25	11	37	5	31	6	7	58	5	0	33	64	25	1	13	63	21	4	17	60	9	2	29	62	0.815789	0.837838	0.826667	0.131579	1	0.232558	0.657895	0.961538	0.78125	0.552632	0.84	0.666667	0.236842	0.818182	0.367347
10	26	26	11	37	5	31	6	7	58	5	0	33	64	25	1	13	63	22	4	16	60	9	2	29	62	0.815789	0.837838	0.826667	0.131579	1	0.232558	0.657895	0.961538	0.78125	0.578947	0.846154	0.6875	0.236842	0.818182	0.367347
																										Union			Intersect			KEGG			GO			OMIM
n	KEGG	GO	OMIM	Union	Intersect	TP	FP	FN	TN	TP	FP	FN	TN	TP	FP	FN	TN	TP	FP	FN	TN	TP	FP	FN	TN	Sensitivity	Precision	F-score	Sensitivity	Precision	F-score	Sensitivity	Precision	F-score	Sensitivity	Precision	F-score	Sensitivity	Precision	F-score
1	17	3	2	19	0	18	1	20	63	0	0	38	64	16	1	22	63	3	0	35	64	2	0	36	64	0.473684	0.947368	0.631579	0	N/A	N/A	0.421053	0.941176	0.581818	0.0789474	1	0.146341	0.0526316	1	0.1
2	19	14	3	24	2	21	3	17	61	2	0	36	64	18	1	20	63	12	2	26	62	3	0	35	64	0.552632	0.875	0.677419	0.0526316	1	0.1	0.473684	0.947368	0.631579	0.315789	0.857143	0.461538	0.0789474	1	0.146341
3	23	14	11	31	3	26	5	12	59	3	0	35	64	21	2	17	62	12	2	26	62	9	2	29	62	0.684211	0.83871	0.753623	0.0789474	1	0.146341	0.552632	0.913043	0.688525	0.315789	0.857143	0.461538	0.236842	0.818182	0.367347
4	23	14	11	31	3	26	5	12	59	3	0	35	64	21	2	17	62	12	2	26	62	9	2	29	62	0.684211	0.83871	0.753623	0.0789474	1	0.146341	0.552632	0.913043	0.688525	0.315789	0.857143	0.461538	0.236842	0.818182	0.367347
5	23	18	11	33	3	28	5	10	59	3	0	35	64	21	2	17	62	16	2	22	62	9	2	29	62	0.736842	0.848485	0.788732	0.0789474	1	0.146341	0.552632	0.913043	0.688525	0.421053	0.888889	0.571429	0.236842	0.818182	0.367347
6	23	19	11	33	3	28	5	10	59	3	0	35	64	21	2	17	62	17	2	21	62	9	2	29	62	0.736842	0.848485	0.788732	0.0789474	1	0.146341	0.552632	0.913043	0.688525	0.447368	0.894737	0.596491	0.236842	0.818182	0.367347
7	23	24	11	35	4	30	5	8	59	4	0	34	64	21	2	17	62	22	2	16	62	9	2	29	62	0.789474	0.857143	0.821918	0.105263	1	0.190476	0.552632	0.913043	0.688525	0.578947	0.916667	0.709677	0.236842	0.818182	0.367347
8	27	24	11	36	5	31	5	7	59	5	0	33	64	25	2	13	62	22	2	16	62	9	2	29	62	0.815789	0.861111	0.837838	0.131579	1	0.232558	0.657895	0.925926	0.769231	0.578947	0.916667	0.709677	0.236842	0.818182	0.367347
9	27	24	11	36	5	31	5	7	59	5	0	33	64	25	2	13	62	22	2	16	62	9	2	29	62	0.815789	0.861111	0.837838	0.131579	1	0.232558	0.657895	0.925926	0.769231	0.578947	0.916667	0.709677	0.236842	0.818182	0.367347
10	27	24	11	36	5	31	5	7	59	5	0	33	64	25	2	13	62	22	2	16	62	9	2	29	62	0.815789	0.861111	0.837838	0.131579	1	0.232558	0.657895	0.925926	0.769231	0.578947	0.916667	0.709677	0.236842	0.818182	0.367347
[truncated: 7 more columns]

## Sheet: cirr
Test1						Union				Intersect				KEGG				GO				OMIM				Union			Intersect			KEGG			GO			OMIM				Union			Intersect			KEGG
n	KEGG	GO	OMIM	Union	Intersect	TP	FP	FN	TN	TP	FP	FN	TN	TP	FP	FN	TN	TP	FP	FN	TN	TP	FP	FN	TN	Sensitivity	Precision	F-score	Sensitivity	Precision	F-score	Sensitivity	Precision	F-score	Sensitivity	Precision	F-score	Sensitivity	Precision	F-score		Sensitivity (S)	Precision (P)	F-score (F)	Sensitivity (S)	Precision (P)	F-score (F)	Sensitivity (S)	Precision (P)
1	8	11	2	14	2	10	4	20	56	2	0	28	60	8	0	22	60	7	4	23	56	2	0	28	60	0.333333	0.714286	0.454545	0.0666667	1	0.125	0.266667	1	0.421053	0.233333	0.636364	0.341463	0.0666667	1	0.125		0.35	0.898203	0.499436	0.03	1	0.0817972	0.266667	0.977778
2	9	12	4	16	2	12	4	18	56	2	0	28	60	9	0	21	60	8	4	22	56	4	0	26	60	0.4	0.75	0.521739	0.0666667	1	0.125	0.3	1	0.461538	0.266667	0.666667	0.380952	0.133333	1	0.235294		0.443333	0.903039	0.59221	0.03	1	0.0817972	0.32	0.981667
3	10	12	20	26	5	22	4	8	56	5	0	25	60	10	0	20	60	8	4	22	56	18	2	12	58	0.733333	0.846154	0.785714	0.166667	1	0.285714	0.333333	1	0.5	0.266667	0.666667	0.380952	0.6	0.9	0.72		0.713333	0.855054	0.775484	0.123333	1	0.215679	0.36	0.983217
4	12	14	20	27	6	23	4	7	56	6	0	24	60	12	0	18	60	10	4	20	56	18	2	12	58	0.766667	0.851852	0.807018	0.2	1	0.333333	0.4	1	0.571429	0.333333	0.714286	0.454545	0.6	0.9	0.72		0.783333	0.845313	0.812064	0.16	1	0.27507	0.403333	0.971282
5	13	15	20	28	6	24	4	6	56	6	0	24	60	13	0	17	60	11	4	19	56	18	2	12	58	0.8	0.857143	0.827586	0.2	1	0.333333	0.433333	1	0.604651	0.366667	0.733333	0.488889	0.6	0.9	0.72		0.81	0.844016	0.825496	0.163333	0.98	0.27944	0.43	0.937619
6	13	15	20	28	6	24	4	6	56	6	0	24	60	13	0	17	60	11	4	19	56	18	2	12	58	0.8	0.857143	0.827586	0.2	1	0.333333	0.433333	1	0.604651	0.366667	0.733333	0.488889	0.6	0.9	0.72		0.833333	0.845515	0.837863	0.176667	0.98	0.299048	0.453333	0.935357
7	14	15	20	29	6	25	4	5	56	6	0	24	60	14	0	16	60	11	4	19	56	18	2	12	58	0.833333	0.862069	0.847458	0.2	1	0.333333	0.466667	1	0.636364	0.366667	0.733333	0.488889	0.6	0.9	0.72		0.85	0.847783	0.847733	0.183333	0.983333	0.30873	0.466667	0.935833
8	14	15	20	29	6	25	4	5	56	6	0	24	60	14	0	16	60	11	4	19	56	18	2	12	58	0.833333	0.862069	0.847458	0.2	1	0.333333	0.466667	1	0.636364	0.366667	0.733333	0.488889	0.6	0.9	0.72		0.853333	0.841209	0.845734	0.19	0.983333	0.317997	0.466667	0.935833
9	19	15	20	34	6	30	4	0	56	6	0	24	60	19	0	11	60	11	4	19	56	18	2	12	58	1	0.882353	0.9375	0.2	1	0.333333	0.633333	1	0.77551	0.366667	0.733333	0.488889	0.6	0.9	0.72		0.976667	0.855178	0.910573	0.193333	0.983333	0.322758	0.6	0.946786
10	19	15	20	34	6	30	4	0	56	6	0	24	60	19	0	11	60	11	4	19	56	18	2	12	58	1	0.882353	0.9375	0.2	1	0.333333	0.633333	1	0.77551	0.366667	0.733333	0.488889	0.6	0.9	0.72		0.99	0.854494	0.9163	0.193333	0.983333	0.322758	0.623333	0.940842
																										Union			Intersect			KEGG			GO			OMIM
n	KEGG	GO	OMIM	Union	Intersect	TP	FP	FN	TN	TP	FP	FN	TN	TP	FP	FN	TN	TP	FP	FN	TN	TP	FP	FN	TN	Sensitivity	Precision	F-score	Sensitivity	Precision	F-score	Sensitivity	Precision	F-score	Sensitivity	Precision	F-score	Sensitivity	Precision	F-score		Stdev (S)	Stdev (P)	Stdev (F)	Stdev (S)	Stdev (P)	Stdev (F)	Stdev (S)	Stdev (P)
1	9	10	2	16	1	13	3	17	61	1	0	29	64	8	1	22	63	8	2	22	62	2	0	28	64	0.433333	0.8125	0.565217	0.0333333	1	0.0645161	0.266667	0.888889	0.410256	0.266667	0.8	0.4	0.0666667	1	0.125		0.0503077	0.100361	0.0459381	0.0245955	0	0.0295131	0	0.0468486
2	10	10	4	18	1	15	3	15	61	1	0	29	64	9	1	21	63	8	2	22	62	4	0	26	64	0.5	0.833333	0.625	0.0333333	1	0.0645161	0.3	0.9	0.45	0.266667	0.8	0.4	0.133333	1	0.235294		0.0386501	0.0987084	0.039108	0.0245955	0	0.0295131	0.0322031	0.0388492
3	11	10	6	20	1	16	4	14	60	1	0	29	64	10	1	20	63	8	2	22	62	5	1	25	63	0.533333	0.8	0.64	0.0333333	1	0.0645161	0.333333	0.909091	0.487805	0.266667	0.8	0.4	0.166667	0.833333	0.277778		0.0958394	0.052848	0.0753295	0.0545464	0	0.0894666	0.0344265	0.0355354
4	13	13	22	31	4	25	6	5	58	4	0	26	64	12	1	18	63	11	2	19	62	19	3	11	61	0.833333	0.806452	0.819672	0.133333	1	0.235294	0.4	0.923077	0.55814	0.366667	0.846154	0.511628	0.633333	0.863636	0.730769		0.0283279	0.0496468	0.0228753	0.0262937	0	0.0388314	0.0105409	0.0487224
5	15	14	22	32	5	26	6	4	58	5	0	25	64	13	2	17	62	12	2	18	62	19	3	11	61	0.866667	0.8125	0.83871	0.166667	1	0.285714	0.433333	0.866667	0.577778	0.4	0.857143	0.545455	0.633333	0.863636	0.730769		0.0274424	0.049645	0.0213503	0.0245955	0.0632456	0.0372546	0.0105409	0.0496117
6	16	14	22	33	5	27	6	3	58	5	0	25	64	14	2	16	62	12	2	18	62	19	3	11	61	0.9	0.818182	0.857143	0.166667	1	0.285714	0.466667	0.875	0.608696	0.4	0.857143	0.545455	0.633333	0.863636	0.730769		0.0351364	0.0516336	0.0222683	0.0224983	0.0632456	0.0342504	0.0172133	0.0511244
7	16	14	22	33	5	27	6	3	58	5	0	25	64	14	2	16	62	12	2	18	62	19	3	11	61	0.9	0.818182	0.857143	0.166667	1	0.285714	0.466667	0.875	0.608696	0.4	0.857143	0.545455	0.633333	0.863636	0.730769		0.0235702	0.0515508	0.0223619	0.0175682	0.0527046	0.0260417	0	0.0510764
8	16	16	22	34	6	27	7	3	57	6	0	24	64	14	2	16	62	13	3	17	61	19	3	11	61	0.9	0.794118	0.84375	0.2	1	0.333333	0.466667	0.875	0.608696	0.433333	0.8125	0.565217	0.633333	0.863636	0.730769		0.0233069	0.0598038	0.0261548	0.0224983	0.0527046	0.032602	0	0.0510764
9	16	16	22	34	6	27	7	3	57	6	0	24	64	14	2	16	62	13	3	17	61	19	3	11	61	0.9	0.794118	0.84375	0.2	1	0.333333	0.466667	0.875	0.608696	0.433333	0.8125	0.565217	0.633333	0.863636	0.730769		0.0498145	0.0600028	0.0442463	0.0210819	0.0527046	0.0307902	0.0702728	0.0439601
10	16	16	22	34	6	27	7	3	57	6	0	24	64	14	2	16	62	13	3	17	61	19	3	11	61	0.9	0.794118	0.84375	0.2	1	0.333333	0.466667	0.875	0.608696	0.433333	0.8125	0.565217	0.633333	0.863636	0.730769		0.0316228	0.0619104	0.0425745	0.0210819	0.0527046	0.0307902	0.0567646	0.0499734
																										Union			Intersect			KEGG			GO			OMIM				# Average of 10 repeats
n	KEGG	GO	OMIM	Union	Intersect	TP	FP	FN	TN	TP	FP	FN	TN	TP	FP	FN	TN	TP	FP	FN	TN	TP	FP	FN	TN	Sensitivity	Precision	F-score	Sensitivity	Precision	F-score	Sensitivity	Precision	F-score	Sensitivity	Precision	F-score	Sensitivity	Precision	F-score
1	8	9	2	12	1	10	2	20	62	1	0	29	64	8	0	22	64	7	2	23	62	2	0	28	64	0.333333	0.833333	0.47619	0.0333333	1	0.0645161	0.266667	1	0.421053	0.233333	0.777778	0.358974	0.0666667	1	0.125
2	11	9	4	15	1	13	2	17	62	1	0	29	64	11	0	19	64	7	2	23	62	4	0	26	64	0.433333	0.866667	0.577778	0.0333333	1	0.0645161	0.366667	1	0.536585	0.233333	0.777778	0.358974	0.133333	1	0.235294
3	12	9	20	27	4	23	4	7	60	4	0	26	64	12	0	18	64	7	2	23	62	18	2	12	62	0.766667	0.851852	0.807018	0.133333	1	0.235294	0.4	1	0.571429	0.233333	0.777778	0.358974	0.6	0.9	0.72
4	12	9	20	27	4	23	4	7	60	4	0	26	64	12	0	18	64	7	2	23	62	18	2	12	62	0.766667	0.851852	0.807018	0.133333	1	0.235294	0.4	1	0.571429	0.233333	0.777778	0.358974	0.6	0.9	0.72
5	14	9	20	28	4	24	4	6	60	4	0	26	64	13	1	17	63	7	2	23	62	18	2	12	62	0.8	0.857143	0.827586	0.133333	1	0.235294	0.433333	0.928571	0.590909	0.233333	0.777778	0.358974	0.6	0.9	0.72
6	14	10	20	28	5	24	4	6	60	5	0	25	64	13	1	17	63	8	2	22	62	18	2	12	62	0.8	0.857143	0.827586	0.166667	1	0.285714	0.433333	0.928571	0.590909	0.266667	0.8	0.4	0.6	0.9	0.72
7	15	12	20	29	6	25	4	5	60	6	0	24	64	14	1	16	63	10	2	20	62	18	2	12	62	0.833333	0.862069	0.847458	0.2	1	0.333333	0.466667	0.933333	0.622222	0.333333	0.833333	0.47619	0.6	0.9	0.72
8	15	12	20	29	6	25	4	5	60	6	0	24	64	14	1	16	63	10	2	20	62	18	2	12	62	0.833333	0.862069	0.847458	0.2	1	0.333333	0.466667	0.933333	0.622222	0.333333	0.833333	0.47619	0.6	0.9	0.72
9	20	13	20	34	6	30	4	0	60	6	0	24	64	19	1	11	63	11	2	19	62	18	2	12	62	1	0.882353	0.9375	0.2	1	0.333333	0.633333	0.95	0.76	0.366667	0.846154	0.511628	0.6	0.9	0.72
10	20	14	20	34	6	30	4	0	60	6	0	24	64	19	1	11	63	12	2	18	62	18	2	12	62	1	0.882353	0.9375	0.2	1	0.333333	0.633333	0.95	0.76	0.4	0.857143	0.545455	0.6	0.9	0.72
																										Union			Intersect			KEGG			GO			OMIM
n	KEGG	GO	OMIM	Union	Intersect	TP	FP	FN	TN	TP	FP	FN	TN	TP	FP	FN	TN	TP	FP	FN	TN	TP	FP	FN	TN	Sensitivity	Precision	F-score	Sensitivity	Precision	F-score	Sensitivity	Precision	F-score	Sensitivity	Precision	F-score	Sensitivity	Precision	F-score
1	8	8	2	11	1	10	1	20	63	1	0	29	64	8	0	22	64	7	1	23	63	2	0	28	64	0.333333	0.909091	0.487805	0.0333333	1	0.0645161	0.266667	1	0.421053	0.233333	0.875	0.368421	0.0666667	1	0.125
2	9	10	4	15	1	14	1	16	63	1	0	29	64	9	0	21	64	9	1	21	63	4	0	26	64	0.466667	0.933333	0.622222	0.0333333	1	0.0645161	0.3	1	0.461538	0.3	0.9	0.45	0.133333	1	0.235294
3	10	10	20	25	4	23	2	7	62	4	0	26	64	10	0	20	64	9	1	21	63	18	2	12	62	0.766667	0.92	0.836364	0.133333	1	0.235294	0.333333	1	0.5	0.3	0.9	0.45	0.6	0.9	0.72
4	12	10	20	25	5	23	2	7	62	5	0	25	64	12	0	18	64	9	1	21	63	18	2	12	62	0.766667	0.92	0.836364	0.166667	1	0.285714	0.4	1	0.571429	0.3	0.9	0.45	0.6	0.9	0.72
5	13	10	20	26	5	24	2	6	62	5	0	25	64	13	0	17	64	9	1	21	63	18	2	12	62	0.8	0.923077	0.857143	0.166667	1	0.285714	0.433333	1	0.604651	0.3	0.9	0.45	0.6	0.9	0.72
6	13	10	20	26	5	24	2	6	62	5	0	25	64	13	0	17	64	9	1	21	63	18	2	12	62	0.8	0.923077	0.857143	0.166667	1	0.285714	0.433333	1	0.604651	0.3	0.9	0.45	0.6	0.9	0.72
7	14	10	20	27	5	25	2	5	62	5	0	25	64	14	0	16	64	9	1	21	63	18	2	12	62	0.833333	0.925926	0.877193	0.166667	1	0.285714	0.466667	1	0.636364	0.3	0.9	0.45	0.6	0.9	0.72
8	14	10	20	27	5	25	2	5	62	5	0	25	64	14	0	16	64	9	1	21	63	18	2	12	62	0.833333	0.925926	0.877193	0.166667	1	0.285714	0.466667	1	0.636364	0.3	0.9	0.45	0.6	0.9	0.72
9	19	10	20	32	5	30	2	0	62	5	0	25	64	19	0	11	64	9	1	21	63	18	2	12	62	1	0.9375	0.967742	0.166667	1	0.285714	0.633333	1	0.77551	0.3	0.9	0.45	0.6	0.9	0.72
10	19	10	20	32	5	30	2	0	62	5	0	25	64	19	0	11	64	9	1	21	63	18	2	12	62	1	0.9375	0.967742	0.166667	1	0.285714	0.633333	1	0.77551	0.3	0.9	0.45	0.6	0.9	0.72
																										Union			Intersect			KEGG			GO			OMIM
n	KEGG	GO	OMIM	Union	Intersect	TP	FP	FN	TN	TP	FP	FN	TN	TP	FP	FN	TN	TP	FP	FN	TN	TP	FP	FN	TN	Sensitivity	Precision	F-score	Sensitivity	Precision	F-score	Sensitivity	Precision	F-score	Sensitivity	Precision	F-score	Sensitivity	Precision	F-score
1	8	4	2	9	0	9	0	21	64	0	0	30	64	8	0	22	64	4	0	26	64	2	0	28	64	0.3	1	0.461538	0	N/A	N/A	0.266667	1	0.421053	0.133333	1	0.235294	0.0666667	1	0.125
2	11	4	4	13	0	13	0	17	64	0	0	30	64	11	0	19	64	4	0	26	64	4	0	26	64	0.433333	1	0.604651	0	N/A	N/A	0.366667	1	0.536585	0.133333	1	0.235294	0.133333	1	0.235294
3	12	8	20	25	5	23	2	7	62	5	0	25	64	12	0	18	64	8	0	22	64	18	2	12	62	0.766667	0.92	0.836364	0.166667	1	0.285714	0.4	1	0.571429	0.266667	1	0.421053	0.6	0.9	0.72
4	12	8	20	25	5	23	2	7	62	5	0	25	64	12	0	18	64	8	0	22	64	18	2	12	62	0.766667	0.92	0.836364	0.166667	1	0.285714	0.4	1	0.571429	0.266667	1	0.421053	0.6	0.9	0.72
5	12	9	20	25	5	23	2	7	62	5	0	25	64	12	0	18	64	9	0	21	64	18	2	12	62	0.766667	0.92	0.836364	0.166667	1	0.285714	0.4	1	0.571429	0.3	1	0.461538	0.6	0.9	0.72
6	13	11	20	26	6	24	2	6	62	6	0	24	64	13	0	17	64	11	0	19	64	18	2	12	62	0.8	0.923077	0.857143	0.2	1	0.333333	0.433333	1	0.604651	0.366667	1	0.536585	0.6	0.9	0.72
7	14	11	20	27	6	25	2	5	62	6	0	24	64	14	0	16	64	11	0	19	64	18	2	12	62	0.833333	0.925926	0.877193	0.2	1	0.333333	0.466667	1	0.636364	0.366667	1	0.536585	0.6	0.9	0.72
8	14	11	20	27	6	25	2	5	62	6	0	24	64	14	0	16	64	11	0	19	64	18	2	12	62	0.833333	0.925926	0.877193	0.2	1	0.333333	0.466667	1	0.636364	0.366667	1	0.536585	0.6	0.9	0.72
9	19	11	20	32	6	30	2	0	62	6	0	24	64	19	0	11	64	11	0	19	64	18	2	12	62	1	0.9375	0.967742	0.2	1	0.333333	0.633333	1	0.77551	0.366667	1	0.536585	0.6	0.9	0.72
10	19	11	20	32	6	30	2	0	62	6	0	24	64	19	0	11	64	11	0	19	64	18	2	12	62	1	0.9375	0.967742	0.2	1	0.333333	0.633333	1	0.77551	0.366667	1	0.536585	0.6	0.9	0.72
																										Union			Intersect			KEGG			GO			OMIM
n	KEGG	GO	OMIM	Union	Intersect	TP	FP	FN	TN	TP	FP	FN	TN	TP	FP	FN	TN	TP	FP	FN	TN	TP	FP	FN	TN	Sensitivity	Precision	F-score	Sensitivity	Precision	F-score	Sensitivity	Precision	F-score	Sensitivity	Precision	F-score	Sensitivity	Precision	F-score
1	8	12	2	15	2	13	2	17	62	2	0	28	64	8	0	22	64	10	2	20	62	2	0	28	64	0.433333	0.866667	0.577778	0.0666667	1	0.125	0.266667	1	0.421053	0.333333	0.833333	0.47619	0.0666667	1	0.125
2	9	12	4	17	2	15	2	15	62	2	0	28	64	9	0	21	64	10	2	20	62	4	0	26	64	0.5	0.882353	0.638298	0.0666667	1	0.125	0.3	1	0.461538	0.333333	0.833333	0.47619	0.133333	1	0.235294
3	12	12	22	29	6	23	6	7	58	6	0	24	64	12	0	18	64	10	2	20	62	18	4	12	60	0.766667	0.793103	0.779661	0.2	1	0.333333	0.4	1	0.571429	0.333333	0.833333	0.47619	0.6	0.818182	0.692308
4	12	13	22	29	6	23	6	7	58	6	0	24	64	12	0	18	64	11	2	19	62	18	4	12	60	0.766667	0.793103	0.779661	0.2	1	0.333333	0.4	1	0.571429	0.366667	0.846154	0.511628	0.6	0.818182	0.692308
5	14	13	22	31	6	24	7	6	57	6	0	24	64	13	1	17	63	11	2	19	62	18	4	12	60	0.8	0.774194	0.786885	0.2	1	0.333333	0.433333	0.928571	0.590909	0.366667	0.846154	0.511628	0.6	0.818182	0.692308
6	16	13	22	33	6	25	8	5	56	6	0	24	64	14	2	16	62	11	2	19	62	18	4	12	60	0.833333	0.757576	0.793651	0.2	1	0.333333	0.466667	0.875	0.608696	0.366667	0.846154	0.511628	0.6	0.818182	0.692308
7	16	14	22	34	6	26	8	4	56	6	0	24	64	14	2	16	62	12	2	18	62	18	4	12	60	0.866667	0.764706	0.8125	0.2	1	0.333333	0.466667	0.875	0.608696	0.4	0.857143	0.545455	0.6	0.818182	0.692308
8	16	18	22	35	7	26	9	4	55	7	0	23	64	14	2	16	62	14	4	16	60	18	4	12	60	0.866667	0.742857	0.8	0.233333	1	0.378378	0.466667	0.875	0.608696	0.466667	0.777778	0.583333	0.6	0.818182	0.692308
9	21	19	22	40	7	30	10	0	54	7	0	23	64	19	2	11	62	14	5	16	59	18	4	12	60	1	0.75	0.857143	0.233333	1	0.378378	0.633333	0.904762	0.745098	0.466667	0.736842	0.571429	0.6	0.818182	0.692308
10	23	19	22	40	7	30	10	0	54	7	0	23	64	20	3	10	61	14	5	16	59	18	4	12	60	1	0.75	0.857143	0.233333	1	0.378378	0.666667	0.869565	0.754717	0.466667	0.736842	0.571429	0.6	0.818182	0.692308
																										Union			Intersect			KEGG			GO			OMIM
n	KEGG	GO	OMIM	Union	Intersect	TP	FP	FN	TN	TP	FP	FN	TN	TP	FP	FN	TN	TP	FP	FN	TN	TP	FP	FN	TN	Sensitivity	Precision	F-score	Sensitivity	Precision	F-score	Sensitivity	Precision	F-score	Sensitivity	Precision	F-score	Sensitivity	Precision	F-score
1	8	6	2	11	1	11	0	19	64	1	0	29	64	8	0	22	64	6	0	24	64	2	0	28	64	0.366667	1	0.536585	0.0333333	1	0.0645161	0.266667	1	0.421053	0.2	1	0.333333	0.0666667	1	0.125
2	9	8	4	14	1	14	0	16	64	1	0	29	64	9	0	21	64	8	0	22	64	4	0	26	64	0.466667	1	0.636364	0.0333333	1	0.0645161	0.3	1	0.461538	0.266667	1	0.421053	0.133333	1	0.235294
3	10	8	21	26	4	23	3	7	61	4	0	26	64	10	0	20	64	8	0	22	64	18	3	12	61	0.766667	0.884615	0.821429	0.133333	1	0.235294	0.333333	1	0.5	0.266667	1	0.421053	0.6	0.857143	0.705882
4	15	13	21	31	5	25	6	5	58	5	0	25	64	13	2	17	62	12	1	18	63	18	3	12	61	0.833333	0.806452	0.819672	0.166667	1	0.285714	0.433333	0.866667	0.577778	0.4	0.923077	0.55814	0.6	0.857143	0.705882
5	15	13	21	31	5	25	6	5	58	5	0	25	64	13	2	17	62	12	1	18	63	18	3	12	61	0.833333	0.806452	0.819672	0.166667	1	0.285714	0.433333	0.866667	0.577778	0.4	0.923077	0.55814	0.6	0.857143	0.705882
6	16	13	21	32	5	26	6	4	58	5	0	25	64	14	2	16	62	12	1	18	63	18	3	12	61	0.866667	0.8125	0.83871	0.166667	1	0.285714	0.466667	0.875	0.608696	0.4	0.923077	0.55814	0.6	0.857143	0.705882
7	16	13	21	32	5	26	6	4	58	5	0	25	64	14	2	16	62	12	1	18	63	18	3	12	61	0.866667	0.8125	0.83871	0.166667	1	0.285714	0.466667	0.875	0.608696	0.4	0.923077	0.55814	0.6	0.857143	0.705882
8	16	13	21	32	5	26	6	4	58	5	0	25	64	14	2	16	62	12	1	18	63	18	3	12	61	0.866667	0.8125	0.83871	0.166667	1	0.285714	0.466667	0.875	0.608696	0.4	0.923077	0.55814	0.6	0.857143	0.705882
9	21	13	21	36	5	30	6	0	58	5	0	25	64	19	2	11	62	12	1	18	63	18	3	12	61	1	0.833333	0.909091	0.166667	1	0.285714	0.633333	0.904762	0.745098	0.4	0.923077	0.55814	0.6	0.857143	0.705882
10	21	14	21	37	5	30	7	0	57	5	0	25	64	19	2	11	62	12	2	18	62	18	3	12	61	1	0.810811	0.895522	0.166667	1	0.285714	0.633333	0.904762	0.745098	0.4	0.857143	0.545455	0.6	0.857143	0.705882
																										Union			Intersect			KEGG			GO			OMIM
n	KEGG	GO	OMIM	Union	Intersect	TP	FP	FN	TN	TP	FP	FN	TN	TP	FP	FN	TN	TP	FP	FN	TN	TP	FP	FN	TN	Sensitivity	Precision	F-score	Sensitivity	Precision	F-score	Sensitivity	Precision	F-score	Sensitivity	Precision	F-score	Sensitivity	Precision	F-score
1	8	4	2	9	0	9	0	21	64	0	0	30	64	8	0	22	64	4	0	26	64	2	0	28	64	0.3	1	0.461538	0	N/A	N/A	0.266667	1	0.421053	0.133333	1	0.235294	0.0666667	1	0.125
2	9	4	4	12	0	12	0	18	64	0	0	30	64	9	0	21	64	4	0	26	64	4	0	26	64	0.4	1	0.571429	0	N/A	N/A	0.3	1	0.461538	0.133333	1	0.235294	0.133333	1	0.235294
3	10	8	20	25	4	23	2	7	62	4	0	26	64	10	0	20	64	8	0	22	64	18	2	12	62	0.766667	0.92	0.836364	0.133333	1	0.235294	0.333333	1	0.5	0.266667	1	0.421053	0.6	0.9	0.72
4	12	14	20	27	5	24	3	6	61	5	0	25	64	12	0	18	64	12	2	18	62	18	2	12	62	0.8	0.888889	0.842105	0.166667	1	0.285714	0.4	1	0.571429	0.4	0.857143	0.545455	0.6	0.9	0.72
5	14	14	20	29	5	25	4	5	60	5	0	25	64	13	1	17	63	12	2	18	62	18	2	12	62	0.833333	0.862069	0.847458	0.166667	1	0.285714	0.433333	0.928571	0.590909	0.4	0.857143	0.545455	0.6	0.9	0.72
6	15	16	20	30	6	26	4	4	60	6	0	24	64	14	1	16	63	13	3	17	61	18	2	12	62	0.866667	0.866667	0.866667	0.2	1	0.333333	0.466667	0.933333	0.622222	0.433333	0.8125	0.565217	0.6	0.9	0.72
7	15	16	20	30	6	26	4	4	60	6	0	24	64	14	1	16	63	13	3	17	61	18	2	12	62	0.866667	0.866667	0.866667	0.2	1	0.333333	0.466667	0.933333	0.622222	0.433333	0.8125	0.565217	0.6	0.9	0.72
8	15	16	20	30	6	26	4	4	60	6	0	24	64	14	1	16	63	13	3	17	61	18	2	12	62	0.866667	0.866667	0.866667	0.2	1	0.333333	0.466667	0.933333	0.622222	0.433333	0.8125	0.565217	0.6	0.9	0.72
9	15	16	20	30	6	26	4	4	60	6	0	24	64	14	1	16	63	13	3	17	61	18	2	12	62	0.866667	0.866667	0.866667	0.2	1	0.333333	0.466667	0.933333	0.622222	0.433333	0.8125	0.565217	0.6	0.9	0.72
10	20	16	20	34	6	30	4	0	60	6	0	24	64	19	1	11	63	13	3	17	61	18	2	12	62	1	0.882353	0.9375	0.2	1	0.333333	0.633333	0.95	0.76	0.433333	0.8125	0.565217	0.6	0.9	0.72
																										Union			Intersect			KEGG			GO			OMIM
n	KEGG	GO	OMIM	Union	Intersect	TP	FP	FN	TN	TP	FP	FN	TN	TP	FP	FN	TN	TP	FP	FN	TN	TP	FP	FN	TN	Sensitivity	Precision	F-score	Sensitivity	Precision	F-score	Sensitivity	Precision	F-score	Sensitivity	Precision	F-score	Sensitivity	Precision	F-score
1	9	7	2	13	1	11	2	19	62	1	0	29	64	8	1	22	63	6	1	24	63	2	0	28	64	0.366667	0.846154	0.511628	0.0333333	1	0.0645161	0.266667	0.888889	0.410256	0.2	0.857143	0.324324	0.0666667	1	0.125
2	12	9	5	17	1	13	4	17	60	1	0	29	64	11	1	19	63	7	2	23	62	4	1	26	63	0.433333	0.764706	0.553191	0.0333333	1	0.0645161	0.366667	0.916667	0.52381	0.233333	0.777778	0.358974	0.133333	0.8	0.228571
3	13	10	7	20	1	16	4	14	60	1	0	29	64	12	1	18	63	8	2	22	62	6	1	24	63	0.533333	0.8	0.64	0.0333333	1	0.0645161	0.4	0.923077	0.55814	0.266667	0.8	0.4	0.2	0.857143	0.324324
4	13	10	21	29	4	23	6	7	58	4	0	26	64	12	1	18	63	8	2	22	62	18	3	12	61	0.766667	0.793103	0.779661	0.133333	1	0.235294	0.4	0.923077	0.55814	0.266667	0.8	0.4	0.6	0.857143	0.705882
5	14	10	21	30	4	24	6	6	58	4	0	26	64	13	1	17	63	8	2	22	62	18	3	12	61	0.8	0.8	0.8	0.133333	1	0.235294	0.433333	0.928571	0.590909	0.266667	0.8	0.4	0.6	0.857143	0.705882
6	15	11	21	31	5	25	6	5	58	5	0	25	64	14	1	16	63	9	2	21	62	18	3	12	61	0.833333	0.806452	0.819672	0.166667	1	0.285714	0.466667	0.933333	0.622222	0.3	0.818182	0.439024	0.6	0.857143	0.705882
7	15	11	21	31	5	25	6	5	58	5	0	25	64	14	1	16	63	9	2	21	62	18	3	12	61	0.833333	0.806452	0.819672	0.166667	1	0.285714	0.466667	0.933333	0.622222	0.3	0.818182	0.439024	0.6	0.857143	0.705882
8	15	12	21	32	5	25	7	5	57	5	0	25	64	14	1	16	63	9	3	21	61	18	3	12	61	0.833333	0.78125	0.806452	0.166667	1	0.285714	0.466667	0.933333	0.622222	0.3	0.75	0.428571	0.6	0.857143	0.705882
9	20	13	21	37	6	30	7	0	57	6	0	24	64	19	1	11	63	10	3	20	61	18	3	12	61	1	0.810811	0.895522	0.2	1	0.333333	0.633333	0.95	0.76	0.333333	0.769231	0.465116	0.6	0.857143	0.705882
10	20	13	21	37	6	30	7	0	57	6	0	24	64	19	1	11	63	10	3	20	61	18	3	12	61	1	0.810811	0.895522	0.2	1	0.333333	0.633333	0.95	0.76	0.333333	0.769231	0.465116	0.6	0.857143	0.705882
																										Union			Intersect			KEGG			GO			OMIM
n	KEGG	GO	OMIM	Union	Intersect	TP	FP	FN	TN	TP	FP	FN	TN	TP	FP	FN	TN	TP	FP	FN	TN	TP	FP	FN	TN	Sensitivity	Precision	F-score	Sensitivity	Precision	F-score	Sensitivity	Precision	F-score	Sensitivity	Precision	F-score	Sensitivity	Precision	F-score
1	8	4	2	9	0	9	0	21	64	0	0	30	64	8	0	22	64	4	0	26	64	2	0	28	64	0.3	1	0.461538	0	N/A	N/A	0.266667	1	0.421053	0.133333	1	0.235294	0.0666667	1	0.125
2	9	4	4	12	0	12	0	18	64	0	0	30	64	9	0	21	64	4	0	26	64	4	0	26	64	0.4	1	0.571429	0	N/A	N/A	0.3	1	0.461538	0.133333	1	0.235294	0.133333	1	0.235294
3	10	7	23	27	3	22	5	8	59	3	0	27	64	10	0	20	64	6	1	24	63	18	5	12	59	0.733333	0.814815	0.77193	0.1	1	0.181818	0.333333	1	0.5	0.2	0.857143	0.324324	0.6	0.782609	0.679245
4	12	7	23	28	4	23	5	7	59	4	0	26	64	12	0	18	64	6	1	24	63	18	5	12	59	0.766667	0.821429	0.793103	0.133333	1	0.235294	0.4	1	0.571429	0.2	0.857143	0.324324	0.6	0.782609	0.679245
5	14	7	23	29	5	24	5	6	59	4	1	26	63	13	1	17	63	6	1	24	63	18	5	12	59	0.8	0.827586	0.813559	0.133333	0.8	0.228571	0.433333	0.928571	0.590909	0.2	0.857143	0.324324	0.6	0.782609	0.679245
6	15	7	23	30	5	25	5	5	59	4	1	26	63	14	1	16	63	6	1	24	63	18	5	12	59	0.833333	0.833333	0.833333	0.133333	0.8	0.228571	0.466667	0.933333	0.622222	0.2	0.857143	0.324324	0.6	0.782609	0.679245
7	15	8	23	30	6	25	5	5	59	5	1	25	63	14	1	16	63	7	1	23	63	18	5	12	59	0.833333	0.833333	0.833333	0.166667	0.833333	0.277778	0.466667	0.933333	0.622222	0.233333	0.875	0.368421	0.6	0.782609	0.679245
8	15	12	23	31	6	26	5	4	59	5	1	25	63	14	1	16	63	11	1	19	63	18	5	12	59	0.866667	0.83871	0.852459	0.166667	0.833333	0.277778	0.466667	0.933333	0.622222	0.366667	0.916667	0.52381	0.6	0.782609	0.679245
9	20	12	23	35	6	30	5	0	59	5	1	25	63	19	1	11	63	11	1	19	63	18	5	12	59	1	0.857143	0.923077	0.166667	0.833333	0.277778	0.633333	0.95	0.76	0.366667	0.916667	0.52381	0.6	0.782609	0.679245
10	22	13	23	35	6	30	5	0	59	5	1	25	63	20	2	10	62	12	1	18	63	18	5	12	59	1	0.857143	0.923077	0.166667	0.833333	0.277778	0.666667	0.909091	0.769231	0.4	0.923077	0.55814	0.6	0.782609	0.679245
[truncated: 7 more columns]

## Sheet: enca
Test1						Union				Intersect				KEGG				GO				OMIM				Union			Intersect			KEGG			GO			OMIM				Union			Intersect			KEGG
n	KEGG	GO	OMIM	Union	Intersect	TP	FP	FN	TN	TP	FP	FN	TN	TP	FP	FN	TN	TP	FP	FN	TN	TP	FP	FN	TN	Sensitivity	Precision	F-score	Sensitivity	Precision	F-score	Sensitivity	Precision	F-score	Sensitivity	Precision	F-score	Sensitivity	Precision	F-score		Sensitivity (S)	Precision (P)	F-score (F)	Sensitivity (S)	Precision (P)	F-score (F)	Sensitivity (S)	Precision (P)
1	7	13	3	17	2	17	0	16	66	2	0	31	66	7	0	26	66	13	0	20	66	3	0	30	66	0.515152	1	0.68	0.0606061	1	0.114286	0.212121	1	0.35	0.393939	1	0.565217	0.0909091	1	0.166667		0.515152	0.97746	0.673741	0.0484848	1	0.114286	0.206061	0.958929
2	13	14	3	17	2	17	0	16	66	2	0	31	66	13	0	20	66	14	0	19	66	3	0	30	66	0.515152	1	0.68	0.0606061	1	0.114286	0.393939	1	0.565217	0.424242	1	0.595745	0.0909091	1	0.166667		0.533333	0.963085	0.684753	0.0636364	1	0.119524	0.393939	0.978571
3	14	14	3	18	2	18	0	15	66	2	0	31	66	14	0	19	66	14	0	19	66	3	0	30	66	0.545455	1	0.705882	0.0606061	1	0.114286	0.424242	1	0.595745	0.424242	1	0.595745	0.0909091	1	0.166667		0.560606	0.960044	0.706596	0.0636364	1	0.119524	0.439394	0.981667
4	20	14	4	24	2	24	0	9	66	2	0	31	66	20	0	13	66	14	0	19	66	4	0	29	66	0.727273	1	0.842105	0.0606061	1	0.114286	0.606061	1	0.754717	0.424242	1	0.595745	0.121212	1	0.216216		0.681818	0.948875	0.791897	0.0636364	1	0.119524	0.560606	0.966211
5	21	14	6	25	2	25	0	8	66	2	0	31	66	21	0	12	66	14	0	19	66	6	0	27	66	0.757576	1	0.862069	0.0606061	1	0.114286	0.636364	1	0.777778	0.424242	1	0.595745	0.181818	1	0.307692		0.751515	0.940657	0.83515	0.0636364	1	0.119524	0.630303	0.96421
6	21	14	7	25	3	25	0	8	66	3	0	30	66	21	0	12	66	14	0	19	66	7	0	26	66	0.757576	1	0.862069	0.0909091	1	0.166667	0.636364	1	0.777778	0.424242	1	0.595745	0.212121	1	0.35		0.757576	0.940965	0.839124	0.0909091	1	0.166667	0.636364	0.959881
7	21	14	8	25	3	25	0	8	66	3	0	30	66	21	0	12	66	14	0	19	66	8	0	25	66	0.757576	1	0.862069	0.0909091	1	0.166667	0.636364	1	0.777778	0.424242	1	0.595745	0.242424	1	0.390244		0.769697	0.902771	0.82945	0.148485	1	0.250193	0.639394	0.956577
8	21	14	23	28	9	26	2	7	64	9	0	24	66	21	0	12	66	14	0	19	66	21	2	12	64	0.787879	0.928571	0.852459	0.272727	1	0.428571	0.636364	1	0.777778	0.424242	1	0.595745	0.636364	0.913043	0.75		0.787879	0.859513	0.820931	0.260606	0.99	0.409994	0.642424	0.952229
9	21	14	23	28	9	26	2	7	64	9	0	24	66	21	0	12	66	14	0	19	66	21	2	12	64	0.787879	0.928571	0.852459	0.272727	1	0.428571	0.636364	1	0.777778	0.424242	1	0.595745	0.636364	0.913043	0.75		0.790909	0.857674	0.821528	0.260606	0.99	0.409994	0.645455	0.948441
10	21	14	23	28	9	26	2	7	64	9	0	24	66	21	0	12	66	14	0	19	66	21	2	12	64	0.787879	0.928571	0.852459	0.272727	1	0.428571	0.636364	1	0.777778	0.424242	1	0.595745	0.636364	0.913043	0.75		0.793939	0.848953	0.819445	0.281818	0.99	0.438372	0.645455	0.948441
																										Union			Intersect			KEGG			GO			OMIM
n	KEGG	GO	OMIM	Union	Intersect	TP	FP	FN	TN	TP	FP	FN	TN	TP	FP	FN	TN	TP	FP	FN	TN	TP	FP	FN	TN	Sensitivity	Precision	F-score	Sensitivity	Precision	F-score	Sensitivity	Precision	F-score	Sensitivity	Precision	F-score	Sensitivity	Precision	F-score		Stdev (S)	Stdev (P)	Stdev (F)	Stdev (S)	Stdev (P)	Stdev (F)	Stdev (S)	Stdev (P)
1	7	13	3	17	2	17	0	16	66	2	0	31	66	7	0	26	66	13	0	20	66	3	0	30	66	0.515152	1	0.68	0.0606061	1	0.114286	0.212121	1	0.35	0.393939	1	0.565217	0.0909091	1	0.166667		0.042855	0.0294477	0.0380024	0.0255538	0	1.4836e-17	0.0127769	0.0663096
2	13	14	3	17	2	17	0	16	66	2	0	31	66	13	0	20	66	14	0	19	66	3	0	30	66	0.515152	1	0.68	0.0606061	1	0.114286	0.393939	1	0.565217	0.424242	1	0.595745	0.0909091	1	0.166667		0.057496	0.0358001	0.0438465	0.00958266	0	0.0165643	5.85139e-17	0.0345033
3	14	14	3	18	2	18	0	15	66	2	0	31	66	14	0	19	66	14	0	19	66	3	0	30	66	0.545455	1	0.705882	0.0606061	1	0.114286	0.424242	1	0.595745	0.424242	1	0.595745	0.0909091	1	0.166667		0.0479133	0.0395551	0.0368105	0.00958266	0	0.0165643	0.0479133	0.029866
4	16	14	4	20	2	19	1	14	65	2	0	31	66	15	1	18	65	14	0	19	66	4	0	29	66	0.575758	0.95	0.716981	0.0606061	1	0.114286	0.454545	0.9375	0.612245	0.424242	1	0.595745	0.121212	1	0.216216		0.0731888	0.0392356	0.0590787	0.00958266	0	0.0165643	0.0731888	0.0405132
5	22	14	6	26	2	25	1	8	65	2	0	31	66	21	1	12	65	14	0	19	66	6	0	27	66	0.757576	0.961538	0.847458	0.0606061	1	0.114286	0.636364	0.954545	0.763636	0.424242	1	0.595745	0.181818	1	0.307692		0.0127769	0.0339323	0.013462	0.00958266	0	0.0165643	0.0127769	0.0346087
6	22	14	7	26	3	25	1	8	65	3	0	30	66	21	1	12	65	14	0	19	66	7	0	26	66	0.757576	0.961538	0.847458	0.0909091	1	0.166667	0.636364	0.954545	0.763636	0.424242	1	0.595745	0.212121	1	0.35		1.17028e-16	0.0341328	0.0135876	1.46285e-17	0	2.92569e-17	1.17028e-16	0.0322464
7	22	14	23	30	9	26	4	7	62	9	0	24	66	21	1	12	65	14	0	19	66	20	3	13	63	0.787879	0.866667	0.825397	0.272727	1	0.428571	0.636364	0.954545	0.763636	0.424242	1	0.595745	0.606061	0.869565	0.714286		0.0156484	0.0645001	0.020781	0.0862439	0	0.124039	0.00958266	0.0386387
8	22	14	23	30	9	26	4	7	62	9	0	24	66	21	1	12	65	14	0	19	66	20	3	13	63	0.787879	0.866667	0.825397	0.272727	1	0.428571	0.636364	0.954545	0.763636	0.424242	1	0.595745	0.606061	0.869565	0.714286		0.014285	0.0583641	0.0231028	0.0498953	0.0316228	0.0691844	0.0127769	0.0355308
9	22	14	23	30	9	26	4	7	62	9	0	24	66	21	1	12	65	14	0	19	66	20	3	13	63	0.787879	0.866667	0.825397	0.272727	1	0.428571	0.636364	0.954545	0.763636	0.424242	1	0.595745	0.606061	0.869565	0.714286		0.0172014	0.0602678	0.0225728	0.0498953	0.0316228	0.0691844	0.0146378	0.0372347
10	22	14	23	30	9	26	4	7	62	9	0	24	66	21	1	12	65	14	0	19	66	20	3	13	63	0.787879	0.866667	0.825397	0.272727	1	0.428571	0.636364	0.954545	0.763636	0.424242	1	0.595745	0.606061	0.869565	0.714286		0.0127769	0.0554081	0.0223223	0.020453	0.0316228	0.0248917	0.0146378	0.0372347
																										Union			Intersect			KEGG			GO			OMIM				# Average of 10 repeats
n	KEGG	GO	OMIM	Union	Intersect	TP	FP	FN	TN	TP	FP	FN	TN	TP	FP	FN	TN	TP	FP	FN	TN	TP	FP	FN	TN	Sensitivity	Precision	F-score	Sensitivity	Precision	F-score	Sensitivity	Precision	F-score	Sensitivity	Precision	F-score	Sensitivity	Precision	F-score
1	7	14	3	15	0	14	1	19	65	0	0	33	66	6	1	27	65	13	1	20	65	3	0	30	66	0.424242	0.933333	0.583333	0	N/A	N/A	0.181818	0.857143	0.3	0.393939	0.928571	0.553191	0.0909091	1	0.166667
2	14	14	3	18	2	17	1	16	65	2	0	31	66	13	1	20	65	13	1	20	65	3	0	30	66	0.515152	0.944444	0.666667	0.0606061	1	0.114286	0.393939	0.928571	0.553191	0.393939	0.928571	0.553191	0.0909091	1	0.166667
3	15	15	3	19	2	18	1	15	65	2	0	31	66	14	1	19	65	14	1	19	65	3	0	30	66	0.545455	0.947368	0.692308	0.0606061	1	0.114286	0.424242	0.933333	0.583333	0.424242	0.933333	0.583333	0.0909091	1	0.166667
4	17	15	4	21	2	19	2	14	64	2	0	31	66	15	2	18	64	14	1	19	65	4	0	29	66	0.575758	0.904762	0.703704	0.0606061	1	0.114286	0.454545	0.882353	0.6	0.424242	0.933333	0.583333	0.121212	1	0.216216
5	23	16	6	28	2	25	3	8	63	2	0	31	66	21	2	12	64	14	2	19	64	6	0	27	66	0.757576	0.892857	0.819672	0.0606061	1	0.114286	0.636364	0.913043	0.75	0.424242	0.875	0.571429	0.181818	1	0.307692
6	23	16	7	28	3	25	3	8	63	3	0	30	66	21	2	12	64	14	2	19	64	7	0	26	66	0.757576	0.892857	0.819672	0.0909091	1	0.166667	0.636364	0.913043	0.75	0.424242	0.875	0.571429	0.212121	1	0.35
7	23	16	22	31	9	26	5	7	61	9	0	24	66	21	2	12	64	14	2	19	64	20	2	13	64	0.787879	0.83871	0.8125	0.272727	1	0.428571	0.636364	0.913043	0.75	0.424242	0.875	0.571429	0.606061	0.909091	0.727273
8	23	17	22	32	9	26	6	7	60	9	0	24	66	21	2	12	64	14	3	19	63	20	2	13	64	0.787879	0.8125	0.8	0.272727	1	0.428571	0.636364	0.913043	0.75	0.424242	0.823529	0.56	0.606061	0.909091	0.727273
9	23	17	22	32	9	26	6	7	60	9	0	24	66	21	2	12	64	14	3	19	63	20	2	13	64	0.787879	0.8125	0.8	0.272727	1	0.428571	0.636364	0.913043	0.75	0.424242	0.823529	0.56	0.606061	0.909091	0.727273
10	23	17	22	32	9	26	6	7	60	9	0	24	66	21	2	12	64	14	3	19	63	20	2	13	64	0.787879	0.8125	0.8	0.272727	1	0.428571	0.636364	0.913043	0.75	0.424242	0.823529	0.56	0.606061	0.909091	0.727273
																										Union			Intersect			KEGG			GO			OMIM
n	KEGG	GO	OMIM	Union	Intersect	TP	FP	FN	TN	TP	FP	FN	TN	TP	FP	FN	TN	TP	FP	FN	TN	TP	FP	FN	TN	Sensitivity	Precision	F-score	Sensitivity	Precision	F-score	Sensitivity	Precision	F-score	Sensitivity	Precision	F-score	Sensitivity	Precision	F-score
1	7	13	3	17	2	17	0	16	66	2	0	31	66	7	0	26	66	13	0	20	66	3	0	30	66	0.515152	1	0.68	0.0606061	1	0.114286	0.212121	1	0.35	0.393939	1	0.565217	0.0909091	1	0.166667
2	13	15	5	19	3	17	2	16	64	3	0	30	66	13	0	20	66	14	1	19	65	4	1	29	65	0.515152	0.894737	0.653846	0.0909091	1	0.166667	0.393939	1	0.565217	0.424242	0.933333	0.583333	0.121212	0.8	0.210526
3	14	15	5	20	3	18	2	15	64	3	0	30	66	14	0	19	66	14	1	19	65	4	1	29	65	0.545455	0.9	0.679245	0.0909091	1	0.166667	0.424242	1	0.595745	0.424242	0.933333	0.583333	0.121212	0.8	0.210526
4	20	15	5	26	3	24	2	9	64	3	0	30	66	20	0	13	66	14	1	19	65	4	1	29	65	0.727273	0.923077	0.813559	0.0909091	1	0.166667	0.606061	1	0.754717	0.424242	0.933333	0.583333	0.121212	0.8	0.210526
5	21	15	6	27	3	25	2	8	64	3	0	30	66	21	0	12	66	14	1	19	65	5	1	28	65	0.757576	0.925926	0.833333	0.0909091	1	0.166667	0.636364	1	0.777778	0.424242	0.933333	0.583333	0.151515	0.833333	0.25641
6	22	15	8	27	3	25	2	8	64	3	0	30	66	21	1	12	65	14	1	19	65	7	1	26	65	0.757576	0.925926	0.833333	0.0909091	1	0.166667	0.636364	0.954545	0.763636	0.424242	0.933333	0.583333	0.212121	0.875	0.341463
7	22	15	9	27	4	25	2	8	64	4	0	29	66	21	1	12	65	14	1	19	65	8	1	25	65	0.757576	0.925926	0.833333	0.121212	1	0.216216	0.636364	0.954545	0.763636	0.424242	0.933333	0.583333	0.242424	0.888889	0.380952
8	22	15	10	27	4	25	2	8	64	4	0	29	66	21	1	12	65	14	1	19	65	9	1	24	65	0.757576	0.925926	0.833333	0.121212	1	0.216216	0.636364	0.954545	0.763636	0.424242	0.933333	0.583333	0.272727	0.9	0.418605
9	22	15	10	27	4	25	2	8	64	4	0	29	66	21	1	12	65	14	1	19	65	9	1	24	65	0.757576	0.925926	0.833333	0.121212	1	0.216216	0.636364	0.954545	0.763636	0.424242	0.933333	0.583333	0.272727	0.9	0.418605
10	22	16	26	31	11	26	5	7	61	11	0	22	66	21	1	12	65	15	1	18	65	22	4	11	62	0.787879	0.83871	0.8125	0.333333	1	0.5	0.636364	0.954545	0.763636	0.454545	0.9375	0.612245	0.666667	0.846154	0.745763
																										Union			Intersect			KEGG			GO			OMIM
n	KEGG	GO	OMIM	Union	Intersect	TP	FP	FN	TN	TP	FP	FN	TN	TP	FP	FN	TN	TP	FP	FN	TN	TP	FP	FN	TN	Sensitivity	Precision	F-score	Sensitivity	Precision	F-score	Sensitivity	Precision	F-score	Sensitivity	Precision	F-score	Sensitivity	Precision	F-score
1	7	13	3	17	2	17	0	16	66	2	0	31	66	7	0	26	66	13	0	20	66	3	0	30	66	0.515152	1	0.68	0.0606061	1	0.114286	0.212121	1	0.35	0.393939	1	0.565217	0.0909091	1	0.166667
2	13	14	3	17	2	17	0	16	66	2	0	31	66	13	0	20	66	14	0	19	66	3	0	30	66	0.515152	1	0.68	0.0606061	1	0.114286	0.393939	1	0.565217	0.424242	1	0.595745	0.0909091	1	0.166667
3	14	14	3	18	2	18	0	15	66	2	0	31	66	14	0	19	66	14	0	19	66	3	0	30	66	0.545455	1	0.705882	0.0606061	1	0.114286	0.424242	1	0.595745	0.424242	1	0.595745	0.0909091	1	0.166667
4	20	14	4	24	2	24	0	9	66	2	0	31	66	20	0	13	66	14	0	19	66	4	0	29	66	0.727273	1	0.842105	0.0606061	1	0.114286	0.606061	1	0.754717	0.424242	1	0.595745	0.121212	1	0.216216
5	21	14	6	25	2	24	1	9	65	2	0	31	66	20	1	13	65	14	0	19	66	6	0	27	66	0.727273	0.96	0.827586	0.0606061	1	0.114286	0.606061	0.952381	0.740741	0.424242	1	0.595745	0.181818	1	0.307692
6	22	14	7	26	3	25	1	8	65	3	0	30	66	21	1	12	65	14	0	19	66	7	0	26	66	0.757576	0.961538	0.847458	0.0909091	1	0.166667	0.636364	0.954545	0.763636	0.424242	1	0.595745	0.212121	1	0.35
7	22	14	26	33	9	26	7	7	59	9	0	24	66	21	1	12	65	14	0	19	66	20	6	13	60	0.787879	0.787879	0.787879	0.272727	1	0.428571	0.636364	0.954545	0.763636	0.424242	1	0.595745	0.606061	0.769231	0.677966
8	22	14	26	33	9	26	7	7	59	9	0	24	66	21	1	12	65	14	0	19	66	20	6	13	60	0.787879	0.787879	0.787879	0.272727	1	0.428571	0.636364	0.954545	0.763636	0.424242	1	0.595745	0.606061	0.769231	0.677966
9	22	14	26	33	9	26	7	7	59	9	0	24	66	21	1	12	65	14	0	19	66	20	6	13	60	0.787879	0.787879	0.787879	0.272727	1	0.428571	0.636364	0.954545	0.763636	0.424242	1	0.595745	0.606061	0.769231	0.677966
10	22	14	26	33	9	26	7	7	59	9	0	24	66	21	1	12	65	14	0	19	66	20	6	13	60	0.787879	0.787879	0.787879	0.272727	1	0.428571	0.636364	0.954545	0.763636	0.424242	1	0.595745	0.606061	0.769231	0.677966
																										Union			Intersect			KEGG			GO			OMIM
n	KEGG	GO	OMIM	Union	Intersect	TP	FP	FN	TN	TP	FP	FN	TN	TP	FP	FN	TN	TP	FP	FN	TN	TP	FP	FN	TN	Sensitivity	Precision	F-score	Sensitivity	Precision	F-score	Sensitivity	Precision	F-score	Sensitivity	Precision	F-score	Sensitivity	Precision	F-score
1	7	13	3	17	2	17	0	16	66	2	0	31	66	7	0	26	66	13	0	20	66	3	0	30	66	0.515152	1	0.68	0.0606061	1	0.114286	0.212121	1	0.35	0.393939	1	0.565217	0.0909091	1	0.166667
2	13	14	3	17	2	17	0	16	66	2	0	31	66	13	0	20	66	14	0	19	66	3	0	30	66	0.515152	1	0.68	0.0606061	1	0.114286	0.393939	1	0.565217	0.424242	1	0.595745	0.0909091	1	0.166667
3	14	14	3	18	2	18	0	15	66	2	0	31	66	14	0	19	66	14	0	19	66	3	0	30	66	0.545455	1	0.705882	0.0606061	1	0.114286	0.424242	1	0.595745	0.424242	1	0.595745	0.0909091	1	0.166667
4	20	14	4	24	2	24	0	9	66	2	0	31	66	20	0	13	66	14	0	19	66	4	0	29	66	0.727273	1	0.842105	0.0606061	1	0.114286	0.606061	1	0.754717	0.424242	1	0.595745	0.121212	1	0.216216
5	21	15	6	26	2	25	1	8	65	2	0	31	66	21	0	12	66	14	1	19	65	6	0	27	66	0.757576	0.961538	0.847458	0.0606061	1	0.114286	0.636364	1	0.777778	0.424242	0.933333	0.583333	0.181818	1	0.307692
6	21	15	7	26	3	25	1	8	65	3	0	30	66	21	0	12	66	14	1	19	65	7	0	26	66	0.757576	0.961538	0.847458	0.0909091	1	0.166667	0.636364	1	0.777778	0.424242	0.933333	0.583333	0.212121	1	0.35
7	21	15	8	26	3	25	1	8	65	3	0	30	66	21	0	12	66	14	1	19	65	8	0	25	66	0.757576	0.961538	0.847458	0.0909091	1	0.166667	0.636364	1	0.777778	0.424242	0.933333	0.583333	0.242424	1	0.390244
8	21	15	23	29	9	26	3	7	63	9	0	24	66	21	0	12	66	14	1	19	65	21	2	12	64	0.787879	0.896552	0.83871	0.272727	1	0.428571	0.636364	1	0.777778	0.424242	0.933333	0.583333	0.636364	0.913043	0.75
9	21	15	23	29	9	26	3	7	63	9	0	24	66	21	0	12	66	14	1	19	65	21	2	12	64	0.787879	0.896552	0.83871	0.272727	1	0.428571	0.636364	1	0.777778	0.424242	0.933333	0.583333	0.636364	0.913043	0.75
10	21	15	23	29	9	26	3	7	63	9	0	24	66	21	0	12	66	14	1	19	65	21	2	12	64	0.787879	0.896552	0.83871	0.272727	1	0.428571	0.636364	1	0.777778	0.424242	0.933333	0.583333	0.636364	0.913043	0.75
																										Union			Intersect			KEGG			GO			OMIM
n	KEGG	GO	OMIM	Union	Intersect	TP	FP	FN	TN	TP	FP	FN	TN	TP	FP	FN	TN	TP	FP	FN	TN	TP	FP	FN	TN	Sensitivity	Precision	F-score	Sensitivity	Precision	F-score	Sensitivity	Precision	F-score	Sensitivity	Precision	F-score	Sensitivity	Precision	F-score
1	7	13	3	17	2	17	0	16	66	2	0	31	66	7	0	26	66	13	0	20	66	3	0	30	66	0.515152	1	0.68	0.0606061	1	0.114286	0.212121	1	0.35	0.393939	1	0.565217	0.0909091	1	0.166667
2	13	15	3	18	2	17	1	16	65	2	0	31	66	13	0	20	66	14	1	19	65	3	0	30	66	0.515152	0.944444	0.666667	0.0606061	1	0.114286	0.393939	1	0.565217	0.424242	0.933333	0.583333	0.0909091	1	0.166667
3	14	15	3	19	2	18	1	15	65	2	0	31	66	14	0	19	66	14	1	19	65	3	0	30	66	0.545455	0.947368	0.692308	0.0606061	1	0.114286	0.424242	1	0.595745	0.424242	0.933333	0.583333	0.0909091	1	0.166667
4	16	16	4	21	2	19	2	14	64	2	0	31	66	15	1	18	65	14	2	19	64	4	0	29	66	0.575758	0.904762	0.703704	0.0606061	1	0.114286	0.454545	0.9375	0.612245	0.424242	0.875	0.571429	0.121212	1	0.216216
5	22	16	6	27	2	25	2	8	64	2	0	31	66	21	1	12	65	14	2	19	64	6	0	27	66	0.757576	0.925926	0.833333	0.0606061	1	0.114286	0.636364	0.954545	0.763636	0.424242	0.875	0.571429	0.181818	1	0.307692
6	22	16	7	27	3	25	2	8	64	3	0	30	66	21	1	12	65	14	2	19	64	7	0	26	66	0.757576	0.925926	0.833333	0.0909091	1	0.166667	0.636364	0.954545	0.763636	0.424242	0.875	0.571429	0.212121	1	0.35
7	22	16	8	27	3	25	2	8	64	3	0	30	66	21	1	12	65	14	2	19	64	8	0	25	66	0.757576	0.925926	0.833333	0.0909091	1	0.166667	0.636364	0.954545	0.763636	0.424242	0.875	0.571429	0.242424	1	0.390244
8	22	16	22	29	9	26	3	7	63	9	0	24	66	21	1	12	65	14	2	19	64	21	1	12	65	0.787879	0.896552	0.83871	0.272727	1	0.428571	0.636364	0.954545	0.763636	0.424242	0.875	0.571429	0.636364	0.954545	0.763636
9	22	16	22	29	9	26	3	7	63	9	0	24	66	21	1	12	65	14	2	19	64	21	1	12	65	0.787879	0.896552	0.83871	0.272727	1	0.428571	0.636364	0.954545	0.763636	0.424242	0.875	0.571429	0.636364	0.954545	0.763636
10	22	16	22	29	9	26	3	7	63	9	0	24	66	21	1	12	65	14	2	19	64	21	1	12	65	0.787879	0.896552	0.83871	0.272727	1	0.428571	0.636364	0.954545	0.763636	0.424242	0.875	0.571429	0.636364	0.954545	0.763636
																										Union			Intersect			KEGG			GO			OMIM
n	KEGG	GO	OMIM	Union	Intersect	TP	FP	FN	TN	TP	FP	FN	TN	TP	FP	FN	TN	TP	FP	FN	TN	TP	FP	FN	TN	Sensitivity	Precision	F-score	Sensitivity	Precision	F-score	Sensitivity	Precision	F-score	Sensitivity	Precision	F-score	Sensitivity	Precision	F-score
1	7	14	3	18	2	17	1	16	65	2	0	31	66	7	0	26	66	13	1	20	65	3	0	30	66	0.515152	0.944444	0.666667	0.0606061	1	0.114286	0.212121	1	0.35	0.393939	0.928571	0.553191	0.0909091	1	0.166667
2	13	15	3	18	2	17	1	16	65	2	0	31	66	13	0	20	66	14	1	19	65	3	0	30	66	0.515152	0.944444	0.666667	0.0606061	1	0.114286	0.393939	1	0.565217	0.424242	0.933333	0.583333	0.0909091	1	0.166667
3	14	15	3	19	2	18	1	15	65	2	0	31	66	14	0	19	66	14	1	19	65	3	0	30	66	0.545455	0.947368	0.692308	0.0606061	1	0.114286	0.424242	1	0.595745	0.424242	0.933333	0.583333	0.0909091	1	0.166667
4	20	15	4	25	2	24	1	9	65	2	0	31	66	20	0	13	66	14	1	19	65	4	0	29	66	0.727273	0.96	0.827586	0.0606061	1	0.114286	0.606061	1	0.754717	0.424242	0.933333	0.583333	0.121212	1	0.216216
5	20	15	6	25	2	24	1	9	65	2	0	31	66	20	0	13	66	14	1	19	65	6	0	27	66	0.727273	0.96	0.827586	0.0606061	1	0.114286	0.606061	1	0.754717	0.424242	0.933333	0.583333	0.181818	1	0.307692
6	21	15	7	26	3	25	1	8	65	3	0	30	66	21	0	12	66	14	1	19	65	7	0	26	66	0.757576	0.961538	0.847458	0.0909091	1	0.166667	0.636364	1	0.777778	0.424242	0.933333	0.583333	0.212121	1	0.35
7	21	15	8	26	3	25	1	8	65	3	0	30	66	21	0	12	66	14	1	19	65	8	0	25	66	0.757576	0.961538	0.847458	0.0909091	1	0.166667	0.636364	1	0.777778	0.424242	0.933333	0.583333	0.242424	1	0.390244
8	23	17	21	29	10	26	3	7	63	10	0	23	66	22	1	11	65	15	2	18	64	21	0	12	66	0.787879	0.896552	0.83871	0.30303	1	0.465116	0.666667	0.956522	0.785714	0.454545	0.882353	0.6	0.636364	1	0.777778
9	23	17	21	29	10	26	3	7	63	10	0	23	66	22	1	11	65	15	2	18	64	21	0	12	66	0.787879	0.896552	0.83871	0.30303	1	0.465116	0.666667	0.956522	0.785714	0.454545	0.882353	0.6	0.636364	1	0.777778
10	23	17	21	29	10	26	3	7	63	10	0	23	66	22	1	11	65	15	2	18	64	21	0	12	66	0.787879	0.896552	0.83871	0.30303	1	0.465116	0.666667	0.956522	0.785714	0.454545	0.882353	0.6	0.636364	1	0.777778
																										Union			Intersect			KEGG			GO			OMIM
n	KEGG	GO	OMIM	Union	Intersect	TP	FP	FN	TN	TP	FP	FN	TN	TP	FP	FN	TN	TP	FP	FN	TN	TP	FP	FN	TN	Sensitivity	Precision	F-score	Sensitivity	Precision	F-score	Sensitivity	Precision	F-score	Sensitivity	Precision	F-score	Sensitivity	Precision	F-score
1	7	13	3	21	0	20	1	13	65	0	0	33	66	6	1	27	65	13	0	20	66	3	0	30	66	0.606061	0.952381	0.740741	0	N/A	N/A	0.181818	0.857143	0.3	0.393939	1	0.565217	0.0909091	1	0.166667
2	14	14	3	24	2	23	1	10	65	2	0	31	66	13	1	20	65	14	0	19	66	3	0	30	66	0.69697	0.958333	0.807018	0.0606061	1	0.114286	0.393939	0.928571	0.553191	0.424242	1	0.595745	0.0909091	1	0.166667
3	20	14	3	24	2	23	1	10	65	2	0	31	66	19	1	14	65	14	0	19	66	3	0	30	66	0.69697	0.958333	0.807018	0.0606061	1	0.114286	0.575758	0.95	0.716981	0.424242	1	0.595745	0.0909091	1	0.166667
4	21	15	4	26	2	24	2	9	64	2	0	31	66	20	1	13	65	14	1	19	65	4	0	29	66	0.727273	0.923077	0.813559	0.0606061	1	0.114286	0.606061	0.952381	0.740741	0.424242	0.933333	0.583333	0.121212	1	0.216216
5	23	15	6	28	2	25	3	8	63	2	0	31	66	21	2	12	64	14	1	19	65	6	0	27	66	0.757576	0.892857	0.819672	0.0606061	1	0.114286	0.636364	0.913043	0.75	0.424242	0.933333	0.583333	0.181818	1	0.307692
6	23	15	7	28	3	25	3	8	63	3	0	30	66	21	2	12	64	14	1	19	65	7	0	26	66	0.757576	0.892857	0.819672	0.0909091	1	0.166667	0.636364	0.913043	0.75	0.424242	0.933333	0.583333	0.212121	1	0.35
7	25	15	7	30	3	26	4	7	62	3	0	30	66	22	3	11	63	14	1	19	65	7	0	26	66	0.787879	0.866667	0.825397	0.0909091	1	0.166667	0.666667	0.88	0.758621	0.424242	0.933333	0.583333	0.212121	1	0.35
8	25	15	24	35	9	27	8	6	58	9	0	24	66	22	3	11	63	14	1	19	65	20	4	13	62	0.818182	0.771429	0.794118	0.272727	1	0.428571	0.666667	0.88	0.758621	0.424242	0.933333	0.583333	0.606061	0.833333	0.701754
9	25	15	24	35	9	27	8	6	58	9	0	24	66	22	3	11	63	14	1	19	65	20	4	13	62	0.818182	0.771429	0.794118	0.272727	1	0.428571	0.666667	0.88	0.758621	0.424242	0.933333	0.583333	0.606061	0.833333	0.701754
10	25	15	24	35	9	27	8	6	58	9	0	24	66	22	3	11	63	14	1	19	65	20	4	13	62	0.818182	0.771429	0.794118	0.272727	1	0.428571	0.666667	0.88	0.758621	0.424242	0.933333	0.583333	0.606061	0.833333	0.701754
																										Union			Intersect			KEGG			GO			OMIM
n	KEGG	GO	OMIM	Union	Intersect	TP	FP	FN	TN	TP	FP	FN	TN	TP	FP	FN	TN	TP	FP	FN	TN	TP	FP	FN	TN	Sensitivity	Precision	F-score	Sensitivity	Precision	F-score	Sensitivity	Precision	F-score	Sensitivity	Precision	F-score	Sensitivity	Precision	F-score
1	8	13	3	18	2	17	1	16	65	2	0	31	66	7	1	26	65	13	0	20	66	3	0	30	66	0.515152	0.944444	0.666667	0.0606061	1	0.114286	0.212121	0.875	0.341463	0.393939	1	0.565217	0.0909091	1	0.166667
2	14	14	3	18	2	17	1	16	65	2	0	31	66	13	1	20	65	14	0	19	66	3	0	30	66	0.515152	0.944444	0.666667	0.0606061	1	0.114286	0.393939	0.928571	0.553191	0.424242	1	0.595745	0.0909091	1	0.166667
3	15	16	3	20	2	18	2	15	64	2	0	31	66	14	1	19	65	14	2	19	64	3	0	30	66	0.545455	0.9	0.679245	0.0606061	1	0.114286	0.424242	0.933333	0.583333	0.424242	0.875	0.571429	0.0909091	1	0.166667
4	21	16	4	26	2	24	2	9	64	2	0	31	66	20	1	13	65	14	2	19	64	4	0	29	66	0.727273	0.923077	0.813559	0.0606061	1	0.114286	0.606061	0.952381	0.740741	0.424242	0.875	0.571429	0.121212	1	0.216216
5	22	16	6	27	2	25	2	8	64	2	0	31	66	21	1	12	65	14	2	19	64	6	0	27	66	0.757576	0.925926	0.833333	0.0606061	1	0.114286	0.636364	0.954545	0.763636	0.424242	0.875	0.571429	0.181818	1	0.307692
6	22	16	7	27	3	25	2	8	64	3	0	30	66	21	1	12	65	14	2	19	64	7	0	26	66	0.757576	0.925926	0.833333	0.0909091	1	0.166667	0.636364	0.954545	0.763636	0.424242	0.875	0.571429	0.212121	1	0.35
7	22	17	7	28	3	25	3	8	63	3	0	30	66	21	1	12	65	14	3	19	63	7	0	26	66	0.757576	0.892857	0.819672	0.0909091	1	0.166667	0.636364	0.954545	0.763636	0.424242	0.823529	0.56	0.212121	1	0.35
8	22	17	24	32	10	26	6	7	60	9	1	24	65	21	1	12	65	14	3	19	63	20	4	13	62	0.787879	0.8125	0.8	0.272727	0.9	0.418605	0.636364	0.954545	0.763636	0.424242	0.823529	0.56	0.606061	0.833333	0.701754
9	24	17	24	34	10	27	7	6	59	9	1	24	65	22	2	11	64	14	3	19	63	20	4	13	62	0.818182	0.794118	0.80597	0.272727	0.9	0.418605	0.666667	0.916667	0.77193	0.424242	0.823529	0.56	0.606061	0.833333	0.701754
10	24	17	24	34	10	27	7	6	59	9	1	24	65	22	2	11	64	14	3	19	63	20	4	13	62	0.818182	0.794118	0.80597	0.272727	0.9	0.418605	0.666667	0.916667	0.77193	0.424242	0.823529	0.56	0.606061	0.833333	0.701754
[truncated: 7 more columns]

## Sheet: endo
Test1						Union				Intersect				KEGG				GO				OMIM				Union			Intersect			KEGG			GO			OMIM				Union			Intersect			KEGG
n	KEGG	GO	OMIM	Union	Intersect	TP	FP	FN	TN	TP	FP	FN	TN	TP	FP	FN	TN	TP	FP	FN	TN	TP	FP	FN	TN	Sensitivity	Precision	F-score	Sensitivity	Precision	F-score	Sensitivity	Precision	F-score	Sensitivity	Precision	F-score	Sensitivity	Precision	F-score		Sensitivity (S)	Precision (P)	F-score (F)	Sensitivity (S)	Precision (P)	F-score (F)	Sensitivity (S)	Precision (P)
1	12	8	4	17	0	17	0	26	86	0	0	43	86	12	0	31	86	8	0	35	86	4	0	39	86	0.395349	1	0.566667	0	N/A	N/A	0.27907	1	0.436364	0.186047	1	0.313725	0.0930233	1	0.170213		0.374419	0.973333	0.538295	0.00232558	1	0.0454545	0.27907	1
2	13	14	4	23	0	22	1	21	85	0	0	43	86	13	0	30	86	13	1	30	85	4	0	39	86	0.511628	0.956522	0.666667	0	N/A	N/A	0.302326	1	0.464286	0.302326	0.928571	0.45614	0.0930233	1	0.170213		0.434884	0.957754	0.596353	0.00930233	1	0.0879447	0.302326	1
3	13	14	4	23	0	22	1	21	85	0	0	43	86	13	0	30	86	13	1	30	85	4	0	39	86	0.511628	0.956522	0.666667	0	N/A	N/A	0.302326	1	0.464286	0.302326	0.928571	0.45614	0.0930233	1	0.170213		0.444186	0.954684	0.60396	0.0162791	1	0.102108	0.302326	0.992857
4	14	16	6	25	1	24	1	19	85	1	0	42	86	14	0	29	86	15	1	28	85	6	0	37	86	0.55814	0.96	0.705882	0.0232558	1	0.0454545	0.325581	1	0.491228	0.348837	0.9375	0.508475	0.139535	1	0.244898		0.532558	0.932289	0.676319	0.0511628	1	0.0953578	0.325581	0.993333
5	16	16	9	27	2	25	2	18	84	2	0	41	86	14	2	29	84	15	1	28	85	9	0	34	86	0.581395	0.925926	0.714286	0.0465116	1	0.0888889	0.325581	0.875	0.474576	0.348837	0.9375	0.508475	0.209302	1	0.346154		0.574419	0.917533	0.705693	0.0813953	1	0.148611	0.325581	0.980833
6	16	23	9	27	5	25	2	18	84	5	0	38	86	14	2	29	84	21	2	22	84	9	0	34	86	0.581395	0.925926	0.714286	0.116279	1	0.208333	0.325581	0.875	0.474576	0.488372	0.913043	0.636364	0.209302	1	0.346154		0.581395	0.912234	0.709343	0.116279	1	0.206383	0.34186	0.975
7	16	23	10	27	6	25	2	18	84	6	0	37	86	14	2	29	84	21	2	22	84	10	0	33	86	0.581395	0.925926	0.714286	0.139535	1	0.244898	0.325581	0.875	0.474576	0.488372	0.913043	0.636364	0.232558	1	0.377358		0.62093	0.896925	0.728856	0.146512	1	0.251498	0.346512	0.975
8	17	23	26	38	10	31	7	12	79	10	0	33	86	15	2	28	84	21	2	22	84	21	5	22	81	0.72093	0.815789	0.765432	0.232558	1	0.377358	0.348837	0.882353	0.5	0.488372	0.913043	0.636364	0.488372	0.807692	0.608696		0.751163	0.815864	0.779891	0.202326	1	0.333179	0.362791	0.95244
9	17	24	26	39	10	32	7	11	79	10	0	33	86	15	2	28	84	22	2	21	84	21	5	22	81	0.744186	0.820513	0.780488	0.232558	1	0.377358	0.348837	0.882353	0.5	0.511628	0.916667	0.656716	0.488372	0.807692	0.608696		0.772093	0.813494	0.790822	0.213953	1	0.350489	0.409302	0.935805
10	18	24	26	39	10	32	7	11	79	10	0	33	86	16	2	27	84	22	2	21	84	21	5	22	81	0.744186	0.820513	0.780488	0.232558	1	0.377358	0.372093	0.888889	0.52459	0.511628	0.916667	0.656716	0.488372	0.807692	0.608696		0.772093	0.813494	0.790822	0.227907	1	0.368918	0.411628	0.936459
																										Union			Intersect			KEGG			GO			OMIM
n	KEGG	GO	OMIM	Union	Intersect	TP	FP	FN	TN	TP	FP	FN	TN	TP	FP	FN	TN	TP	FP	FN	TN	TP	FP	FN	TN	Sensitivity	Precision	F-score	Sensitivity	Precision	F-score	Sensitivity	Precision	F-score	Sensitivity	Precision	F-score	Sensitivity	Precision	F-score		Stdev (S)	Stdev (P)	Stdev (F)	Stdev (S)	Stdev (P)	Stdev (F)	Stdev (S)	Stdev (P)
1	12	8	4	17	0	17	0	26	86	0	0	43	86	12	0	31	86	8	0	35	86	4	0	39	86	0.395349	1	0.566667	0	N/A	N/A	0.27907	1	0.436364	0.186047	1	0.313725	0.0930233	1	0.170213		0.0507737	0.0367395	0.0539444	0.00735413			0	0
2	13	10	4	18	0	18	0	25	86	0	0	43	86	13	0	30	86	10	0	33	86	4	0	39	86	0.418605	1	0.590164	0	N/A	N/A	0.302326	1	0.464286	0.232558	1	0.377358	0.0930233	1	0.170213		0.0425298	0.0427608	0.0348968	0.0224673	0	0.0600901	5.85139e-17	0
3	13	10	4	18	0	18	0	25	86	0	0	43	86	13	0	30	86	10	0	33	86	4	0	39	86	0.418605	1	0.590164	0	N/A	N/A	0.302326	1	0.464286	0.232558	1	0.377358	0.0930233	1	0.170213		0.0483487	0.0446498	0.0391271	0.0291085	0	0.0490634	5.85139e-17	0.0225877
4	14	10	6	20	1	20	0	23	86	1	0	42	86	14	0	29	86	10	0	33	86	6	0	37	86	0.465116	1	0.634921	0.0232558	1	0.0454545	0.325581	1	0.491228	0.232558	1	0.377358	0.139535	1	0.244898		0.0495761	0.0318587	0.0402072	0.0360278	0	0.0644249	5.85139e-17	0.0210819
5	14	15	9	25	2	25	0	18	86	2	0	41	86	14	0	29	86	15	0	28	86	9	0	34	86	0.581395	1	0.735294	0.0465116	1	0.0888889	0.325581	1	0.491228	0.348837	1	0.517241	0.209302	1	0.346154		0.0329799	0.0581603	0.0354784	0.0367707	0	0.0629527	5.85139e-17	0.0426821
6	15	15	9	25	2	25	0	18	86	2	0	41	86	15	0	28	86	15	0	28	86	9	0	34	86	0.581395	1	0.735294	0.0465116	1	0.0888889	0.348837	1	0.517241	0.348837	1	0.517241	0.209302	1	0.346154		0.0290051	0.0602879	0.0323122	0.0379766	0	0.0636987	0.0112336	0.0437004
7	15	15	10	25	2	25	0	18	86	2	0	41	86	15	0	28	86	15	0	28	86	10	0	33	86	0.581395	1	0.735294	0.0465116	1	0.0888889	0.348837	1	0.517241	0.348837	1	0.517241	0.232558	1	0.377358		0.07109	0.0672828	0.0344415	0.0570176	0	0.0912313	0.00735413	0.0437004
8	22	15	25	36	6	31	5	12	81	6	0	37	86	21	1	22	85	15	0	28	86	21	4	22	82	0.72093	0.861111	0.78481	0.139535	1	0.244898	0.488372	0.954545	0.646154	0.348837	1	0.517241	0.488372	0.84	0.617647		0.0490888	0.0443608	0.0180203	0.0548693	0	0.0822911	0.0441248	0.0377396
9	28	15	25	38	7	32	6	11	80	7	0	36	86	26	2	17	84	15	0	28	86	21	4	22	82	0.744186	0.842105	0.790123	0.162791	1	0.28	0.604651	0.928571	0.732394	0.348837	1	0.517241	0.488372	0.84	0.617647		0.0285877	0.0468959	0.0147879	0.0435766	0	0.0619873	0.0878401	0.0474615
10	28	21	25	38	13	32	6	11	80	13	0	30	86	26	2	17	84	21	0	22	86	21	4	22	82	0.744186	0.842105	0.790123	0.302326	1	0.464286	0.604651	0.928571	0.732394	0.488372	1	0.65625	0.488372	0.84	0.617647		0.0285877	0.0468959	0.0147879	0.047534	0	0.0659686	0.0863567	0.0466822
																										Union			Intersect			KEGG			GO			OMIM				# Average of 10 repeats
n	KEGG	GO	OMIM	Union	Intersect	TP	FP	FN	TN	TP	FP	FN	TN	TP	FP	FN	TN	TP	FP	FN	TN	TP	FP	FN	TN	Sensitivity	Precision	F-score	Sensitivity	Precision	F-score	Sensitivity	Precision	F-score	Sensitivity	Precision	F-score	Sensitivity	Precision	F-score
1	12	8	4	17	0	17	0	26	86	0	0	43	86	12	0	31	86	8	0	35	86	4	0	39	86	0.395349	1	0.566667	0	N/A	N/A	0.27907	1	0.436364	0.186047	1	0.313725	0.0930233	1	0.170213
2	13	10	4	18	0	18	0	25	86	0	0	43	86	13	0	30	86	10	0	33	86	4	0	39	86	0.418605	1	0.590164	0	N/A	N/A	0.302326	1	0.464286	0.232558	1	0.377358	0.0930233	1	0.170213
3	13	10	4	18	0	18	0	25	86	0	0	43	86	13	0	30	86	10	0	33	86	4	0	39	86	0.418605	1	0.590164	0	N/A	N/A	0.302326	1	0.464286	0.232558	1	0.377358	0.0930233	1	0.170213
4	14	23	6	27	4	25	2	18	84	4	0	39	86	14	0	29	86	21	2	22	84	6	0	37	86	0.581395	0.925926	0.714286	0.0930233	1	0.170213	0.325581	1	0.491228	0.488372	0.913043	0.636364	0.139535	1	0.244898
5	14	23	9	27	5	25	2	18	84	5	0	38	86	14	0	29	86	21	2	22	84	9	0	34	86	0.581395	0.925926	0.714286	0.116279	1	0.208333	0.325581	1	0.491228	0.488372	0.913043	0.636364	0.209302	1	0.346154
6	16	26	9	30	6	26	4	17	82	6	0	37	86	15	1	28	85	22	4	21	82	9	0	34	86	0.604651	0.866667	0.712329	0.139535	1	0.244898	0.348837	0.9375	0.508475	0.511628	0.846154	0.637681	0.209302	1	0.346154
7	16	26	10	30	7	26	4	17	82	7	0	36	86	15	1	28	85	22	4	21	82	10	0	33	86	0.604651	0.866667	0.712329	0.162791	1	0.28	0.348837	0.9375	0.508475	0.511628	0.846154	0.637681	0.232558	1	0.377358
8	16	33	27	47	10	35	12	8	74	10	0	33	86	15	1	28	85	26	7	17	79	21	6	22	80	0.813953	0.744681	0.777778	0.232558	1	0.377358	0.348837	0.9375	0.508475	0.604651	0.787879	0.684211	0.488372	0.777778	0.6
9	17	35	27	48	10	35	13	8	73	10	0	33	86	15	2	28	84	27	8	16	78	21	6	22	80	0.813953	0.729167	0.769231	0.232558	1	0.377358	0.348837	0.882353	0.5	0.627907	0.771429	0.692308	0.488372	0.777778	0.6
10	17	35	27	48	10	35	13	8	73	10	0	33	86	15	2	28	84	27	8	16	78	21	6	22	80	0.813953	0.729167	0.769231	0.232558	1	0.377358	0.348837	0.882353	0.5	0.627907	0.771429	0.692308	0.488372	0.777778	0.6
																										Union			Intersect			KEGG			GO			OMIM
n	KEGG	GO	OMIM	Union	Intersect	TP	FP	FN	TN	TP	FP	FN	TN	TP	FP	FN	TN	TP	FP	FN	TN	TP	FP	FN	TN	Sensitivity	Precision	F-score	Sensitivity	Precision	F-score	Sensitivity	Precision	F-score	Sensitivity	Precision	F-score	Sensitivity	Precision	F-score
1	12	9	3	20	1	18	2	25	84	1	0	42	86	12	0	31	86	8	1	35	85	2	1	41	85	0.418605	0.9	0.571429	0.0232558	1	0.0454545	0.27907	1	0.436364	0.186047	0.888889	0.307692	0.0465116	0.666667	0.0869565
2	13	9	7	21	1	19	2	24	84	1	0	42	86	13	0	30	86	8	1	35	85	6	1	37	85	0.44186	0.904762	0.59375	0.0232558	1	0.0454545	0.302326	1	0.464286	0.186047	0.888889	0.307692	0.139535	0.857143	0.24
3	13	11	7	21	1	19	2	24	84	1	0	42	86	13	0	30	86	10	1	33	85	6	1	37	85	0.44186	0.904762	0.59375	0.0232558	1	0.0454545	0.302326	1	0.464286	0.232558	0.909091	0.37037	0.139535	0.857143	0.24
4	14	11	7	22	1	20	2	23	84	1	0	42	86	14	0	29	86	10	1	33	85	6	1	37	85	0.465116	0.909091	0.615385	0.0232558	1	0.0454545	0.325581	1	0.491228	0.232558	0.909091	0.37037	0.139535	0.857143	0.24
5	14	11	9	23	2	21	2	22	84	2	0	41	86	14	0	29	86	10	1	33	85	8	1	35	85	0.488372	0.913043	0.636364	0.0465116	1	0.0888889	0.325581	1	0.491228	0.232558	0.909091	0.37037	0.186047	0.888889	0.307692
6	14	11	10	24	2	22	2	21	84	2	0	41	86	14	0	29	86	10	1	33	85	9	1	34	85	0.511628	0.916667	0.656716	0.0465116	1	0.0888889	0.325581	1	0.491228	0.232558	0.909091	0.37037	0.209302	0.9	0.339623
7	15	11	11	24	2	22	2	21	84	2	0	41	86	15	0	28	86	10	1	33	85	10	1	33	85	0.511628	0.916667	0.656716	0.0465116	1	0.0888889	0.348837	1	0.517241	0.232558	0.909091	0.37037	0.232558	0.909091	0.37037
8	16	11	23	32	3	28	4	15	82	3	0	40	86	15	1	28	85	10	1	33	85	21	2	22	84	0.651163	0.875	0.746667	0.0697674	1	0.130435	0.348837	0.9375	0.508475	0.232558	0.909091	0.37037	0.488372	0.913043	0.636364
9	22	16	23	36	5	32	4	11	82	5	0	38	86	20	2	23	84	15	1	28	85	21	2	22	84	0.744186	0.888889	0.810127	0.116279	1	0.208333	0.465116	0.909091	0.615385	0.348837	0.9375	0.508475	0.488372	0.913043	0.636364
10	22	16	23	36	5	32	4	11	82	5	0	38	86	20	2	23	84	15	1	28	85	21	2	22	84	0.744186	0.888889	0.810127	0.116279	1	0.208333	0.465116	0.909091	0.615385	0.348837	0.9375	0.508475	0.488372	0.913043	0.636364
																										Union			Intersect			KEGG			GO			OMIM
n	KEGG	GO	OMIM	Union	Intersect	TP	FP	FN	TN	TP	FP	FN	TN	TP	FP	FN	TN	TP	FP	FN	TN	TP	FP	FN	TN	Sensitivity	Precision	F-score	Sensitivity	Precision	F-score	Sensitivity	Precision	F-score	Sensitivity	Precision	F-score	Sensitivity	Precision	F-score
1	12	9	4	18	0	17	1	26	85	0	0	43	86	12	0	31	86	8	1	35	85	4	0	39	86	0.395349	0.944444	0.557377	0	N/A	N/A	0.27907	1	0.436364	0.186047	0.888889	0.307692	0.0930233	1	0.170213
2	13	20	4	25	3	22	3	21	83	3	0	40	86	13	0	30	86	17	3	26	83	4	0	39	86	0.511628	0.88	0.647059	0.0697674	1	0.130435	0.302326	1	0.464286	0.395349	0.85	0.539683	0.0930233	1	0.170213
3	13	22	4	25	3	22	3	21	83	3	0	40	86	13	0	30	86	19	3	24	83	4	0	39	86	0.511628	0.88	0.647059	0.0697674	1	0.130435	0.302326	1	0.464286	0.44186	0.863636	0.584615	0.0930233	1	0.170213
4	14	24	6	28	4	25	3	18	83	4	0	39	86	14	0	29	86	21	3	22	83	6	0	37	86	0.581395	0.892857	0.704225	0.0930233	1	0.170213	0.325581	1	0.491228	0.488372	0.875	0.626866	0.139535	1	0.244898
5	14	24	9	28	5	25	3	18	83	5	0	38	86	14	0	29	86	21	3	22	83	9	0	34	86	0.581395	0.892857	0.704225	0.116279	1	0.208333	0.325581	1	0.491228	0.488372	0.875	0.626866	0.209302	1	0.346154
6	15	24	9	28	6	25	3	18	83	6	0	37	86	15	0	28	86	21	3	22	83	9	0	34	86	0.581395	0.892857	0.704225	0.139535	1	0.244898	0.348837	1	0.517241	0.488372	0.875	0.626866	0.209302	1	0.346154
7	15	24	25	39	9	31	8	12	78	9	0	34	86	15	0	28	86	21	3	22	83	20	5	23	81	0.72093	0.794872	0.756098	0.209302	1	0.346154	0.348837	1	0.517241	0.488372	0.875	0.626866	0.465116	0.8	0.588235
8	15	32	25	45	9	34	11	9	75	9	0	34	86	15	0	28	86	26	6	17	80	20	5	23	81	0.790698	0.755556	0.772727	0.209302	1	0.346154	0.348837	1	0.517241	0.604651	0.8125	0.693333	0.465116	0.8	0.588235
9	15	32	25	45	9	34	11	9	75	9	0	34	86	15	0	28	86	26	6	17	80	20	5	23	81	0.790698	0.755556	0.772727	0.209302	1	0.346154	0.348837	1	0.517241	0.604651	0.8125	0.693333	0.465116	0.8	0.588235
10	15	32	25	45	9	34	11	9	75	9	0	34	86	15	0	28	86	26	6	17	80	20	5	23	81	0.790698	0.755556	0.772727	0.209302	1	0.346154	0.348837	1	0.517241	0.604651	0.8125	0.693333	0.465116	0.8	0.588235
																										Union			Intersect			KEGG			GO			OMIM
n	KEGG	GO	OMIM	Union	Intersect	TP	FP	FN	TN	TP	FP	FN	TN	TP	FP	FN	TN	TP	FP	FN	TN	TP	FP	FN	TN	Sensitivity	Precision	F-score	Sensitivity	Precision	F-score	Sensitivity	Precision	F-score	Sensitivity	Precision	F-score	Sensitivity	Precision	F-score
1	12	9	4	18	0	17	1	26	85	0	0	43	86	12	0	31	86	8	1	35	85	4	0	39	86	0.395349	0.944444	0.557377	0	N/A	N/A	0.27907	1	0.436364	0.186047	0.888889	0.307692	0.0930233	1	0.170213
2	13	11	4	19	0	18	1	25	85	0	0	43	86	13	0	30	86	10	1	33	85	4	0	39	86	0.418605	0.947368	0.580645	0	N/A	N/A	0.302326	1	0.464286	0.232558	0.909091	0.37037	0.0930233	1	0.170213
3	14	20	4	24	3	22	2	21	84	3	0	40	86	13	1	30	85	19	1	24	85	4	0	39	86	0.511628	0.916667	0.656716	0.0697674	1	0.130435	0.302326	0.928571	0.45614	0.44186	0.95	0.603175	0.0930233	1	0.170213
4	15	20	6	25	4	23	2	20	84	4	0	39	86	14	1	29	85	19	1	24	85	6	0	37	86	0.534884	0.92	0.676471	0.0930233	1	0.170213	0.325581	0.933333	0.482759	0.44186	0.95	0.603175	0.139535	1	0.244898
5	15	22	9	27	5	25	2	18	84	5	0	38	86	14	1	29	85	21	1	22	85	9	0	34	86	0.581395	0.925926	0.714286	0.116279	1	0.208333	0.325581	0.933333	0.482759	0.488372	0.954545	0.646154	0.209302	1	0.346154
6	16	22	9	27	6	25	2	18	84	6	0	37	86	15	1	28	85	21	1	22	85	9	0	34	86	0.581395	0.925926	0.714286	0.139535	1	0.244898	0.348837	0.9375	0.508475	0.488372	0.954545	0.646154	0.209302	1	0.346154
7	16	22	10	27	7	25	2	18	84	7	0	36	86	15	1	28	85	21	1	22	85	10	0	33	86	0.581395	0.925926	0.714286	0.162791	1	0.28	0.348837	0.9375	0.508475	0.488372	0.954545	0.646154	0.232558	1	0.377358
8	16	22	25	37	10	31	6	12	80	10	0	33	86	15	1	28	85	21	1	22	85	21	4	22	82	0.72093	0.837838	0.775	0.232558	1	0.377358	0.348837	0.9375	0.508475	0.488372	0.954545	0.646154	0.488372	0.84	0.617647
9	22	22	25	40	11	33	7	10	79	11	0	32	86	20	2	23	84	21	1	22	85	21	4	22	82	0.767442	0.825	0.795181	0.255814	1	0.407407	0.465116	0.909091	0.615385	0.488372	0.954545	0.646154	0.488372	0.84	0.617647
10	22	23	25	40	11	33	7	10	79	11	0	32	86	20	2	23	84	22	1	21	85	21	4	22	82	0.767442	0.825	0.795181	0.255814	1	0.407407	0.465116	0.909091	0.615385	0.511628	0.956522	0.666667	0.488372	0.84	0.617647
																										Union			Intersect			KEGG			GO			OMIM
n	KEGG	GO	OMIM	Union	Intersect	TP	FP	FN	TN	TP	FP	FN	TN	TP	FP	FN	TN	TP	FP	FN	TN	TP	FP	FN	TN	Sensitivity	Precision	F-score	Sensitivity	Precision	F-score	Sensitivity	Precision	F-score	Sensitivity	Precision	F-score	Sensitivity	Precision	F-score
1	12	8	4	17	0	17	0	26	86	0	0	43	86	12	0	31	86	8	0	35	86	4	0	39	86	0.395349	1	0.566667	0	N/A	N/A	0.27907	1	0.436364	0.186047	1	0.313725	0.0930233	1	0.170213
2	13	10	4	18	0	18	0	25	86	0	0	43	86	13	0	30	86	10	0	33	86	4	0	39	86	0.418605	1	0.590164	0	N/A	N/A	0.302326	1	0.464286	0.232558	1	0.377358	0.0930233	1	0.170213
3	13	10	4	18	0	18	0	25	86	0	0	43	86	13	0	30	86	10	0	33	86	4	0	39	86	0.418605	1	0.590164	0	N/A	N/A	0.302326	1	0.464286	0.232558	1	0.377358	0.0930233	1	0.170213
4	14	17	6	25	1	23	2	20	84	1	0	42	86	14	0	29	86	15	2	28	84	6	0	37	86	0.534884	0.92	0.676471	0.0232558	1	0.0454545	0.325581	1	0.491228	0.348837	0.882353	0.5	0.139535	1	0.244898
5	14	17	9	27	2	25	2	18	84	2	0	41	86	14	0	29	86	15	2	28	84	9	0	34	86	0.581395	0.925926	0.714286	0.0465116	1	0.0888889	0.325581	1	0.491228	0.348837	0.882353	0.5	0.209302	1	0.346154
6	15	24	9	28	6	26	2	17	84	6	0	37	86	15	0	28	86	22	2	21	84	9	0	34	86	0.604651	0.928571	0.732394	0.139535	1	0.244898	0.348837	1	0.517241	0.511628	0.916667	0.656716	0.209302	1	0.346154
7	15	24	26	38	9	32	6	11	80	9	0	34	86	15	0	28	86	22	2	21	84	20	6	23	80	0.744186	0.842105	0.790123	0.209302	1	0.346154	0.348837	1	0.517241	0.511628	0.916667	0.656716	0.465116	0.769231	0.57971
8	15	25	26	39	9	33	6	10	80	9	0	34	86	15	0	28	86	23	2	20	84	20	6	23	80	0.767442	0.846154	0.804878	0.209302	1	0.346154	0.348837	1	0.517241	0.534884	0.92	0.676471	0.465116	0.769231	0.57971
9	15	25	26	39	9	33	6	10	80	9	0	34	86	15	0	28	86	23	2	20	84	20	6	23	80	0.767442	0.846154	0.804878	0.209302	1	0.346154	0.348837	1	0.517241	0.534884	0.92	0.676471	0.465116	0.769231	0.57971
10	15	25	26	39	9	33	6	10	80	9	0	34	86	15	0	28	86	23	2	20	84	20	6	23	80	0.767442	0.846154	0.804878	0.209302	1	0.346154	0.348837	1	0.517241	0.534884	0.92	0.676471	0.465116	0.769231	0.57971
																										Union			Intersect			KEGG			GO			OMIM
n	KEGG	GO	OMIM	Union	Intersect	TP	FP	FN	TN	TP	FP	FN	TN	TP	FP	FN	TN	TP	FP	FN	TN	TP	FP	FN	TN	Sensitivity	Precision	F-score	Sensitivity	Precision	F-score	Sensitivity	Precision	F-score	Sensitivity	Precision	F-score	Sensitivity	Precision	F-score
1	12	7	4	18	0	17	1	26	85	0	0	43	86	12	0	31	86	6	1	37	85	4	0	39	86	0.395349	0.944444	0.557377	0	N/A	N/A	0.27907	1	0.436364	0.139535	0.857143	0.24	0.0930233	1	0.170213
2	13	7	4	18	0	17	1	26	85	0	0	43	86	13	0	30	86	6	1	37	85	4	0	39	86	0.395349	0.944444	0.557377	0	N/A	N/A	0.302326	1	0.464286	0.139535	0.857143	0.24	0.0930233	1	0.170213
3	13	10	4	18	0	17	1	26	85	0	0	43	86	13	0	30	86	9	1	34	85	4	0	39	86	0.395349	0.944444	0.557377	0	N/A	N/A	0.302326	1	0.464286	0.209302	0.9	0.339623	0.0930233	1	0.170213
4	14	16	6	25	1	24	1	19	85	1	0	42	86	14	0	29	86	15	1	28	85	6	0	37	86	0.55814	0.96	0.705882	0.0232558	1	0.0454545	0.325581	1	0.491228	0.348837	0.9375	0.508475	0.139535	1	0.244898
5	14	23	9	27	5	26	1	17	85	5	0	38	86	14	0	29	86	22	1	21	85	9	0	34	86	0.604651	0.962963	0.742857	0.116279	1	0.208333	0.325581	1	0.491228	0.511628	0.956522	0.666667	0.209302	1	0.346154
6	15	23	9	27	6	26	1	17	85	6	0	37	86	15	0	28	86	22	1	21	85	9	0	34	86	0.604651	0.962963	0.742857	0.139535	1	0.244898	0.348837	1	0.517241	0.511628	0.956522	0.666667	0.209302	1	0.346154
7	15	23	10	27	7	26	1	17	85	7	0	36	86	15	0	28	86	22	1	21	85	10	0	33	86	0.604651	0.962963	0.742857	0.162791	1	0.28	0.348837	1	0.517241	0.511628	0.956522	0.666667	0.232558	1	0.377358
8	16	23	26	39	10	32	7	11	79	10	0	33	86	15	1	28	85	22	1	21	85	21	5	22	81	0.744186	0.820513	0.780488	0.232558	1	0.377358	0.348837	0.9375	0.508475	0.511628	0.956522	0.666667	0.488372	0.807692	0.608696
9	16	23	26	39	10	32	7	11	79	10	0	33	86	15	1	28	85	22	1	21	85	21	5	22	81	0.744186	0.820513	0.780488	0.232558	1	0.377358	0.348837	0.9375	0.508475	0.511628	0.956522	0.666667	0.488372	0.807692	0.608696
10	16	23	26	39	10	32	7	11	79	10	0	33	86	15	1	28	85	22	1	21	85	21	5	22	81	0.744186	0.820513	0.780488	0.232558	1	0.377358	0.348837	0.9375	0.508475	0.511628	0.956522	0.666667	0.488372	0.807692	0.608696
																										Union			Intersect			KEGG			GO			OMIM
n	KEGG	GO	OMIM	Union	Intersect	TP	FP	FN	TN	TP	FP	FN	TN	TP	FP	FN	TN	TP	FP	FN	TN	TP	FP	FN	TN	Sensitivity	Precision	F-score	Sensitivity	Precision	F-score	Sensitivity	Precision	F-score	Sensitivity	Precision	F-score	Sensitivity	Precision	F-score
1	12	3	4	12	0	12	0	31	86	0	0	43	86	12	0	31	86	3	0	40	86	4	0	39	86	0.27907	1	0.436364	0	N/A	N/A	0.27907	1	0.436364	0.0697674	1	0.130435	0.0930233	1	0.170213
2	13	10	4	18	0	17	1	26	85	0	0	43	86	13	0	30	86	9	1	34	85	4	0	39	86	0.395349	0.944444	0.557377	0	N/A	N/A	0.302326	1	0.464286	0.209302	0.9	0.339623	0.0930233	1	0.170213
3	13	10	4	18	0	17	1	26	85	0	0	43	86	13	0	30	86	9	1	34	85	4	0	39	86	0.395349	0.944444	0.557377	0	N/A	N/A	0.302326	1	0.464286	0.209302	0.9	0.339623	0.0930233	1	0.170213
4	14	17	6	22	4	20	2	23	84	4	0	39	86	14	0	29	86	15	2	28	84	6	0	37	86	0.465116	0.909091	0.615385	0.0930233	1	0.170213	0.325581	1	0.491228	0.348837	0.882353	0.5	0.139535	1	0.244898
5	14	28	9	31	5	24	7	19	79	5	0	38	86	14	0	29	86	21	7	22	79	9	0	34	86	0.55814	0.774194	0.648649	0.116279	1	0.208333	0.325581	1	0.491228	0.488372	0.75	0.591549	0.209302	1	0.346154
6	14	28	9	31	5	24	7	19	79	5	0	38	86	14	0	29	86	21	7	22	79	9	0	34	86	0.55814	0.774194	0.648649	0.116279	1	0.208333	0.325581	1	0.491228	0.488372	0.75	0.591549	0.209302	1	0.346154
7	15	33	10	36	7	29	7	14	79	7	0	36	86	15	0	28	86	26	7	17	79	10	0	33	86	0.674419	0.805556	0.734177	0.162791	1	0.28	0.348837	1	0.517241	0.604651	0.787879	0.684211	0.232558	1	0.377358
8	16	33	24	44	10	34	10	9	76	10	0	33	86	15	1	28	85	26	7	17	79	21	3	22	83	0.790698	0.772727	0.781609	0.232558	1	0.377358	0.348837	0.9375	0.508475	0.604651	0.787879	0.684211	0.488372	0.875	0.626866
9	22	33	24	45	11	35	10	8	76	11	0	32	86	20	2	23	84	26	7	17	79	21	3	22	83	0.813953	0.777778	0.795455	0.255814	1	0.407407	0.465116	0.909091	0.615385	0.604651	0.787879	0.684211	0.488372	0.875	0.626866
10	22	33	24	45	11	35	10	8	76	11	0	32	86	20	2	23	84	26	7	17	79	21	3	22	83	0.813953	0.777778	0.795455	0.255814	1	0.407407	0.465116	0.909091	0.615385	0.604651	0.787879	0.684211	0.488372	0.875	0.626866
																										Union			Intersect			KEGG			GO			OMIM
n	KEGG	GO	OMIM	Union	Intersect	TP	FP	FN	TN	TP	FP	FN	TN	TP	FP	FN	TN	TP	FP	FN	TN	TP	FP	FN	TN	Sensitivity	Precision	F-score	Sensitivity	Precision	F-score	Sensitivity	Precision	F-score	Sensitivity	Precision	F-score	Sensitivity	Precision	F-score
1	12	3	4	12	0	12	0	31	86	0	0	43	86	12	0	31	86	3	0	40	86	4	0	39	86	0.27907	1	0.436364	0	N/A	N/A	0.27907	1	0.436364	0.0697674	1	0.130435	0.0930233	1	0.170213
2	13	10	4	18	0	18	0	25	86	0	0	43	86	13	0	30	86	10	0	33	86	4	0	39	86	0.418605	1	0.590164	0	N/A	N/A	0.302326	1	0.464286	0.232558	1	0.377358	0.0930233	1	0.170213
3	13	10	4	18	0	18	0	25	86	0	0	43	86	13	0	30	86	10	0	33	86	4	0	39	86	0.418605	1	0.590164	0	N/A	N/A	0.302326	1	0.464286	0.232558	1	0.377358	0.0930233	1	0.170213
4	14	18	6	27	1	25	2	18	84	1	0	42	86	14	0	29	86	16	2	27	84	6	0	37	86	0.581395	0.925926	0.714286	0.0232558	1	0.0454545	0.325581	1	0.491228	0.372093	0.888889	0.52459	0.139535	1	0.244898
5	14	18	9	28	2	26	2	17	84	2	0	41	86	14	0	29	86	16	2	27	84	9	0	34	86	0.604651	0.928571	0.732394	0.0465116	1	0.0888889	0.325581	1	0.491228	0.372093	0.888889	0.52459	0.209302	1	0.346154
6	15	24	9	28	6	26	2	17	84	6	0	37	86	15	0	28	86	22	2	21	84	9	0	34	86	0.604651	0.928571	0.732394	0.139535	1	0.244898	0.348837	1	0.517241	0.511628	0.916667	0.656716	0.209302	1	0.346154
7	15	24	10	28	7	26	2	17	84	7	0	36	86	15	0	28	86	22	2	21	84	10	0	33	86	0.604651	0.928571	0.732394	0.162791	1	0.28	0.348837	1	0.517241	0.511628	0.916667	0.656716	0.232558	1	0.377358
8	15	31	24	41	10	34	7	9	79	10	0	33	86	15	0	28	86	26	5	17	81	21	3	22	83	0.790698	0.829268	0.809524	0.232558	1	0.377358	0.348837	1	0.517241	0.604651	0.83871	0.702703	0.488372	0.875	0.626866
9	15	31	24	41	10	34	7	9	79	10	0	33	86	15	0	28	86	26	5	17	81	21	3	22	83	0.790698	0.829268	0.809524	0.232558	1	0.377358	0.348837	1	0.517241	0.604651	0.83871	0.702703	0.488372	0.875	0.626866
10	15	31	24	41	10	34	7	9	79	10	0	33	86	15	0	28	86	26	5	17	81	21	3	22	83	0.790698	0.829268	0.809524	0.232558	1	0.377358	0.348837	1	0.517241	0.604651	0.83871	0.702703	0.488372	0.875	0.626866
[truncated: 7 more columns]

## Sheet: epil
Test1						Union				Intersect				KEGG				GO				OMIM				Union			Intersect			KEGG			GO			OMIM				Union			Intersect			KEGG
n	KEGG	GO	OMIM	Union	Intersect	TP	FP	FN	TN	TP	FP	FN	TN	TP	FP	FN	TN	TP	FP	FN	TN	TP	FP	FN	TN	Sensitivity	Precision	F-score	Sensitivity	Precision	F-score	Sensitivity	Precision	F-score	Sensitivity	Precision	F-score	Sensitivity	Precision	F-score		Sensitivity (S)	Precision (P)	F-score (F)	Sensitivity (S)	Precision (P)	F-score (F)	Sensitivity (S)	Precision (P)
1	10	14	3	21	0	17	4	19	68	0	0	36	72	9	1	27	71	10	4	26	68	3	0	33	72	0.472222	0.809524	0.596491	0	N/A	N/A	0.25	0.9	0.391304	0.277778	0.714286	0.4	0.0833333	1	0.153846		0.477778	0.876146	0.612751	0.0138889	1	0.0540541	0.25	0.943636
2	10	16	3	22	0	18	4	18	68	0	0	36	72	9	1	27	71	12	4	24	68	3	0	33	72	0.5	0.818182	0.62069	0	N/A	N/A	0.25	0.9	0.391304	0.333333	0.75	0.461538	0.0833333	1	0.153846		0.530556	0.845205	0.649392	0.0194444	1	0.0540541	0.280556	0.900646
3	10	16	25	32	1	25	7	11	65	1	0	35	72	9	1	27	71	12	4	24	68	19	6	17	66	0.694444	0.78125	0.735294	0.0277778	1	0.0540541	0.25	0.9	0.391304	0.333333	0.75	0.461538	0.527778	0.76	0.622951		0.730556	0.797029	0.760887	0.0972222	1	0.175932	0.286111	0.897281
4	10	25	25	35	4	26	9	10	63	4	0	32	72	9	1	27	71	19	6	17	66	19	6	17	66	0.722222	0.742857	0.732394	0.111111	1	0.2	0.25	0.9	0.391304	0.527778	0.76	0.622951	0.527778	0.76	0.622951		0.738889	0.789048	0.761957	0.113889	1	0.20439	0.286111	0.897281
5	10	25	25	35	4	26	9	10	63	4	0	32	72	9	1	27	71	19	6	17	66	19	6	17	66	0.722222	0.742857	0.732394	0.111111	1	0.2	0.25	0.9	0.391304	0.527778	0.76	0.622951	0.527778	0.76	0.622951		0.738889	0.786863	0.760911	0.113889	1	0.20439	0.286111	0.897281
6	10	25	25	35	4	26	9	10	63	4	0	32	72	9	1	27	71	19	6	17	66	19	6	17	66	0.722222	0.742857	0.732394	0.111111	1	0.2	0.25	0.9	0.391304	0.527778	0.76	0.622951	0.527778	0.76	0.622951		0.738889	0.786863	0.760911	0.113889	1	0.20439	0.286111	0.897281
7	10	27	25	36	4	27	9	9	63	4	0	32	72	9	1	27	71	21	6	15	66	19	6	17	66	0.75	0.75	0.75	0.111111	1	0.2	0.25	0.9	0.391304	0.583333	0.777778	0.666667	0.527778	0.76	0.622951		0.744444	0.777289	0.758545	0.116667	1	0.20878	0.286111	0.897281
8	10	27	25	36	4	27	9	9	63	4	0	32	72	9	1	27	71	21	6	15	66	19	6	17	66	0.75	0.75	0.75	0.111111	1	0.2	0.25	0.9	0.391304	0.583333	0.777778	0.666667	0.527778	0.76	0.622951		0.75	0.769289	0.757665	0.116667	1	0.20878	0.286111	0.897281
9	10	27	25	36	4	27	9	9	63	4	0	32	72	9	1	27	71	21	6	15	66	19	6	17	66	0.75	0.75	0.75	0.111111	1	0.2	0.25	0.9	0.391304	0.583333	0.777778	0.666667	0.527778	0.76	0.622951		0.752778	0.76595	0.757448	0.116667	1	0.20878	0.286111	0.897281
10	10	27	25	36	4	27	9	9	63	4	0	32	72	9	1	27	71	21	6	15	66	19	6	17	66	0.75	0.75	0.75	0.111111	1	0.2	0.25	0.9	0.391304	0.583333	0.777778	0.666667	0.527778	0.76	0.622951		0.755556	0.759261	0.755414	0.122222	1	0.217561	0.286111	0.897281
																										Union			Intersect			KEGG			GO			OMIM
n	KEGG	GO	OMIM	Union	Intersect	TP	FP	FN	TN	TP	FP	FN	TN	TP	FP	FN	TN	TP	FP	FN	TN	TP	FP	FN	TN	Sensitivity	Precision	F-score	Sensitivity	Precision	F-score	Sensitivity	Precision	F-score	Sensitivity	Precision	F-score	Sensitivity	Precision	F-score		Stdev (S)	Stdev (P)	Stdev (F)	Stdev (S)	Stdev (P)	Stdev (F)	Stdev (S)	Stdev (P)
1	9	21	3	23	1	19	4	17	68	1	0	35	72	9	0	27	72	17	4	19	68	3	0	33	72	0.527778	0.826087	0.644068	0.0277778	1	0.0540541	0.25	1	0.4	0.472222	0.809524	0.596491	0.0833333	1	0.153846		0.0552461	0.0915649	0.0318157	0.0146402	0	0	0	0.0777082
2	13	21	3	27	1	21	6	15	66	1	0	35	72	11	2	25	70	17	4	19	68	3	0	33	72	0.583333	0.777778	0.666667	0.0277778	1	0.0540541	0.305556	0.846154	0.44898	0.472222	0.809524	0.596491	0.0833333	1	0.153846		0.0357412	0.0685081	0.0202991	0.0134179	0	0	0.0332561	0.0697127
3	16	21	23	39	4	28	11	8	61	4	0	32	72	13	3	23	69	17	4	19	68	19	4	17	68	0.777778	0.717949	0.746667	0.111111	1	0.2	0.361111	0.8125	0.5	0.472222	0.809524	0.596491	0.527778	0.826087	0.644068		0.0263523	0.0623728	0.0297099	0.0300034	0	0.0521562	0.0415121	0.0733529
4	16	21	23	39	4	28	11	8	61	4	0	32	72	13	3	23	69	17	4	19	68	19	4	17	68	0.777778	0.717949	0.746667	0.111111	1	0.2	0.361111	0.8125	0.5	0.472222	0.809524	0.596491	0.527778	0.826087	0.644068		0.0194224	0.0619023	0.0303549	0.0087841	0	0.0138832	0.0415121	0.0733529
5	16	22	23	39	4	28	11	8	61	4	0	32	72	13	3	23	69	17	5	19	67	19	4	17	68	0.777778	0.717949	0.746667	0.111111	1	0.2	0.361111	0.8125	0.5	0.472222	0.772727	0.586207	0.527778	0.826087	0.644068		0.0194224	0.0632283	0.0312534	0.0087841	0	0.0138832	0.0415121	0.0733529
6	16	22	23	39	4	28	11	8	61	4	0	32	72	13	3	23	69	17	5	19	67	19	4	17	68	0.777778	0.717949	0.746667	0.111111	1	0.2	0.361111	0.8125	0.5	0.472222	0.772727	0.586207	0.527778	0.826087	0.644068		0.0194224	0.0632283	0.0312534	0.0087841	0	0.0138832	0.0415121	0.0733529
7	16	24	23	41	4	28	13	8	59	4	0	32	72	13	3	23	69	17	7	19	65	19	4	17	68	0.777778	0.682927	0.727273	0.111111	1	0.2	0.361111	0.8125	0.5	0.472222	0.708333	0.566667	0.527778	0.826087	0.644068		0.0175682	0.0753632	0.0344721	0.0117121	0	0.0185109	0.0415121	0.0733529
8	16	24	23	41	4	28	13	8	59	4	0	32	72	13	3	23	69	17	7	19	65	19	4	17	68	0.777778	0.682927	0.727273	0.111111	1	0.2	0.361111	0.8125	0.5	0.472222	0.708333	0.566667	0.527778	0.826087	0.644068		0.0130946	0.0716509	0.03104	0.0117121	0	0.0185109	0.0415121	0.0733529
9	16	24	23	41	4	28	13	8	59	4	0	32	72	13	3	23	69	17	7	19	65	19	4	17	68	0.777778	0.682927	0.727273	0.111111	1	0.2	0.361111	0.8125	0.5	0.472222	0.708333	0.566667	0.527778	0.826087	0.644068		0.015768	0.0754915	0.036167	0.0117121	0	0.0185109	0.0415121	0.0733529
10	16	29	23	41	5	28	13	8	59	5	0	31	72	13	3	23	69	21	8	15	64	19	4	17	68	0.777778	0.682927	0.727273	0.138889	1	0.243902	0.361111	0.8125	0.5	0.583333	0.724138	0.646154	0.527778	0.826087	0.644068		0.0117121	0.0829684	0.0421613	0.0143444	0	0.0226711	0.0415121	0.0733529
																										Union			Intersect			KEGG			GO			OMIM				# Average of 10 repeats
n	KEGG	GO	OMIM	Union	Intersect	TP	FP	FN	TN	TP	FP	FN	TN	TP	FP	FN	TN	TP	FP	FN	TN	TP	FP	FN	TN	Sensitivity	Precision	F-score	Sensitivity	Precision	F-score	Sensitivity	Precision	F-score	Sensitivity	Precision	F-score	Sensitivity	Precision	F-score
1	9	8	3	16	0	15	1	21	71	0	0	36	72	9	0	27	72	7	1	29	71	3	0	33	72	0.416667	0.9375	0.576923	0	N/A	N/A	0.25	1	0.4	0.194444	0.875	0.318182	0.0833333	1	0.153846
2	9	19	3	21	1	19	2	17	70	1	0	35	72	9	0	27	72	17	2	19	70	3	0	33	72	0.527778	0.904762	0.666667	0.0277778	1	0.0540541	0.25	1	0.4	0.472222	0.894737	0.618182	0.0833333	1	0.153846
3	9	19	22	30	4	26	4	10	68	4	0	32	72	9	0	27	72	17	2	19	70	19	3	17	69	0.722222	0.866667	0.787879	0.111111	1	0.2	0.25	1	0.4	0.472222	0.894737	0.618182	0.527778	0.863636	0.655172
4	9	19	22	30	4	26	4	10	68	4	0	32	72	9	0	27	72	17	2	19	70	19	3	17	69	0.722222	0.866667	0.787879	0.111111	1	0.2	0.25	1	0.4	0.472222	0.894737	0.618182	0.527778	0.863636	0.655172
5	9	19	22	30	4	26	4	10	68	4	0	32	72	9	0	27	72	17	2	19	70	19	3	17	69	0.722222	0.866667	0.787879	0.111111	1	0.2	0.25	1	0.4	0.472222	0.894737	0.618182	0.527778	0.863636	0.655172
6	9	19	22	30	4	26	4	10	68	4	0	32	72	9	0	27	72	17	2	19	70	19	3	17	69	0.722222	0.866667	0.787879	0.111111	1	0.2	0.25	1	0.4	0.472222	0.894737	0.618182	0.527778	0.863636	0.655172
7	9	19	22	30	4	26	4	10	68	4	0	32	72	9	0	27	72	17	2	19	70	19	3	17	69	0.722222	0.866667	0.787879	0.111111	1	0.2	0.25	1	0.4	0.472222	0.894737	0.618182	0.527778	0.863636	0.655172
8	9	19	22	30	4	26	4	10	68	4	0	32	72	9	0	27	72	17	2	19	70	19	3	17	69	0.722222	0.866667	0.787879	0.111111	1	0.2	0.25	1	0.4	0.472222	0.894737	0.618182	0.527778	0.863636	0.655172
9	9	19	22	30	4	26	4	10	68	4	0	32	72	9	0	27	72	17	2	19	70	19	3	17	69	0.722222	0.866667	0.787879	0.111111	1	0.2	0.25	1	0.4	0.472222	0.894737	0.618182	0.527778	0.863636	0.655172
10	9	21	22	31	4	27	4	9	68	4	0	32	72	9	0	27	72	19	2	17	70	19	3	17	69	0.75	0.870968	0.80597	0.111111	1	0.2	0.25	1	0.4	0.527778	0.904762	0.666667	0.527778	0.863636	0.655172
																										Union			Intersect			KEGG			GO			OMIM
n	KEGG	GO	OMIM	Union	Intersect	TP	FP	FN	TN	TP	FP	FN	TN	TP	FP	FN	TN	TP	FP	FN	TN	TP	FP	FN	TN	Sensitivity	Precision	F-score	Sensitivity	Precision	F-score	Sensitivity	Precision	F-score	Sensitivity	Precision	F-score	Sensitivity	Precision	F-score
1	9	6	3	15	0	15	0	21	72	0	0	36	72	9	0	27	72	6	0	30	72	3	0	33	72	0.416667	1	0.588235	0	N/A	N/A	0.25	1	0.4	0.166667	1	0.285714	0.0833333	1	0.153846
2	13	7	3	19	0	18	1	18	71	0	0	36	72	12	1	24	71	7	0	29	72	3	0	33	72	0.5	0.947368	0.654545	0	N/A	N/A	0.333333	0.923077	0.489796	0.194444	1	0.325581	0.0833333	1	0.153846
3	13	19	20	31	4	27	4	9	68	4	0	32	72	12	1	24	71	17	2	19	70	19	1	17	71	0.75	0.870968	0.80597	0.111111	1	0.2	0.333333	0.923077	0.489796	0.472222	0.894737	0.618182	0.527778	0.95	0.678571
4	13	20	20	32	4	27	5	9	67	4	0	32	72	12	1	24	71	17	3	19	69	19	1	17	71	0.75	0.84375	0.794118	0.111111	1	0.2	0.333333	0.923077	0.489796	0.472222	0.85	0.607143	0.527778	0.95	0.678571
5	13	20	20	32	4	27	5	9	67	4	0	32	72	12	1	24	71	17	3	19	69	19	1	17	71	0.75	0.84375	0.794118	0.111111	1	0.2	0.333333	0.923077	0.489796	0.472222	0.85	0.607143	0.527778	0.95	0.678571
6	13	20	20	32	4	27	5	9	67	4	0	32	72	12	1	24	71	17	3	19	69	19	1	17	71	0.75	0.84375	0.794118	0.111111	1	0.2	0.333333	0.923077	0.489796	0.472222	0.85	0.607143	0.527778	0.95	0.678571
7	13	22	20	32	5	27	5	9	67	5	0	31	72	12	1	24	71	19	3	17	69	19	1	17	71	0.75	0.84375	0.794118	0.138889	1	0.243902	0.333333	0.923077	0.489796	0.527778	0.863636	0.655172	0.527778	0.95	0.678571
8	13	22	20	32	5	27	5	9	67	5	0	31	72	12	1	24	71	19	3	17	69	19	1	17	71	0.75	0.84375	0.794118	0.138889	1	0.243902	0.333333	0.923077	0.489796	0.527778	0.863636	0.655172	0.527778	0.95	0.678571
9	13	22	20	32	5	27	5	9	67	5	0	31	72	12	1	24	71	19	3	17	69	19	1	17	71	0.75	0.84375	0.794118	0.138889	1	0.243902	0.333333	0.923077	0.489796	0.527778	0.863636	0.655172	0.527778	0.95	0.678571
10	13	22	20	32	5	27	5	9	67	5	0	31	72	12	1	24	71	19	3	17	69	19	1	17	71	0.75	0.84375	0.794118	0.138889	1	0.243902	0.333333	0.923077	0.489796	0.527778	0.863636	0.655172	0.527778	0.95	0.678571
																										Union			Intersect			KEGG			GO			OMIM
n	KEGG	GO	OMIM	Union	Intersect	TP	FP	FN	TN	TP	FP	FN	TN	TP	FP	FN	TN	TP	FP	FN	TN	TP	FP	FN	TN	Sensitivity	Precision	F-score	Sensitivity	Precision	F-score	Sensitivity	Precision	F-score	Sensitivity	Precision	F-score	Sensitivity	Precision	F-score
1	9	6	3	15	0	15	0	21	72	0	0	36	72	9	0	27	72	6	0	30	72	3	0	33	72	0.416667	1	0.588235	0	N/A	N/A	0.25	1	0.4	0.166667	1	0.285714	0.0833333	1	0.153846
2	12	7	3	18	0	17	1	19	71	0	0	36	72	11	1	25	71	7	0	29	72	3	0	33	72	0.472222	0.944444	0.62963	0	N/A	N/A	0.305556	0.916667	0.458333	0.194444	1	0.325581	0.0833333	1	0.153846
3	12	9	23	30	2	25	5	11	67	2	0	34	72	11	1	25	71	9	0	27	72	19	4	17	68	0.694444	0.833333	0.757576	0.0555556	1	0.105263	0.305556	0.916667	0.458333	0.25	1	0.4	0.527778	0.826087	0.644068
4	12	19	23	32	5	27	5	9	67	5	0	31	72	11	1	25	71	19	0	17	72	19	4	17	68	0.75	0.84375	0.794118	0.138889	1	0.243902	0.305556	0.916667	0.458333	0.527778	1	0.690909	0.527778	0.826087	0.644068
5	12	19	23	32	5	27	5	9	67	5	0	31	72	11	1	25	71	19	0	17	72	19	4	17	68	0.75	0.84375	0.794118	0.138889	1	0.243902	0.305556	0.916667	0.458333	0.527778	1	0.690909	0.527778	0.826087	0.644068
6	12	19	23	32	5	27	5	9	67	5	0	31	72	11	1	25	71	19	0	17	72	19	4	17	68	0.75	0.84375	0.794118	0.138889	1	0.243902	0.305556	0.916667	0.458333	0.527778	1	0.690909	0.527778	0.826087	0.644068
7	12	22	23	32	5	27	5	9	67	5	0	31	72	11	1	25	71	21	1	15	71	19	4	17	68	0.75	0.84375	0.794118	0.138889	1	0.243902	0.305556	0.916667	0.458333	0.583333	0.954545	0.724138	0.527778	0.826087	0.644068
8	12	28	23	36	5	27	9	9	63	5	0	31	72	11	1	25	71	22	6	14	66	19	4	17	68	0.75	0.75	0.75	0.138889	1	0.243902	0.305556	0.916667	0.458333	0.611111	0.785714	0.6875	0.527778	0.826087	0.644068
9	12	28	23	36	5	27	9	9	63	5	0	31	72	11	1	25	71	22	6	14	66	19	4	17	68	0.75	0.75	0.75	0.138889	1	0.243902	0.305556	0.916667	0.458333	0.611111	0.785714	0.6875	0.527778	0.826087	0.644068
10	12	28	23	36	5	27	9	9	63	5	0	31	72	11	1	25	71	22	6	14	66	19	4	17	68	0.75	0.75	0.75	0.138889	1	0.243902	0.305556	0.916667	0.458333	0.611111	0.785714	0.6875	0.527778	0.826087	0.644068
																										Union			Intersect			KEGG			GO			OMIM
n	KEGG	GO	OMIM	Union	Intersect	TP	FP	FN	TN	TP	FP	FN	TN	TP	FP	FN	TN	TP	FP	FN	TN	TP	FP	FN	TN	Sensitivity	Precision	F-score	Sensitivity	Precision	F-score	Sensitivity	Precision	F-score	Sensitivity	Precision	F-score	Sensitivity	Precision	F-score
1	10	21	3	23	1	19	4	17	68	1	0	35	72	9	1	27	71	17	4	19	68	3	0	33	72	0.527778	0.826087	0.644068	0.0277778	1	0.0540541	0.25	0.9	0.391304	0.472222	0.809524	0.596491	0.0833333	1	0.153846
2	10	21	3	23	1	19	4	17	68	1	0	35	72	9	1	27	71	17	4	19	68	3	0	33	72	0.527778	0.826087	0.644068	0.0277778	1	0.0540541	0.25	0.9	0.391304	0.472222	0.809524	0.596491	0.0833333	1	0.153846
3	10	22	23	34	4	26	8	10	64	4	0	32	72	9	1	27	71	17	5	19	67	19	4	17	68	0.722222	0.764706	0.742857	0.111111	1	0.2	0.25	0.9	0.391304	0.472222	0.772727	0.586207	0.527778	0.826087	0.644068
4	10	22	23	34	4	26	8	10	64	4	0	32	72	9	1	27	71	17	5	19	67	19	4	17	68	0.722222	0.764706	0.742857	0.111111	1	0.2	0.25	0.9	0.391304	0.472222	0.772727	0.586207	0.527778	0.826087	0.644068
5	10	23	23	35	4	26	9	10	63	4	0	32	72	9	1	27	71	17	6	19	66	19	4	17	68	0.722222	0.742857	0.732394	0.111111	1	0.2	0.25	0.9	0.391304	0.472222	0.73913	0.576271	0.527778	0.826087	0.644068
6	10	23	23	35	4	26	9	10	63	4	0	32	72	9	1	27	71	17	6	19	66	19	4	17	68	0.722222	0.742857	0.732394	0.111111	1	0.2	0.25	0.9	0.391304	0.472222	0.73913	0.576271	0.527778	0.826087	0.644068
7	10	31	23	40	4	27	13	9	59	4	0	32	72	9	1	27	71	21	10	15	62	19	4	17	68	0.75	0.675	0.710526	0.111111	1	0.2	0.25	0.9	0.391304	0.583333	0.677419	0.626866	0.527778	0.826087	0.644068
8	10	32	23	40	4	27	13	9	59	4	0	32	72	9	1	27	71	21	11	15	61	19	4	17	68	0.75	0.675	0.710526	0.111111	1	0.2	0.25	0.9	0.391304	0.583333	0.65625	0.617647	0.527778	0.826087	0.644068
9	10	32	23	40	4	27	13	9	59	4	0	32	72	9	1	27	71	21	11	15	61	19	4	17	68	0.75	0.675	0.710526	0.111111	1	0.2	0.25	0.9	0.391304	0.583333	0.65625	0.617647	0.527778	0.826087	0.644068
10	10	32	23	40	4	27	13	9	59	4	0	32	72	9	1	27	71	21	11	15	61	19	4	17	68	0.75	0.675	0.710526	0.111111	1	0.2	0.25	0.9	0.391304	0.583333	0.65625	0.617647	0.527778	0.826087	0.644068
																										Union			Intersect			KEGG			GO			OMIM
n	KEGG	GO	OMIM	Union	Intersect	TP	FP	FN	TN	TP	FP	FN	TN	TP	FP	FN	TN	TP	FP	FN	TN	TP	FP	FN	TN	Sensitivity	Precision	F-score	Sensitivity	Precision	F-score	Sensitivity	Precision	F-score	Sensitivity	Precision	F-score	Sensitivity	Precision	F-score
1	11	21	3	25	1	19	6	17	66	1	0	35	72	9	2	27	70	17	4	19	68	3	0	33	72	0.527778	0.76	0.622951	0.0277778	1	0.0540541	0.25	0.818182	0.382979	0.472222	0.809524	0.596491	0.0833333	1	0.153846
2	14	21	3	27	1	21	6	15	66	1	0	35	72	11	3	25	69	17	4	19	68	3	0	33	72	0.583333	0.777778	0.666667	0.0277778	1	0.0540541	0.305556	0.785714	0.44	0.472222	0.809524	0.596491	0.0833333	1	0.153846
3	14	21	25	37	4	27	10	9	62	4	0	32	72	11	3	25	69	17	4	19	68	19	6	17	66	0.75	0.72973	0.739726	0.111111	1	0.2	0.305556	0.785714	0.44	0.472222	0.809524	0.596491	0.527778	0.76	0.622951
4	14	25	25	37	4	27	10	9	62	4	0	32	72	11	3	25	69	19	6	17	66	19	6	17	66	0.75	0.72973	0.739726	0.111111	1	0.2	0.305556	0.785714	0.44	0.527778	0.76	0.622951	0.527778	0.76	0.622951
5	14	25	25	37	4	27	10	9	62	4	0	32	72	11	3	25	69	19	6	17	66	19	6	17	66	0.75	0.72973	0.739726	0.111111	1	0.2	0.305556	0.785714	0.44	0.527778	0.76	0.622951	0.527778	0.76	0.622951
6	14	25	25	37	4	27	10	9	62	4	0	32	72	11	3	25	69	19	6	17	66	19	6	17	66	0.75	0.72973	0.739726	0.111111	1	0.2	0.305556	0.785714	0.44	0.527778	0.76	0.622951	0.527778	0.76	0.622951
7	14	25	25	37	4	27	10	9	62	4	0	32	72	11	3	25	69	19	6	17	66	19	6	17	66	0.75	0.72973	0.739726	0.111111	1	0.2	0.305556	0.785714	0.44	0.527778	0.76	0.622951	0.527778	0.76	0.622951
8	14	25	25	37	4	27	10	9	62	4	0	32	72	11	3	25	69	19	6	17	66	19	6	17	66	0.75	0.72973	0.739726	0.111111	1	0.2	0.305556	0.785714	0.44	0.527778	0.76	0.622951	0.527778	0.76	0.622951
9	14	25	25	37	4	27	10	9	62	4	0	32	72	11	3	25	69	19	6	17	66	19	6	17	66	0.75	0.72973	0.739726	0.111111	1	0.2	0.305556	0.785714	0.44	0.527778	0.76	0.622951	0.527778	0.76	0.622951
10	14	34	25	41	5	27	14	9	58	5	0	31	72	11	3	25	69	23	11	13	61	19	6	17	66	0.75	0.658537	0.701299	0.138889	1	0.243902	0.305556	0.785714	0.44	0.638889	0.676471	0.657143	0.527778	0.76	0.622951
																										Union			Intersect			KEGG			GO			OMIM
n	KEGG	GO	OMIM	Union	Intersect	TP	FP	FN	TN	TP	FP	FN	TN	TP	FP	FN	TN	TP	FP	FN	TN	TP	FP	FN	TN	Sensitivity	Precision	F-score	Sensitivity	Precision	F-score	Sensitivity	Precision	F-score	Sensitivity	Precision	F-score	Sensitivity	Precision	F-score
1	9	19	3	21	1	19	2	17	70	1	0	35	72	9	0	27	72	17	2	19	70	3	0	33	72	0.527778	0.904762	0.666667	0.0277778	1	0.0540541	0.25	1	0.4	0.472222	0.894737	0.618182	0.0833333	1	0.153846
2	12	19	3	23	1	20	3	16	69	1	0	35	72	11	1	25	71	17	2	19	70	3	0	33	72	0.555556	0.869565	0.677966	0.0277778	1	0.0540541	0.305556	0.916667	0.458333	0.472222	0.894737	0.618182	0.0833333	1	0.153846
3	12	19	20	31	4	27	4	9	68	4	0	32	72	11	1	25	71	17	2	19	70	19	1	17	71	0.75	0.870968	0.80597	0.111111	1	0.2	0.305556	0.916667	0.458333	0.472222	0.894737	0.618182	0.527778	0.95	0.678571
4	12	19	20	31	4	27	4	9	68	4	0	32	72	11	1	25	71	17	2	19	70	19	1	17	71	0.75	0.870968	0.80597	0.111111	1	0.2	0.305556	0.916667	0.458333	0.472222	0.894737	0.618182	0.527778	0.95	0.678571
5	12	19	20	31	4	27	4	9	68	4	0	32	72	11	1	25	71	17	2	19	70	19	1	17	71	0.75	0.870968	0.80597	0.111111	1	0.2	0.305556	0.916667	0.458333	0.472222	0.894737	0.618182	0.527778	0.95	0.678571
6	12	19	20	31	4	27	4	9	68	4	0	32	72	11	1	25	71	17	2	19	70	19	1	17	71	0.75	0.870968	0.80597	0.111111	1	0.2	0.305556	0.916667	0.458333	0.472222	0.894737	0.618182	0.527778	0.95	0.678571
7	12	19	20	31	4	27	4	9	68	4	0	32	72	11	1	25	71	17	2	19	70	19	1	17	71	0.75	0.870968	0.80597	0.111111	1	0.2	0.305556	0.916667	0.458333	0.472222	0.894737	0.618182	0.527778	0.95	0.678571
8	12	19	20	31	4	27	4	9	68	4	0	32	72	11	1	25	71	17	2	19	70	19	1	17	71	0.75	0.870968	0.80597	0.111111	1	0.2	0.305556	0.916667	0.458333	0.472222	0.894737	0.618182	0.527778	0.95	0.678571
9	12	21	20	32	4	28	4	8	68	4	0	32	72	11	1	25	71	19	2	17	70	19	1	17	71	0.777778	0.875	0.823529	0.111111	1	0.2	0.305556	0.916667	0.458333	0.527778	0.904762	0.666667	0.527778	0.95	0.678571
10	12	22	20	32	4	28	4	8	68	4	0	32	72	11	1	25	71	19	3	17	69	19	1	17	71	0.777778	0.875	0.823529	0.111111	1	0.2	0.305556	0.916667	0.458333	0.527778	0.863636	0.655172	0.527778	0.95	0.678571
																										Union			Intersect			KEGG			GO			OMIM
n	KEGG	GO	OMIM	Union	Intersect	TP	FP	FN	TN	TP	FP	FN	TN	TP	FP	FN	TN	TP	FP	FN	TN	TP	FP	FN	TN	Sensitivity	Precision	F-score	Sensitivity	Precision	F-score	Sensitivity	Precision	F-score	Sensitivity	Precision	F-score	Sensitivity	Precision	F-score
1	11	22	3	25	1	19	6	17	66	1	0	35	72	9	2	27	70	17	5	19	67	3	0	33	72	0.527778	0.76	0.622951	0.0277778	1	0.0540541	0.25	0.818182	0.382979	0.472222	0.772727	0.586207	0.0833333	1	0.153846
2	11	22	3	25	1	19	6	17	66	1	0	35	72	9	2	27	70	17	5	19	67	3	0	33	72	0.527778	0.76	0.622951	0.0277778	1	0.0540541	0.25	0.818182	0.382979	0.472222	0.772727	0.586207	0.0833333	1	0.153846
3	11	22	23	36	4	26	10	10	62	4	0	32	72	9	2	27	70	17	5	19	67	19	4	17	68	0.722222	0.722222	0.722222	0.111111	1	0.2	0.25	0.818182	0.382979	0.472222	0.772727	0.586207	0.527778	0.826087	0.644068
4	11	22	23	36	4	26	10	10	62	4	0	32	72	9	2	27	70	17	5	19	67	19	4	17	68	0.722222	0.722222	0.722222	0.111111	1	0.2	0.25	0.818182	0.382979	0.472222	0.772727	0.586207	0.527778	0.826087	0.644068
5	11	22	23	36	4	26	10	10	62	4	0	32	72	9	2	27	70	17	5	19	67	19	4	17	68	0.722222	0.722222	0.722222	0.111111	1	0.2	0.25	0.818182	0.382979	0.472222	0.772727	0.586207	0.527778	0.826087	0.644068
6	11	22	23	36	4	26	10	10	62	4	0	32	72	9	2	27	70	17	5	19	67	19	4	17	68	0.722222	0.722222	0.722222	0.111111	1	0.2	0.25	0.818182	0.382979	0.472222	0.772727	0.586207	0.527778	0.826087	0.644068
7	11	22	23	36	4	26	10	10	62	4	0	32	72	9	2	27	70	17	5	19	67	19	4	17	68	0.722222	0.722222	0.722222	0.111111	1	0.2	0.25	0.818182	0.382979	0.472222	0.772727	0.586207	0.527778	0.826087	0.644068
8	11	24	23	37	4	27	10	9	62	4	0	32	72	9	2	27	70	19	5	17	67	19	4	17	68	0.75	0.72973	0.739726	0.111111	1	0.2	0.25	0.818182	0.382979	0.527778	0.791667	0.633333	0.527778	0.826087	0.644068
9	11	28	23	39	4	27	12	9	60	4	0	32	72	9	2	27	70	21	7	15	65	19	4	17	68	0.75	0.692308	0.72	0.111111	1	0.2	0.25	0.818182	0.382979	0.583333	0.75	0.65625	0.527778	0.826087	0.644068
10	11	28	23	39	4	27	12	9	60	4	0	32	72	9	2	27	70	21	7	15	65	19	4	17	68	0.75	0.692308	0.72	0.111111	1	0.2	0.25	0.818182	0.382979	0.583333	0.75	0.65625	0.527778	0.826087	0.644068
																										Union			Intersect			KEGG			GO			OMIM
n	KEGG	GO	OMIM	Union	Intersect	TP	FP	FN	TN	TP	FP	FN	TN	TP	FP	FN	TN	TP	FP	FN	TN	TP	FP	FN	TN	Sensitivity	Precision	F-score	Sensitivity	Precision	F-score	Sensitivity	Precision	F-score	Sensitivity	Precision	F-score	Sensitivity	Precision	F-score
1	9	8	3	16	0	15	1	21	71	0	0	36	72	9	0	27	72	7	1	29	71	3	0	33	72	0.416667	0.9375	0.576923	0	N/A	N/A	0.25	1	0.4	0.194444	0.875	0.318182	0.0833333	1	0.153846
2	9	21	3	23	1	19	4	17	68	1	0	35	72	9	0	27	72	17	4	19	68	3	0	33	72	0.527778	0.826087	0.644068	0.0277778	1	0.0540541	0.25	1	0.4	0.472222	0.809524	0.596491	0.0833333	1	0.153846
3	9	21	22	32	4	26	6	10	66	4	0	32	72	9	0	27	72	17	4	19	68	19	3	17	69	0.722222	0.8125	0.764706	0.111111	1	0.2	0.25	1	0.4	0.472222	0.809524	0.596491	0.527778	0.863636	0.655172
4	9	25	22	33	4	26	7	10	65	4	0	32	72	9	0	27	72	19	6	17	66	19	3	17	69	0.722222	0.787879	0.753623	0.111111	1	0.2	0.25	1	0.4	0.527778	0.76	0.622951	0.527778	0.863636	0.655172
5	9	25	22	33	4	26	7	10	65	4	0	32	72	9	0	27	72	19	6	17	66	19	3	17	69	0.722222	0.787879	0.753623	0.111111	1	0.2	0.25	1	0.4	0.527778	0.76	0.622951	0.527778	0.863636	0.655172
6	9	25	22	33	4	26	7	10	65	4	0	32	72	9	0	27	72	19	6	17	66	19	3	17	69	0.722222	0.787879	0.753623	0.111111	1	0.2	0.25	1	0.4	0.527778	0.76	0.622951	0.527778	0.863636	0.655172
7	9	25	22	33	4	26	7	10	65	4	0	32	72	9	0	27	72	19	6	17	66	19	3	17	69	0.722222	0.787879	0.753623	0.111111	1	0.2	0.25	1	0.4	0.527778	0.76	0.622951	0.527778	0.863636	0.655172
8	9	27	22	34	4	27	7	9	65	4	0	32	72	9	0	27	72	21	6	15	66	19	3	17	69	0.75	0.794118	0.771429	0.111111	1	0.2	0.25	1	0.4	0.583333	0.777778	0.666667	0.527778	0.863636	0.655172
9	9	27	22	34	4	27	7	9	65	4	0	32	72	9	0	27	72	21	6	15	66	19	3	17	69	0.75	0.794118	0.771429	0.111111	1	0.2	0.25	1	0.4	0.583333	0.777778	0.666667	0.527778	0.863636	0.655172
10	9	27	22	34	4	27	7	9	65	4	0	32	72	9	0	27	72	21	6	15	66	19	3	17	69	0.75	0.794118	0.771429	0.111111	1	0.2	0.25	1	0.4	0.583333	0.777778	0.666667	0.527778	0.863636	0.655172
[truncated: 7 more columns]

## Sheet: grav
Test1						Union				Intersect				KEGG				GO				OMIM				Union			Intersect			KEGG			GO			OMIM				Union			Intersect			KEGG
n	KEGG	GO	OMIM	Union	Intersect	TP	FP	FN	TN	TP	FP	FN	TN	TP	FP	FN	TN	TP	FP	FN	TN	TP	FP	FN	TN	Sensitivity	Precision	F-score	Sensitivity	Precision	F-score	Sensitivity	Precision	F-score	Sensitivity	Precision	F-score	Sensitivity	Precision	F-score		Sensitivity (S)	Precision (P)	F-score (F)	Sensitivity (S)	Precision (P)	F-score (F)	Sensitivity (S)	Precision (P)
1	11	18	4	23	2	23	0	13	72	2	0	34	72	11	0	25	72	18	0	18	72	4	0	32	72	0.638889	1	0.779661	0.0555556	1	0.105263	0.305556	1	0.468085	0.5	1	0.666667	0.111111	1	0.2		0.638889	0.959628	0.766835	0.0555556	1	0.105263	0.305556	0.991667
2	14	18	6	25	3	25	0	11	72	3	0	33	72	14	0	22	72	18	0	18	72	6	0	30	72	0.694444	1	0.819672	0.0833333	1	0.153846	0.388889	1	0.56	0.5	1	0.666667	0.166667	1	0.285714		0.694444	0.962648	0.806618	0.0833333	1	0.153846	0.388889	0.993333
3	17	18	9	28	3	28	0	8	72	3	0	33	72	17	0	19	72	18	0	18	72	9	0	27	72	0.777778	1	0.875	0.0833333	1	0.153846	0.472222	1	0.641509	0.5	1	0.666667	0.25	1	0.4		0.777778	0.956967	0.857823	0.0833333	1	0.153846	0.472222	0.994444
4	18	18	9	28	3	28	0	8	72	3	0	33	72	18	0	18	72	18	0	18	72	9	0	27	72	0.777778	1	0.875	0.0833333	1	0.153846	0.5	1	0.666667	0.5	1	0.666667	0.25	1	0.4		0.777778	0.956967	0.857823	0.0833333	1	0.153846	0.5	0.994737
5	19	18	12	28	3	28	0	8	72	3	0	33	72	19	0	17	72	18	0	18	72	12	0	24	72	0.777778	1	0.875	0.0833333	1	0.153846	0.527778	1	0.690909	0.5	1	0.666667	0.333333	1	0.5		0.777778	0.953749	0.856517	0.0861111	1	0.158462	0.527778	0.995
6	19	18	13	28	3	28	0	8	72	3	0	33	72	19	0	17	72	18	0	18	72	13	0	23	72	0.777778	1	0.875	0.0833333	1	0.153846	0.527778	1	0.690909	0.5	1	0.666667	0.361111	1	0.530612		0.777778	0.934831	0.848761	0.102778	1	0.185478	0.552778	0.967078
7	21	18	15	29	5	29	0	7	72	5	0	31	72	21	0	15	72	18	0	18	72	15	0	21	72	0.805556	1	0.892308	0.138889	1	0.243902	0.583333	1	0.736842	0.5	1	0.666667	0.416667	1	0.588235		0.802778	0.933763	0.863004	0.138889	1	0.242438	0.569444	0.963185
8	23	20	16	29	8	29	0	7	72	8	0	28	72	23	0	13	72	20	0	16	72	16	0	20	72	0.805556	1	0.892308	0.222222	1	0.363636	0.638889	1	0.779661	0.555556	1	0.714286	0.444444	1	0.615385		0.861111	0.883456	0.867732	0.233333	1	0.374652	0.586111	0.963599
9	23	20	30	34	13	33	1	3	71	13	0	23	72	23	0	13	72	20	0	16	72	29	1	7	71	0.916667	0.970588	0.942857	0.361111	1	0.530612	0.638889	1	0.779661	0.555556	1	0.714286	0.805556	0.966667	0.878788		0.894444	0.870692	0.880424	0.305556	1	0.465201	0.616667	0.965184
10	23	20	30	34	13	33	1	3	71	13	0	23	72	23	0	13	72	20	0	16	72	29	1	7	71	0.916667	0.970588	0.942857	0.361111	1	0.530612	0.638889	1	0.779661	0.555556	1	0.714286	0.805556	0.966667	0.878788		0.916667	0.866355	0.889581	0.355556	1	0.524245	0.638889	0.967
																										Union			Intersect			KEGG			GO			OMIM
n	KEGG	GO	OMIM	Union	Intersect	TP	FP	FN	TN	TP	FP	FN	TN	TP	FP	FN	TN	TP	FP	FN	TN	TP	FP	FN	TN	Sensitivity	Precision	F-score	Sensitivity	Precision	F-score	Sensitivity	Precision	F-score	Sensitivity	Precision	F-score	Sensitivity	Precision	F-score		Stdev (S)	Stdev (P)	Stdev (F)	Stdev (S)	Stdev (P)	Stdev (F)	Stdev (S)	Stdev (P)
1	11	19	4	24	2	23	1	13	71	2	0	34	72	11	0	25	72	18	1	18	71	4	0	32	72	0.638889	0.958333	0.766667	0.0555556	1	0.105263	0.305556	1	0.468085	0.5	0.947368	0.654545	0.111111	1	0.2		1.17028e-16	0.0366596	0.0119064	1.46285e-17	0	0	5.85139e-17	0.0263523
2	14	19	6	26	3	25	1	11	71	3	0	33	72	14	0	22	72	18	1	18	71	6	0	30	72	0.694444	0.961538	0.806452	0.0833333	1	0.153846	0.388889	1	0.56	0.5	0.947368	0.654545	0.166667	1	0.285714		1.17028e-16	0.0340113	0.0121246	1.46285e-17	0	2.92569e-17	0	0.0210819
3	17	19	9	29	3	28	1	8	71	3	0	33	72	17	0	19	72	18	1	18	71	9	0	27	72	0.777778	0.965517	0.861538	0.0833333	1	0.153846	0.472222	1	0.641509	0.5	0.947368	0.654545	0.25	1	0.4		0	0.0375177	0.0151626	1.46285e-17	0	2.92569e-17	0	0.0175682
4	18	19	9	29	3	28	1	8	71	3	0	33	72	18	0	18	72	18	1	18	71	9	0	27	72	0.777778	0.965517	0.861538	0.0833333	1	0.153846	0.5	1	0.666667	0.5	0.947368	0.654545	0.25	1	0.4		0	0.0375177	0.0151626	1.46285e-17	0	2.92569e-17	0	0.0166436
5	19	19	12	29	3	28	1	8	71	3	0	33	72	19	0	17	72	18	1	18	71	12	0	24	72	0.777778	0.965517	0.861538	0.0833333	1	0.153846	0.527778	1	0.690909	0.5	0.947368	0.654545	0.333333	1	0.5		0	0.0380789	0.0153677	0.0087841	0	0.0145951	0	0.0158114
6	22	19	13	30	5	28	2	8	70	5	0	31	72	21	1	15	71	18	1	18	71	13	0	23	72	0.777778	0.933333	0.848485	0.138889	1	0.243902	0.583333	0.954545	0.724138	0.5	0.947368	0.654545	0.361111	1	0.530612		0	0.040048	0.0162536	0.0263523	0	0.0427585	0.0243221	0.0227607
7	22	19	15	31	6	29	2	7	70	6	0	30	72	21	1	15	71	18	1	18	71	15	0	21	72	0.805556	0.935484	0.865672	0.166667	1	0.285714	0.583333	0.954545	0.724138	0.5	0.947368	0.654545	0.416667	1	0.588235		0.0087841	0.0426148	0.0209339	0.034645	0	0.0535279	0.0236066	0.0289368
8	22	21	16	31	7	29	2	7	70	7	0	29	72	21	1	15	71	20	1	16	71	16	0	20	72	0.805556	0.935484	0.865672	0.194444	1	0.325581	0.583333	0.954545	0.724138	0.555556	0.952381	0.701754	0.444444	1	0.615385		0.0585607	0.0793541	0.0226137	0.0616975	0	0.0829533	0.027623	0.0287943
9	24	21	31	36	13	33	3	3	69	13	0	23	72	23	1	13	71	20	1	16	71	29	2	7	70	0.916667	0.916667	0.916667	0.361111	1	0.530612	0.638889	0.958333	0.766667	0.555556	0.952381	0.701754	0.805556	0.935484	0.865672		0.0468486	0.0654569	0.0383107	0.0585607	0	0.0714988	0.025526	0.0275386
10	24	21	31	36	13	33	3	3	69	13	0	23	72	23	1	13	71	20	1	16	71	29	2	7	70	0.916667	0.916667	0.916667	0.361111	1	0.530612	0.638889	0.958333	0.766667	0.555556	0.952381	0.701754	0.805556	0.935484	0.865672		0	0.0676961	0.0357236	0.0219114	0	0.0237353	1.17028e-16	0.0256616
																										Union			Intersect			KEGG			GO			OMIM				# Average of 10 repeats
n	KEGG	GO	OMIM	Union	Intersect	TP	FP	FN	TN	TP	FP	FN	TN	TP	FP	FN	TN	TP	FP	FN	TN	TP	FP	FN	TN	Sensitivity	Precision	F-score	Sensitivity	Precision	F-score	Sensitivity	Precision	F-score	Sensitivity	Precision	F-score	Sensitivity	Precision	F-score
1	11	19	4	24	2	23	1	13	71	2	0	34	72	11	0	25	72	18	1	18	71	4	0	32	72	0.638889	0.958333	0.766667	0.0555556	1	0.105263	0.305556	1	0.468085	0.5	0.947368	0.654545	0.111111	1	0.2
2	14	19	6	26	3	25	1	11	71	3	0	33	72	14	0	22	72	18	1	18	71	6	0	30	72	0.694444	0.961538	0.806452	0.0833333	1	0.153846	0.388889	1	0.56	0.5	0.947368	0.654545	0.166667	1	0.285714
3	17	21	9	30	3	28	2	8	70	3	0	33	72	17	0	19	72	19	2	17	70	9	0	27	72	0.777778	0.933333	0.848485	0.0833333	1	0.153846	0.472222	1	0.641509	0.527778	0.904762	0.666667	0.25	1	0.4
4	18	21	9	30	3	28	2	8	70	3	0	33	72	18	0	18	72	19	2	17	70	9	0	27	72	0.777778	0.933333	0.848485	0.0833333	1	0.153846	0.5	1	0.666667	0.527778	0.904762	0.666667	0.25	1	0.4
5	19	21	10	30	4	28	2	8	70	4	0	32	72	19	0	17	72	19	2	17	70	10	0	26	72	0.777778	0.933333	0.848485	0.111111	1	0.2	0.527778	1	0.690909	0.527778	0.904762	0.666667	0.277778	1	0.434783
6	21	21	13	31	4	28	3	8	69	4	0	32	72	20	1	16	71	19	2	17	70	13	0	23	72	0.777778	0.903226	0.835821	0.111111	1	0.2	0.555556	0.952381	0.701754	0.527778	0.904762	0.666667	0.361111	1	0.530612
7	21	21	15	32	5	29	3	7	69	5	0	31	72	20	1	16	71	19	2	17	70	15	0	21	72	0.805556	0.90625	0.852941	0.138889	1	0.243902	0.555556	0.952381	0.701754	0.527778	0.904762	0.666667	0.416667	1	0.588235
8	23	21	16	32	8	29	3	7	69	8	0	28	72	22	1	14	71	19	2	17	70	16	0	20	72	0.805556	0.90625	0.852941	0.222222	1	0.363636	0.611111	0.956522	0.745763	0.527778	0.904762	0.666667	0.444444	1	0.615385
9	23	23	16	32	8	29	3	7	69	8	0	28	72	22	1	14	71	21	2	15	70	16	0	20	72	0.805556	0.90625	0.852941	0.222222	1	0.363636	0.611111	0.956522	0.745763	0.583333	0.913043	0.711864	0.444444	1	0.615385
10	24	23	29	36	14	33	3	3	69	14	0	22	72	23	1	13	71	21	2	15	70	29	0	7	72	0.916667	0.916667	0.916667	0.388889	1	0.56	0.638889	0.958333	0.766667	0.583333	0.913043	0.711864	0.805556	1	0.892308
																										Union			Intersect			KEGG			GO			OMIM
n	KEGG	GO	OMIM	Union	Intersect	TP	FP	FN	TN	TP	FP	FN	TN	TP	FP	FN	TN	TP	FP	FN	TN	TP	FP	FN	TN	Sensitivity	Precision	F-score	Sensitivity	Precision	F-score	Sensitivity	Precision	F-score	Sensitivity	Precision	F-score	Sensitivity	Precision	F-score
1	11	18	4	23	2	23	0	13	72	2	0	34	72	11	0	25	72	18	0	18	72	4	0	32	72	0.638889	1	0.779661	0.0555556	1	0.105263	0.305556	1	0.468085	0.5	1	0.666667	0.111111	1	0.2
2	14	18	6	25	3	25	0	11	72	3	0	33	72	14	0	22	72	18	0	18	72	6	0	30	72	0.694444	1	0.819672	0.0833333	1	0.153846	0.388889	1	0.56	0.5	1	0.666667	0.166667	1	0.285714
3	17	18	9	28	3	28	0	8	72	3	0	33	72	17	0	19	72	18	0	18	72	9	0	27	72	0.777778	1	0.875	0.0833333	1	0.153846	0.472222	1	0.641509	0.5	1	0.666667	0.25	1	0.4
4	18	18	9	28	3	28	0	8	72	3	0	33	72	18	0	18	72	18	0	18	72	9	0	27	72	0.777778	1	0.875	0.0833333	1	0.153846	0.5	1	0.666667	0.5	1	0.666667	0.25	1	0.4
5	19	18	12	28	3	28	0	8	72	3	0	33	72	19	0	17	72	18	0	18	72	12	0	24	72	0.777778	1	0.875	0.0833333	1	0.153846	0.527778	1	0.690909	0.5	1	0.666667	0.333333	1	0.5
6	19	18	13	28	3	28	0	8	72	3	0	33	72	19	0	17	72	18	0	18	72	13	0	23	72	0.777778	1	0.875	0.0833333	1	0.153846	0.527778	1	0.690909	0.5	1	0.666667	0.361111	1	0.530612
7	21	18	15	29	6	29	0	7	72	6	0	30	72	21	0	15	72	18	0	18	72	15	0	21	72	0.805556	1	0.892308	0.166667	1	0.285714	0.583333	1	0.736842	0.5	1	0.666667	0.416667	1	0.588235
8	21	20	16	29	7	29	0	7	72	7	0	29	72	21	0	15	72	20	0	16	72	16	0	20	72	0.805556	1	0.892308	0.194444	1	0.325581	0.583333	1	0.736842	0.555556	1	0.714286	0.444444	1	0.615385
9	23	20	31	35	13	33	2	3	70	13	0	23	72	23	0	13	72	20	0	16	72	29	2	7	70	0.916667	0.942857	0.929577	0.361111	1	0.530612	0.638889	1	0.779661	0.555556	1	0.714286	0.805556	0.935484	0.865672
10	23	20	31	35	13	33	2	3	70	13	0	23	72	23	0	13	72	20	0	16	72	29	2	7	70	0.916667	0.942857	0.929577	0.361111	1	0.530612	0.638889	1	0.779661	0.555556	1	0.714286	0.805556	0.935484	0.865672
																										Union			Intersect			KEGG			GO			OMIM
n	KEGG	GO	OMIM	Union	Intersect	TP	FP	FN	TN	TP	FP	FN	TN	TP	FP	FN	TN	TP	FP	FN	TN	TP	FP	FN	TN	Sensitivity	Precision	F-score	Sensitivity	Precision	F-score	Sensitivity	Precision	F-score	Sensitivity	Precision	F-score	Sensitivity	Precision	F-score
1	11	19	4	24	2	23	1	13	71	2	0	34	72	11	0	25	72	18	1	18	71	4	0	32	72	0.638889	0.958333	0.766667	0.0555556	1	0.105263	0.305556	1	0.468085	0.5	0.947368	0.654545	0.111111	1	0.2
2	14	19	6	26	3	25	1	11	71	3	0	33	72	14	0	22	72	18	1	18	71	6	0	30	72	0.694444	0.961538	0.806452	0.0833333	1	0.153846	0.388889	1	0.56	0.5	0.947368	0.654545	0.166667	1	0.285714
3	17	20	9	29	3	28	1	8	71	3	0	33	72	17	0	19	72	19	1	17	71	9	0	27	72	0.777778	0.965517	0.861538	0.0833333	1	0.153846	0.472222	1	0.641509	0.527778	0.95	0.678571	0.25	1	0.4
4	18	20	9	29	3	28	1	8	71	3	0	33	72	18	0	18	72	19	1	17	71	9	0	27	72	0.777778	0.965517	0.861538	0.0833333	1	0.153846	0.5	1	0.666667	0.527778	0.95	0.678571	0.25	1	0.4
5	19	21	12	30	3	28	2	8	70	3	0	33	72	19	0	17	72	19	2	17	70	12	0	24	72	0.777778	0.933333	0.848485	0.0833333	1	0.153846	0.527778	1	0.690909	0.527778	0.904762	0.666667	0.333333	1	0.5
6	21	21	13	31	3	28	3	8	69	3	0	33	72	20	1	16	71	19	2	17	70	13	0	23	72	0.777778	0.903226	0.835821	0.0833333	1	0.153846	0.555556	0.952381	0.701754	0.527778	0.904762	0.666667	0.361111	1	0.530612
7	21	21	15	32	4	29	3	7	69	4	0	32	72	20	1	16	71	19	2	17	70	15	0	21	72	0.805556	0.90625	0.852941	0.111111	1	0.2	0.555556	0.952381	0.701754	0.527778	0.904762	0.666667	0.416667	1	0.588235
8	21	21	34	41	9	33	8	3	64	9	0	27	72	20	1	16	71	19	2	17	70	28	6	8	66	0.916667	0.804878	0.857143	0.25	1	0.4	0.555556	0.952381	0.701754	0.527778	0.904762	0.666667	0.777778	0.823529	0.8
9	22	21	34	41	10	33	8	3	64	10	0	26	72	21	1	15	71	19	2	17	70	28	6	8	66	0.916667	0.804878	0.857143	0.277778	1	0.434783	0.583333	0.954545	0.724138	0.527778	0.904762	0.666667	0.777778	0.823529	0.8
10	24	21	34	41	12	33	8	3	64	12	0	24	72	23	1	13	71	19	2	17	70	28	6	8	66	0.916667	0.804878	0.857143	0.333333	1	0.5	0.638889	0.958333	0.766667	0.527778	0.904762	0.666667	0.777778	0.823529	0.8
																										Union			Intersect			KEGG			GO			OMIM
n	KEGG	GO	OMIM	Union	Intersect	TP	FP	FN	TN	TP	FP	FN	TN	TP	FP	FN	TN	TP	FP	FN	TN	TP	FP	FN	TN	Sensitivity	Precision	F-score	Sensitivity	Precision	F-score	Sensitivity	Precision	F-score	Sensitivity	Precision	F-score	Sensitivity	Precision	F-score
1	11	19	4	24	2	23	1	13	71	2	0	34	72	11	0	25	72	18	1	18	71	4	0	32	72	0.638889	0.958333	0.766667	0.0555556	1	0.105263	0.305556	1	0.468085	0.5	0.947368	0.654545	0.111111	1	0.2
2	14	19	6	26	3	25	1	11	71	3	0	33	72	14	0	22	72	18	1	18	71	6	0	30	72	0.694444	0.961538	0.806452	0.0833333	1	0.153846	0.388889	1	0.56	0.5	0.947368	0.654545	0.166667	1	0.285714
3	17	22	9	30	3	28	2	8	70	3	0	33	72	17	0	19	72	20	2	16	70	9	0	27	72	0.777778	0.933333	0.848485	0.0833333	1	0.153846	0.472222	1	0.641509	0.555556	0.909091	0.689655	0.25	1	0.4
4	18	22	9	30	3	28	2	8	70	3	0	33	72	18	0	18	72	20	2	16	70	9	0	27	72	0.777778	0.933333	0.848485	0.0833333	1	0.153846	0.5	1	0.666667	0.555556	0.909091	0.689655	0.25	1	0.4
5	19	22	12	30	3	28	2	8	70	3	0	33	72	19	0	17	72	20	2	16	70	12	0	24	72	0.777778	0.933333	0.848485	0.0833333	1	0.153846	0.527778	1	0.690909	0.555556	0.909091	0.689655	0.333333	1	0.5
6	20	22	14	31	3	28	3	8	69	3	0	33	72	19	1	17	71	20	2	16	70	13	1	23	71	0.777778	0.903226	0.835821	0.0833333	1	0.153846	0.527778	0.95	0.678571	0.555556	0.909091	0.689655	0.361111	0.928571	0.52
7	22	22	14	32	3	28	4	8	68	3	0	33	72	20	2	16	70	20	2	16	70	13	1	23	71	0.777778	0.875	0.823529	0.0833333	1	0.153846	0.555556	0.909091	0.689655	0.555556	0.909091	0.689655	0.361111	0.928571	0.52
8	22	22	16	33	4	29	4	7	68	4	0	32	72	20	2	16	70	20	2	16	70	15	1	21	71	0.805556	0.878788	0.84058	0.111111	1	0.2	0.555556	0.909091	0.689655	0.555556	0.909091	0.689655	0.416667	0.9375	0.576923
9	23	23	17	33	7	29	4	7	68	7	0	29	72	21	2	15	70	21	2	15	70	16	1	20	71	0.805556	0.878788	0.84058	0.194444	1	0.325581	0.583333	0.913043	0.711864	0.583333	0.913043	0.711864	0.444444	0.941176	0.603774
10	25	23	33	40	14	33	7	3	65	14	0	22	72	23	2	13	70	21	2	15	70	29	4	7	68	0.916667	0.825	0.868421	0.388889	1	0.56	0.638889	0.92	0.754098	0.583333	0.913043	0.711864	0.805556	0.878788	0.84058
																										Union			Intersect			KEGG			GO			OMIM
n	KEGG	GO	OMIM	Union	Intersect	TP	FP	FN	TN	TP	FP	FN	TN	TP	FP	FN	TN	TP	FP	FN	TN	TP	FP	FN	TN	Sensitivity	Precision	F-score	Sensitivity	Precision	F-score	Sensitivity	Precision	F-score	Sensitivity	Precision	F-score	Sensitivity	Precision	F-score
1	12	19	5	25	2	23	2	13	70	2	0	34	72	11	1	25	71	18	1	18	71	4	1	32	71	0.638889	0.92	0.754098	0.0555556	1	0.105263	0.305556	0.916667	0.458333	0.5	0.947368	0.654545	0.111111	0.8	0.195122
2	15	19	7	27	3	25	2	11	70	3	0	33	72	14	1	22	71	18	1	18	71	6	1	30	71	0.694444	0.925926	0.793651	0.0833333	1	0.153846	0.388889	0.933333	0.54902	0.5	0.947368	0.654545	0.166667	0.857143	0.27907
3	18	22	10	31	3	28	3	8	69	3	0	33	72	17	1	19	71	20	2	16	70	9	1	27	71	0.777778	0.903226	0.835821	0.0833333	1	0.153846	0.472222	0.944444	0.62963	0.555556	0.909091	0.689655	0.25	0.9	0.391304
4	19	22	10	31	3	28	3	8	69	3	0	33	72	18	1	18	71	20	2	16	70	9	1	27	71	0.777778	0.903226	0.835821	0.0833333	1	0.153846	0.5	0.947368	0.654545	0.555556	0.909091	0.689655	0.25	0.9	0.391304
5	20	22	11	31	3	28	3	8	69	3	0	33	72	19	1	17	71	20	2	16	70	10	1	26	71	0.777778	0.903226	0.835821	0.0833333	1	0.153846	0.527778	0.95	0.678571	0.555556	0.909091	0.689655	0.277778	0.909091	0.425532
6	22	22	14	31	5	28	3	8	69	5	0	31	72	21	1	15	71	20	2	16	70	13	1	23	71	0.777778	0.903226	0.835821	0.138889	1	0.243902	0.583333	0.954545	0.724138	0.555556	0.909091	0.689655	0.361111	0.928571	0.52
7	23	22	16	32	7	29	3	7	69	7	0	29	72	22	1	14	71	20	2	16	70	15	1	21	71	0.805556	0.90625	0.852941	0.194444	1	0.325581	0.611111	0.956522	0.745763	0.555556	0.909091	0.689655	0.416667	0.9375	0.576923
8	23	22	36	43	12	33	10	3	62	12	0	24	72	22	1	14	71	20	2	16	70	28	8	8	64	0.916667	0.767442	0.835443	0.333333	1	0.5	0.611111	0.956522	0.745763	0.555556	0.909091	0.689655	0.777778	0.777778	0.777778
9	23	22	36	43	12	33	10	3	62	12	0	24	72	22	1	14	71	20	2	16	70	28	8	8	64	0.916667	0.767442	0.835443	0.333333	1	0.5	0.611111	0.956522	0.745763	0.555556	0.909091	0.689655	0.777778	0.777778	0.777778
10	24	22	36	43	12	33	10	3	62	12	0	24	72	23	1	13	71	20	2	16	70	28	8	8	64	0.916667	0.767442	0.835443	0.333333	1	0.5	0.638889	0.958333	0.766667	0.555556	0.909091	0.689655	0.777778	0.777778	0.777778
																										Union			Intersect			KEGG			GO			OMIM
n	KEGG	GO	OMIM	Union	Intersect	TP	FP	FN	TN	TP	FP	FN	TN	TP	FP	FN	TN	TP	FP	FN	TN	TP	FP	FN	TN	Sensitivity	Precision	F-score	Sensitivity	Precision	F-score	Sensitivity	Precision	F-score	Sensitivity	Precision	F-score	Sensitivity	Precision	F-score
1	11	19	4	24	2	23	1	13	71	2	0	34	72	11	0	25	72	18	1	18	71	4	0	32	72	0.638889	0.958333	0.766667	0.0555556	1	0.105263	0.305556	1	0.468085	0.5	0.947368	0.654545	0.111111	1	0.2
2	14	19	6	26	3	25	1	11	71	3	0	33	72	14	0	22	72	18	1	18	71	6	0	30	72	0.694444	0.961538	0.806452	0.0833333	1	0.153846	0.388889	1	0.56	0.5	0.947368	0.654545	0.166667	1	0.285714
3	17	19	9	29	3	28	1	8	71	3	0	33	72	17	0	19	72	18	1	18	71	9	0	27	72	0.777778	0.965517	0.861538	0.0833333	1	0.153846	0.472222	1	0.641509	0.5	0.947368	0.654545	0.25	1	0.4
4	18	19	9	29	3	28	1	8	71	3	0	33	72	18	0	18	72	18	1	18	71	9	0	27	72	0.777778	0.965517	0.861538	0.0833333	1	0.153846	0.5	1	0.666667	0.5	0.947368	0.654545	0.25	1	0.4
5	19	19	12	29	3	28	1	8	71	3	0	33	72	19	0	17	72	18	1	18	71	12	0	24	72	0.777778	0.965517	0.861538	0.0833333	1	0.153846	0.527778	1	0.690909	0.5	0.947368	0.654545	0.333333	1	0.5
6	21	21	13	30	3	28	2	8	70	3	0	33	72	20	1	16	71	20	1	16	71	13	0	23	72	0.777778	0.933333	0.848485	0.0833333	1	0.153846	0.555556	0.952381	0.701754	0.555556	0.952381	0.701754	0.361111	1	0.530612
7	21	21	15	31	4	29	2	7	70	4	0	32	72	20	1	16	71	20	1	16	71	15	0	21	72	0.805556	0.935484	0.865672	0.111111	1	0.2	0.555556	0.952381	0.701754	0.555556	0.952381	0.701754	0.416667	1	0.588235
8	21	21	31	38	9	33	5	3	67	9	0	27	72	20	1	16	71	20	1	16	71	28	3	8	69	0.916667	0.868421	0.891892	0.25	1	0.4	0.555556	0.952381	0.701754	0.555556	0.952381	0.701754	0.777778	0.903226	0.835821
9	22	24	31	39	11	33	6	3	66	11	0	25	72	21	1	15	71	22	2	14	70	28	3	8	69	0.916667	0.846154	0.88	0.305556	1	0.468085	0.583333	0.954545	0.724138	0.611111	0.916667	0.733333	0.777778	0.903226	0.835821
10	24	24	31	39	13	33	6	3	66	13	0	23	72	23	1	13	71	22	2	14	70	28	3	8	69	0.916667	0.846154	0.88	0.361111	1	0.530612	0.638889	0.958333	0.766667	0.611111	0.916667	0.733333	0.777778	0.903226	0.835821
																										Union			Intersect			KEGG			GO			OMIM
n	KEGG	GO	OMIM	Union	Intersect	TP	FP	FN	TN	TP	FP	FN	TN	TP	FP	FN	TN	TP	FP	FN	TN	TP	FP	FN	TN	Sensitivity	Precision	F-score	Sensitivity	Precision	F-score	Sensitivity	Precision	F-score	Sensitivity	Precision	F-score	Sensitivity	Precision	F-score
1	11	20	5	26	2	23	3	13	69	2	0	34	72	11	0	25	72	18	2	18	70	4	1	32	71	0.638889	0.884615	0.741935	0.0555556	1	0.105263	0.305556	1	0.468085	0.5	0.9	0.642857	0.111111	0.8	0.195122
2	14	20	7	28	3	25	3	11	69	3	0	33	72	14	0	22	72	18	2	18	70	6	1	30	71	0.694444	0.892857	0.78125	0.0833333	1	0.153846	0.388889	1	0.56	0.5	0.9	0.642857	0.166667	0.857143	0.27907
3	17	20	10	31	3	28	3	8	69	3	0	33	72	17	0	19	72	18	2	18	70	9	1	27	71	0.777778	0.903226	0.835821	0.0833333	1	0.153846	0.472222	1	0.641509	0.5	0.9	0.642857	0.25	0.9	0.391304
4	18	20	10	31	3	28	3	8	69	3	0	33	72	18	0	18	72	18	2	18	70	9	1	27	71	0.777778	0.903226	0.835821	0.0833333	1	0.153846	0.5	1	0.666667	0.5	0.9	0.642857	0.25	0.9	0.391304
5	19	20	13	31	3	28	3	8	69	3	0	33	72	19	0	17	72	18	2	18	70	12	1	24	71	0.777778	0.903226	0.835821	0.0833333	1	0.153846	0.527778	1	0.690909	0.5	0.9	0.642857	0.333333	0.923077	0.489796
6	19	20	14	31	3	28	3	8	69	3	0	33	72	19	0	17	72	18	2	18	70	13	1	23	71	0.777778	0.903226	0.835821	0.0833333	1	0.153846	0.527778	1	0.690909	0.5	0.9	0.642857	0.361111	0.928571	0.52
7	19	20	16	32	4	29	3	7	69	4	0	32	72	19	0	17	72	18	2	18	70	15	1	21	71	0.805556	0.90625	0.852941	0.111111	1	0.2	0.527778	1	0.690909	0.5	0.9	0.642857	0.416667	0.9375	0.576923
8	21	20	35	41	9	33	8	3	64	9	0	27	72	21	0	15	72	18	2	18	70	28	7	8	65	0.916667	0.804878	0.857143	0.25	1	0.4	0.583333	1	0.736842	0.5	0.9	0.642857	0.777778	0.8	0.788732
9	23	20	35	41	11	33	8	3	64	11	0	25	72	23	0	13	72	18	2	18	70	28	7	8	65	0.916667	0.804878	0.857143	0.305556	1	0.468085	0.638889	1	0.779661	0.5	0.9	0.642857	0.777778	0.8	0.788732
10	23	22	35	41	12	33	8	3	64	12	0	24	72	23	0	13	72	20	2	16	70	28	7	8	65	0.916667	0.804878	0.857143	0.333333	1	0.5	0.638889	1	0.779661	0.555556	0.909091	0.689655	0.777778	0.8	0.788732
																										Union			Intersect			KEGG			GO			OMIM
n	KEGG	GO	OMIM	Union	Intersect	TP	FP	FN	TN	TP	FP	FN	TN	TP	FP	FN	TN	TP	FP	FN	TN	TP	FP	FN	TN	Sensitivity	Precision	F-score	Sensitivity	Precision	F-score	Sensitivity	Precision	F-score	Sensitivity	Precision	F-score	Sensitivity	Precision	F-score
1	11	18	4	23	2	23	0	13	72	2	0	34	72	11	0	25	72	18	0	18	72	4	0	32	72	0.638889	1	0.779661	0.0555556	1	0.105263	0.305556	1	0.468085	0.5	1	0.666667	0.111111	1	0.2
2	14	18	6	25	3	25	0	11	72	3	0	33	72	14	0	22	72	18	0	18	72	6	0	30	72	0.694444	1	0.819672	0.0833333	1	0.153846	0.388889	1	0.56	0.5	1	0.666667	0.166667	1	0.285714
3	17	18	9	28	3	28	0	8	72	3	0	33	72	17	0	19	72	18	0	18	72	9	0	27	72	0.777778	1	0.875	0.0833333	1	0.153846	0.472222	1	0.641509	0.5	1	0.666667	0.25	1	0.4
4	18	18	9	28	3	28	0	8	72	3	0	33	72	18	0	18	72	18	0	18	72	9	0	27	72	0.777778	1	0.875	0.0833333	1	0.153846	0.5	1	0.666667	0.5	1	0.666667	0.25	1	0.4
5	19	18	12	28	3	28	0	8	72	3	0	33	72	19	0	17	72	18	0	18	72	12	0	24	72	0.777778	1	0.875	0.0833333	1	0.153846	0.527778	1	0.690909	0.5	1	0.666667	0.333333	1	0.5
6	22	20	13	29	5	28	1	8	71	5	0	31	72	21	1	15	71	20	0	16	72	13	0	23	72	0.777778	0.965517	0.861538	0.138889	1	0.243902	0.583333	0.954545	0.724138	0.555556	1	0.714286	0.361111	1	0.530612
7	22	20	15	30	6	29	1	7	71	6	0	30	72	21	1	15	71	20	0	16	72	15	0	21	72	0.805556	0.966667	0.878788	0.166667	1	0.285714	0.583333	0.954545	0.724138	0.555556	1	0.714286	0.416667	1	0.588235
8	22	20	33	38	11	33	5	3	67	11	0	25	72	21	1	15	71	20	0	16	72	28	5	8	67	0.916667	0.868421	0.891892	0.305556	1	0.468085	0.583333	0.954545	0.724138	0.555556	1	0.714286	0.777778	0.848485	0.811594
9	24	21	33	38	12	33	5	3	67	12	0	24	72	23	1	13	71	21	0	15	72	28	5	8	67	0.916667	0.868421	0.891892	0.333333	1	0.5	0.638889	0.958333	0.766667	0.583333	1	0.736842	0.777778	0.848485	0.811594
10	24	21	33	38	12	33	5	3	67	12	0	24	72	23	1	13	71	21	0	15	72	28	5	8	67	0.916667	0.868421	0.891892	0.333333	1	0.5	0.638889	0.958333	0.766667	0.583333	1	0.736842	0.777778	0.848485	0.811594
[truncated: 7 more columns]

## Sheet: hych
Test1						Union				Intersect				KEGG				GO				OMIM				Union			Intersect			KEGG			GO			OMIM				Union			Intersect			KEGG
n	KEGG	GO	OMIM	Union	Intersect	TP	FP	FN	TN	TP	FP	FN	TN	TP	FP	FN	TN	TP	FP	FN	TN	TP	FP	FN	TN	Sensitivity	Precision	F-score	Sensitivity	Precision	F-score	Sensitivity	Precision	F-score	Sensitivity	Precision	F-score	Sensitivity	Precision	F-score		Sensitivity (S)	Precision (P)	F-score (F)	Sensitivity (S)	Precision (P)	F-score (F)	Sensitivity (S)	Precision (P)
1	6	15	3	17	0	17	0	15	64	0	0	32	64	6	0	26	64	15	0	17	64	3	0	29	64	0.53125	1	0.693878	0	N/A	N/A	0.1875	1	0.315789	0.46875	1	0.638298	0.09375	1	0.171429		0.515625	0.994118	0.678912	0.015625	1	0.0606061	0.1875	0.985714
2	10	15	6	21	1	21	0	11	64	1	0	31	64	10	0	22	64	15	0	17	64	6	0	26	64	0.65625	1	0.792453	0.03125	1	0.0606061	0.3125	1	0.47619	0.46875	1	0.638298	0.1875	1	0.315789		0.646875	0.991304	0.782605	0.03125	1	0.0606061	0.31875	0.984615
3	11	15	6	22	1	22	0	10	64	1	0	31	64	11	0	21	64	15	0	17	64	6	0	26	64	0.6875	1	0.814815	0.03125	1	0.0606061	0.34375	1	0.511628	0.46875	1	0.638298	0.1875	1	0.315789		0.690625	0.991667	0.81406	0.03125	1	0.0606061	0.346875	0.984615
4	12	18	10	28	1	25	3	7	61	1	0	31	64	12	0	20	64	16	2	16	62	9	1	23	63	0.78125	0.892857	0.833333	0.03125	1	0.0606061	0.375	1	0.545455	0.5	0.888889	0.64	0.28125	0.9	0.428571		0.78125	0.978032	0.868321	0.03125	1	0.0606061	0.375	0.985714
5	12	18	10	28	1	25	3	7	61	1	0	31	64	12	0	20	64	16	2	16	62	9	1	23	63	0.78125	0.892857	0.833333	0.03125	1	0.0606061	0.375	1	0.545455	0.5	0.888889	0.64	0.28125	0.9	0.428571		0.865625	0.897316	0.880737	0.0875	1	0.160346	0.375	0.985714
6	16	18	24	33	6	28	5	4	59	6	0	26	64	16	0	16	64	16	2	16	62	21	3	11	61	0.875	0.848485	0.861538	0.1875	1	0.315789	0.5	1	0.666667	0.5	0.888889	0.64	0.65625	0.875	0.75		0.875	0.892879	0.883557	0.1875	1	0.315789	0.5	0.988889
7	16	18	24	33	6	28	5	4	59	6	0	26	64	16	0	16	64	16	2	16	62	21	3	11	61	0.875	0.848485	0.861538	0.1875	1	0.315789	0.5	1	0.666667	0.5	0.888889	0.64	0.65625	0.875	0.75		0.875	0.892879	0.883557	0.1875	1	0.315789	0.5	0.988889
8	17	18	24	33	6	28	5	4	59	6	0	26	64	17	0	15	64	16	2	16	62	21	3	11	61	0.875	0.848485	0.861538	0.1875	1	0.315789	0.53125	1	0.693878	0.5	0.888889	0.64	0.65625	0.875	0.75		0.875	0.88508	0.87956	0.1875	1	0.315789	0.53125	0.974211
9	17	18	24	33	6	28	5	4	59	6	0	26	64	17	0	15	64	16	2	16	62	21	3	11	61	0.875	0.848485	0.861538	0.1875	1	0.315789	0.53125	1	0.693878	0.5	0.888889	0.64	0.65625	0.875	0.75		0.875	0.882429	0.878214	0.1875	1	0.315789	0.5375	0.964365
10	17	18	24	33	6	28	5	4	59	6	0	26	64	17	0	15	64	16	2	16	62	21	3	11	61	0.875	0.848485	0.861538	0.1875	1	0.315789	0.53125	1	0.693878	0.5	0.888889	0.64	0.65625	0.875	0.75		0.878125	0.872468	0.874587	0.19375	1	0.324211	0.55625	0.949719
																										Union			Intersect			KEGG			GO			OMIM
n	KEGG	GO	OMIM	Union	Intersect	TP	FP	FN	TN	TP	FP	FN	TN	TP	FP	FN	TN	TP	FP	FN	TN	TP	FP	FN	TN	Sensitivity	Precision	F-score	Sensitivity	Precision	F-score	Sensitivity	Precision	F-score	Sensitivity	Precision	F-score	Sensitivity	Precision	F-score		Stdev (S)	Stdev (P)	Stdev (F)	Stdev (S)	Stdev (P)	Stdev (F)	Stdev (S)	Stdev (P)
1	6	15	4	16	1	16	0	16	64	1	0	31	64	6	0	26	64	15	0	17	64	4	0	28	64	0.5	1	0.666667	0.03125	1	0.0606061	0.1875	1	0.315789	0.46875	1	0.638298	0.125	1	0.222222		0.0164702	0.0186016	0.0162887	0.0164702	0	0	0	0.0451754
2	10	15	4	20	1	20	0	12	64	1	0	31	64	10	0	22	64	15	0	17	64	4	0	28	64	0.625	1	0.769231	0.03125	1	0.0606061	0.3125	1	0.47619	0.46875	1	0.638298	0.125	1	0.222222		0.0150952	0.0274981	0.0128162	0	0	1.46285e-17	0.0131762	0.0486504
3	11	15	6	22	1	22	0	10	64	1	0	31	64	11	0	21	64	15	0	17	64	6	0	26	64	0.6875	1	0.814815	0.03125	1	0.0606061	0.34375	1	0.511628	0.46875	1	0.638298	0.1875	1	0.315789		0.00988212	0.0263523	0.0120439	0	0	1.46285e-17	0.00988212	0.0486504
4	12	16	8	25	1	25	0	7	64	1	0	31	64	12	0	20	64	16	0	16	64	8	0	24	64	0.78125	1	0.877193	0.03125	1	0.0606061	0.375	1	0.545455	0.5	1	0.666667	0.25	1	0.4		0	0.0389016	0.0158096	0	0	1.46285e-17	0	0.0451754
5	12	16	24	32	3	28	4	4	60	3	0	29	64	12	0	20	64	16	0	16	64	20	4	12	60	0.875	0.875	0.875	0.09375	1	0.171429	0.375	1	0.545455	0.5	1	0.666667	0.625	0.833333	0.714286		0.0296464	0.0307831	0.0222144	0.0197642	0	0.0350452	0	0.0451754
6	16	16	24	32	6	28	4	4	60	6	0	26	64	16	0	16	64	16	0	16	64	20	4	12	60	0.875	0.875	0.875	0.1875	1	0.315789	0.5	1	0.666667	0.5	1	0.666667	0.625	0.833333	0.714286		0	0.034474	0.0166107	0	0	5.85139e-17	0	0.0351364
7	16	16	24	32	6	28	4	4	60	6	0	26	64	16	0	16	64	16	0	16	64	20	4	12	60	0.875	0.875	0.875	0.1875	1	0.315789	0.5	1	0.666667	0.5	1	0.666667	0.625	0.833333	0.714286		0	0.034474	0.0166107	0	0	5.85139e-17	0	0.0351364
8	20	16	24	34	6	28	6	4	58	6	0	26	64	18	2	14	62	16	0	16	64	20	4	12	60	0.875	0.823529	0.848485	0.1875	1	0.315789	0.5625	0.9	0.692308	0.5	1	0.666667	0.625	0.833333	0.714286		0	0.0424641	0.020795	0	0	5.85139e-17	0.0147314	0.0560553
9	21	16	24	34	6	28	6	4	58	6	0	26	64	19	2	13	62	16	0	16	64	20	4	12	60	0.875	0.823529	0.848485	0.1875	1	0.315789	0.59375	0.904762	0.716981	0.5	1	0.666667	0.625	0.833333	0.714286		0	0.0439647	0.0215451	0	0	5.85139e-17	0.0197642	0.0527517
10	21	16	24	34	6	28	6	4	58	6	0	26	64	19	2	13	62	16	0	16	64	20	4	12	60	0.875	0.823529	0.848485	0.1875	1	0.315789	0.59375	0.904762	0.716981	0.5	1	0.666667	0.625	0.833333	0.714286		0.00988212	0.0485213	0.0228407	0.0197642	0	0.0266297	0.0411425	0.0685811
																										Union			Intersect			KEGG			GO			OMIM				# Average of 10 repeats
n	KEGG	GO	OMIM	Union	Intersect	TP	FP	FN	TN	TP	FP	FN	TN	TP	FP	FN	TN	TP	FP	FN	TN	TP	FP	FN	TN	Sensitivity	Precision	F-score	Sensitivity	Precision	F-score	Sensitivity	Precision	F-score	Sensitivity	Precision	F-score	Sensitivity	Precision	F-score
1	6	15	3	17	0	17	0	15	64	0	0	32	64	6	0	26	64	15	0	17	64	3	0	29	64	0.53125	1	0.693878	0	N/A	N/A	0.1875	1	0.315789	0.46875	1	0.638298	0.09375	1	0.171429
2	10	15	6	21	1	21	0	11	64	1	0	31	64	10	0	22	64	15	0	17	64	6	0	26	64	0.65625	1	0.792453	0.03125	1	0.0606061	0.3125	1	0.47619	0.46875	1	0.638298	0.1875	1	0.315789
3	11	15	6	22	1	22	0	10	64	1	0	31	64	11	0	21	64	15	0	17	64	6	0	26	64	0.6875	1	0.814815	0.03125	1	0.0606061	0.34375	1	0.511628	0.46875	1	0.638298	0.1875	1	0.315789
4	12	16	8	25	1	25	0	7	64	1	0	31	64	12	0	20	64	16	0	16	64	8	0	24	64	0.78125	1	0.877193	0.03125	1	0.0606061	0.375	1	0.545455	0.5	1	0.666667	0.25	1	0.4
5	12	16	22	30	3	28	2	4	62	3	0	29	64	12	0	20	64	16	0	16	64	20	2	12	62	0.875	0.933333	0.903226	0.09375	1	0.171429	0.375	1	0.545455	0.5	1	0.666667	0.625	0.909091	0.740741
6	16	16	22	30	6	28	2	4	62	6	0	26	64	16	0	16	64	16	0	16	64	20	2	12	62	0.875	0.933333	0.903226	0.1875	1	0.315789	0.5	1	0.666667	0.5	1	0.666667	0.625	0.909091	0.740741
7	16	16	22	30	6	28	2	4	62	6	0	26	64	16	0	16	64	16	0	16	64	20	2	12	62	0.875	0.933333	0.903226	0.1875	1	0.315789	0.5	1	0.666667	0.5	1	0.666667	0.625	0.909091	0.740741
8	17	16	22	30	6	28	2	4	62	6	0	26	64	17	0	15	64	16	0	16	64	20	2	12	62	0.875	0.933333	0.903226	0.1875	1	0.315789	0.53125	1	0.693878	0.5	1	0.666667	0.625	0.909091	0.740741
9	17	16	22	30	6	28	2	4	62	6	0	26	64	17	0	15	64	16	0	16	64	20	2	12	62	0.875	0.933333	0.903226	0.1875	1	0.315789	0.53125	1	0.693878	0.5	1	0.666667	0.625	0.909091	0.740741
10	17	16	22	30	6	28	2	4	62	6	0	26	64	17	0	15	64	16	0	16	64	20	2	12	62	0.875	0.933333	0.903226	0.1875	1	0.315789	0.53125	1	0.693878	0.5	1	0.666667	0.625	0.909091	0.740741
																										Union			Intersect			KEGG			GO			OMIM
n	KEGG	GO	OMIM	Union	Intersect	TP	FP	FN	TN	TP	FP	FN	TN	TP	FP	FN	TN	TP	FP	FN	TN	TP	FP	FN	TN	Sensitivity	Precision	F-score	Sensitivity	Precision	F-score	Sensitivity	Precision	F-score	Sensitivity	Precision	F-score	Sensitivity	Precision	F-score
1	6	15	3	17	0	17	0	15	64	0	0	32	64	6	0	26	64	15	0	17	64	3	0	29	64	0.53125	1	0.693878	0	N/A	N/A	0.1875	1	0.315789	0.46875	1	0.638298	0.09375	1	0.171429
2	10	15	6	21	1	21	0	11	64	1	0	31	64	10	0	22	64	15	0	17	64	6	0	26	64	0.65625	1	0.792453	0.03125	1	0.0606061	0.3125	1	0.47619	0.46875	1	0.638298	0.1875	1	0.315789
3	11	15	6	22	1	22	0	10	64	1	0	31	64	11	0	21	64	15	0	17	64	6	0	26	64	0.6875	1	0.814815	0.03125	1	0.0606061	0.34375	1	0.511628	0.46875	1	0.638298	0.1875	1	0.315789
4	12	16	8	25	1	25	0	7	64	1	0	31	64	12	0	20	64	16	0	16	64	8	0	24	64	0.78125	1	0.877193	0.03125	1	0.0606061	0.375	1	0.545455	0.5	1	0.666667	0.25	1	0.4
5	12	16	23	31	3	28	3	4	61	3	0	29	64	12	0	20	64	16	0	16	64	20	3	12	61	0.875	0.903226	0.888889	0.09375	1	0.171429	0.375	1	0.545455	0.5	1	0.666667	0.625	0.869565	0.727273
6	16	16	23	31	6	28	3	4	61	6	0	26	64	16	0	16	64	16	0	16	64	20	3	12	61	0.875	0.903226	0.888889	0.1875	1	0.315789	0.5	1	0.666667	0.5	1	0.666667	0.625	0.869565	0.727273
7	16	16	23	31	6	28	3	4	61	6	0	26	64	16	0	16	64	16	0	16	64	20	3	12	61	0.875	0.903226	0.888889	0.1875	1	0.315789	0.5	1	0.666667	0.5	1	0.666667	0.625	0.869565	0.727273
8	17	16	23	31	6	28	3	4	61	6	0	26	64	17	0	15	64	16	0	16	64	20	3	12	61	0.875	0.903226	0.888889	0.1875	1	0.315789	0.53125	1	0.693878	0.5	1	0.666667	0.625	0.869565	0.727273
9	17	16	23	31	6	28	3	4	61	6	0	26	64	17	0	15	64	16	0	16	64	20	3	12	61	0.875	0.903226	0.888889	0.1875	1	0.315789	0.53125	1	0.693878	0.5	1	0.666667	0.625	0.869565	0.727273
10	17	16	23	31	6	28	3	4	61	6	0	26	64	17	0	15	64	16	0	16	64	20	3	12	61	0.875	0.903226	0.888889	0.1875	1	0.315789	0.53125	1	0.693878	0.5	1	0.666667	0.625	0.869565	0.727273
																										Union			Intersect			KEGG			GO			OMIM
n	KEGG	GO	OMIM	Union	Intersect	TP	FP	FN	TN	TP	FP	FN	TN	TP	FP	FN	TN	TP	FP	FN	TN	TP	FP	FN	TN	Sensitivity	Precision	F-score	Sensitivity	Precision	F-score	Sensitivity	Precision	F-score	Sensitivity	Precision	F-score	Sensitivity	Precision	F-score
1	6	15	3	17	0	17	0	15	64	0	0	32	64	6	0	26	64	15	0	17	64	3	0	29	64	0.53125	1	0.693878	0	N/A	N/A	0.1875	1	0.315789	0.46875	1	0.638298	0.09375	1	0.171429
2	10	15	6	21	1	21	0	11	64	1	0	31	64	10	0	22	64	15	0	17	64	6	0	26	64	0.65625	1	0.792453	0.03125	1	0.0606061	0.3125	1	0.47619	0.46875	1	0.638298	0.1875	1	0.315789
3	11	15	6	22	1	22	0	10	64	1	0	31	64	11	0	21	64	15	0	17	64	6	0	26	64	0.6875	1	0.814815	0.03125	1	0.0606061	0.34375	1	0.511628	0.46875	1	0.638298	0.1875	1	0.315789
4	12	16	8	25	1	25	0	7	64	1	0	31	64	12	0	20	64	16	0	16	64	8	0	24	64	0.78125	1	0.877193	0.03125	1	0.0606061	0.375	1	0.545455	0.5	1	0.666667	0.25	1	0.4
5	12	16	23	31	3	28	3	4	61	3	0	29	64	12	0	20	64	16	0	16	64	20	3	12	61	0.875	0.903226	0.888889	0.09375	1	0.171429	0.375	1	0.545455	0.5	1	0.666667	0.625	0.869565	0.727273
6	16	16	23	31	6	28	3	4	61	6	0	26	64	16	0	16	64	16	0	16	64	20	3	12	61	0.875	0.903226	0.888889	0.1875	1	0.315789	0.5	1	0.666667	0.5	1	0.666667	0.625	0.869565	0.727273
7	16	16	23	31	6	28	3	4	61	6	0	26	64	16	0	16	64	16	0	16	64	20	3	12	61	0.875	0.903226	0.888889	0.1875	1	0.315789	0.5	1	0.666667	0.5	1	0.666667	0.625	0.869565	0.727273
8	17	16	23	31	6	28	3	4	61	6	0	26	64	17	0	15	64	16	0	16	64	20	3	12	61	0.875	0.903226	0.888889	0.1875	1	0.315789	0.53125	1	0.693878	0.5	1	0.666667	0.625	0.869565	0.727273
9	18	16	23	31	6	28	3	4	61	6	0	26	64	17	1	15	63	16	0	16	64	20	3	12	61	0.875	0.903226	0.888889	0.1875	1	0.315789	0.53125	0.944444	0.68	0.5	1	0.666667	0.625	0.869565	0.727273
10	24	16	23	35	8	29	6	3	58	8	0	24	64	20	4	12	60	16	0	16	64	20	3	12	61	0.90625	0.828571	0.865672	0.25	1	0.4	0.625	0.833333	0.714286	0.5	1	0.666667	0.625	0.869565	0.727273
																										Union			Intersect			KEGG			GO			OMIM
n	KEGG	GO	OMIM	Union	Intersect	TP	FP	FN	TN	TP	FP	FN	TN	TP	FP	FN	TN	TP	FP	FN	TN	TP	FP	FN	TN	Sensitivity	Precision	F-score	Sensitivity	Precision	F-score	Sensitivity	Precision	F-score	Sensitivity	Precision	F-score	Sensitivity	Precision	F-score
1	6	15	4	16	1	16	0	16	64	1	0	31	64	6	0	26	64	15	0	17	64	4	0	28	64	0.5	1	0.666667	0.03125	1	0.0606061	0.1875	1	0.315789	0.46875	1	0.638298	0.125	1	0.222222
2	10	15	4	20	1	20	0	12	64	1	0	31	64	10	0	22	64	15	0	17	64	4	0	28	64	0.625	1	0.769231	0.03125	1	0.0606061	0.3125	1	0.47619	0.46875	1	0.638298	0.125	1	0.222222
3	11	15	6	22	1	22	0	10	64	1	0	31	64	11	0	21	64	15	0	17	64	6	0	26	64	0.6875	1	0.814815	0.03125	1	0.0606061	0.34375	1	0.511628	0.46875	1	0.638298	0.1875	1	0.315789
4	12	16	8	25	1	25	0	7	64	1	0	31	64	12	0	20	64	16	0	16	64	8	0	24	64	0.78125	1	0.877193	0.03125	1	0.0606061	0.375	1	0.545455	0.5	1	0.666667	0.25	1	0.4
5	12	16	24	32	3	28	4	4	60	3	0	29	64	12	0	20	64	16	0	16	64	20	4	12	60	0.875	0.875	0.875	0.09375	1	0.171429	0.375	1	0.545455	0.5	1	0.666667	0.625	0.833333	0.714286
6	16	16	24	32	6	28	4	4	60	6	0	26	64	16	0	16	64	16	0	16	64	20	4	12	60	0.875	0.875	0.875	0.1875	1	0.315789	0.5	1	0.666667	0.5	1	0.666667	0.625	0.833333	0.714286
7	16	16	24	32	6	28	4	4	60	6	0	26	64	16	0	16	64	16	0	16	64	20	4	12	60	0.875	0.875	0.875	0.1875	1	0.315789	0.5	1	0.666667	0.5	1	0.666667	0.625	0.833333	0.714286
8	17	16	24	32	6	28	4	4	60	6	0	26	64	17	0	15	64	16	0	16	64	20	4	12	60	0.875	0.875	0.875	0.1875	1	0.315789	0.53125	1	0.693878	0.5	1	0.666667	0.625	0.833333	0.714286
9	17	16	24	32	6	28	4	4	60	6	0	26	64	17	0	15	64	16	0	16	64	20	4	12	60	0.875	0.875	0.875	0.1875	1	0.315789	0.53125	1	0.693878	0.5	1	0.666667	0.625	0.833333	0.714286
10	17	16	24	32	6	28	4	4	60	6	0	26	64	17	0	15	64	16	0	16	64	20	4	12	60	0.875	0.875	0.875	0.1875	1	0.315789	0.53125	1	0.693878	0.5	1	0.666667	0.625	0.833333	0.714286
																										Union			Intersect			KEGG			GO			OMIM
n	KEGG	GO	OMIM	Union	Intersect	TP	FP	FN	TN	TP	FP	FN	TN	TP	FP	FN	TN	TP	FP	FN	TN	TP	FP	FN	TN	Sensitivity	Precision	F-score	Sensitivity	Precision	F-score	Sensitivity	Precision	F-score	Sensitivity	Precision	F-score	Sensitivity	Precision	F-score
1	6	15	4	16	1	16	0	16	64	1	0	31	64	6	0	26	64	15	0	17	64	4	0	28	64	0.5	1	0.666667	0.03125	1	0.0606061	0.1875	1	0.315789	0.46875	1	0.638298	0.125	1	0.222222
2	11	15	4	21	1	21	0	11	64	1	0	31	64	11	0	21	64	15	0	17	64	4	0	28	64	0.65625	1	0.792453	0.03125	1	0.0606061	0.34375	1	0.511628	0.46875	1	0.638298	0.125	1	0.222222
3	12	15	6	23	1	23	0	9	64	1	0	31	64	12	0	20	64	15	0	17	64	6	0	26	64	0.71875	1	0.836364	0.03125	1	0.0606061	0.375	1	0.545455	0.46875	1	0.638298	0.1875	1	0.315789
4	12	16	8	25	1	25	0	7	64	1	0	31	64	12	0	20	64	16	0	16	64	8	0	24	64	0.78125	1	0.877193	0.03125	1	0.0606061	0.375	1	0.545455	0.5	1	0.666667	0.25	1	0.4
5	12	16	24	32	3	28	4	4	60	3	0	29	64	12	0	20	64	16	0	16	64	20	4	12	60	0.875	0.875	0.875	0.09375	1	0.171429	0.375	1	0.545455	0.5	1	0.666667	0.625	0.833333	0.714286
6	16	16	24	32	6	28	4	4	60	6	0	26	64	16	0	16	64	16	0	16	64	20	4	12	60	0.875	0.875	0.875	0.1875	1	0.315789	0.5	1	0.666667	0.5	1	0.666667	0.625	0.833333	0.714286
7	16	16	24	32	6	28	4	4	60	6	0	26	64	16	0	16	64	16	0	16	64	20	4	12	60	0.875	0.875	0.875	0.1875	1	0.315789	0.5	1	0.666667	0.5	1	0.666667	0.625	0.833333	0.714286
8	17	16	24	32	6	28	4	4	60	6	0	26	64	17	0	15	64	16	0	16	64	20	4	12	60	0.875	0.875	0.875	0.1875	1	0.315789	0.53125	1	0.693878	0.5	1	0.666667	0.625	0.833333	0.714286
9	17	16	24	32	6	28	4	4	60	6	0	26	64	17	0	15	64	16	0	16	64	20	4	12	60	0.875	0.875	0.875	0.1875	1	0.315789	0.53125	1	0.693878	0.5	1	0.666667	0.625	0.833333	0.714286
10	17	16	24	32	6	28	4	4	60	6	0	26	64	17	0	15	64	16	0	16	64	20	4	12	60	0.875	0.875	0.875	0.1875	1	0.315789	0.53125	1	0.693878	0.5	1	0.666667	0.625	0.833333	0.714286
																										Union			Intersect			KEGG			GO			OMIM
n	KEGG	GO	OMIM	Union	Intersect	TP	FP	FN	TN	TP	FP	FN	TN	TP	FP	FN	TN	TP	FP	FN	TN	TP	FP	FN	TN	Sensitivity	Precision	F-score	Sensitivity	Precision	F-score	Sensitivity	Precision	F-score	Sensitivity	Precision	F-score	Sensitivity	Precision	F-score
1	7	15	4	17	1	16	1	16	63	1	0	31	64	6	1	26	63	15	0	17	64	4	0	28	64	0.5	0.941176	0.653061	0.03125	1	0.0606061	0.1875	0.857143	0.307692	0.46875	1	0.638298	0.125	1	0.222222
2	13	15	4	23	1	21	2	11	62	1	0	31	64	11	2	21	62	15	0	17	64	4	0	28	64	0.65625	0.913043	0.763636	0.03125	1	0.0606061	0.34375	0.846154	0.488889	0.46875	1	0.638298	0.125	1	0.222222
3	13	15	6	24	1	22	2	10	62	1	0	31	64	11	2	21	62	15	0	17	64	6	0	26	64	0.6875	0.916667	0.785714	0.03125	1	0.0606061	0.34375	0.846154	0.488889	0.46875	1	0.638298	0.1875	1	0.315789
4	14	16	8	27	1	25	2	7	62	1	0	31	64	12	2	20	62	16	0	16	64	8	0	24	64	0.78125	0.925926	0.847458	0.03125	1	0.0606061	0.375	0.857143	0.521739	0.5	1	0.666667	0.25	1	0.4
5	14	16	22	32	3	28	4	4	60	3	0	29	64	12	2	20	62	16	0	16	64	20	2	12	62	0.875	0.875	0.875	0.09375	1	0.171429	0.375	0.857143	0.521739	0.5	1	0.666667	0.625	0.909091	0.740741
6	18	16	22	32	6	28	4	4	60	6	0	26	64	16	2	16	62	16	0	16	64	20	2	12	62	0.875	0.875	0.875	0.1875	1	0.315789	0.5	0.888889	0.64	0.5	1	0.666667	0.625	0.909091	0.740741
7	18	16	22	32	6	28	4	4	60	6	0	26	64	16	2	16	62	16	0	16	64	20	2	12	62	0.875	0.875	0.875	0.1875	1	0.315789	0.5	0.888889	0.64	0.5	1	0.666667	0.625	0.909091	0.740741
8	19	16	22	33	6	28	5	4	59	6	0	26	64	16	3	16	61	16	0	16	64	20	2	12	62	0.875	0.848485	0.861538	0.1875	1	0.315789	0.5	0.842105	0.627451	0.5	1	0.666667	0.625	0.909091	0.740741
9	20	16	22	33	6	28	5	4	59	6	0	26	64	17	3	15	61	16	0	16	64	20	2	12	62	0.875	0.848485	0.861538	0.1875	1	0.315789	0.53125	0.85	0.653846	0.5	1	0.666667	0.625	0.909091	0.740741
10	20	16	22	33	6	28	5	4	59	6	0	26	64	17	3	15	61	16	0	16	64	20	2	12	62	0.875	0.848485	0.861538	0.1875	1	0.315789	0.53125	0.85	0.653846	0.5	1	0.666667	0.625	0.909091	0.740741
																										Union			Intersect			KEGG			GO			OMIM
n	KEGG	GO	OMIM	Union	Intersect	TP	FP	FN	TN	TP	FP	FN	TN	TP	FP	FN	TN	TP	FP	FN	TN	TP	FP	FN	TN	Sensitivity	Precision	F-score	Sensitivity	Precision	F-score	Sensitivity	Precision	F-score	Sensitivity	Precision	F-score	Sensitivity	Precision	F-score
1	6	15	4	16	1	16	0	16	64	1	0	31	64	6	0	26	64	15	0	17	64	4	0	28	64	0.5	1	0.666667	0.03125	1	0.0606061	0.1875	1	0.315789	0.46875	1	0.638298	0.125	1	0.222222
2	10	15	4	20	1	20	0	12	64	1	0	31	64	10	0	22	64	15	0	17	64	4	0	28	64	0.625	1	0.769231	0.03125	1	0.0606061	0.3125	1	0.47619	0.46875	1	0.638298	0.125	1	0.222222
3	11	15	6	22	1	22	0	10	64	1	0	31	64	11	0	21	64	15	0	17	64	6	0	26	64	0.6875	1	0.814815	0.03125	1	0.0606061	0.34375	1	0.511628	0.46875	1	0.638298	0.1875	1	0.315789
4	12	16	8	25	1	25	0	7	64	1	0	31	64	12	0	20	64	16	0	16	64	8	0	24	64	0.78125	1	0.877193	0.03125	1	0.0606061	0.375	1	0.545455	0.5	1	0.666667	0.25	1	0.4
5	12	16	24	32	3	28	4	4	60	3	0	29	64	12	0	20	64	16	0	16	64	20	4	12	60	0.875	0.875	0.875	0.09375	1	0.171429	0.375	1	0.545455	0.5	1	0.666667	0.625	0.833333	0.714286
6	16	16	24	32	6	28	4	4	60	6	0	26	64	16	0	16	64	16	0	16	64	20	4	12	60	0.875	0.875	0.875	0.1875	1	0.315789	0.5	1	0.666667	0.5	1	0.666667	0.625	0.833333	0.714286
7	16	16	24	32	6	28	4	4	60	6	0	26	64	16	0	16	64	16	0	16	64	20	4	12	60	0.875	0.875	0.875	0.1875	1	0.315789	0.5	1	0.666667	0.5	1	0.666667	0.625	0.833333	0.714286
8	17	16	24	32	6	28	4	4	60	6	0	26	64	17	0	15	64	16	0	16	64	20	4	12	60	0.875	0.875	0.875	0.1875	1	0.315789	0.53125	1	0.693878	0.5	1	0.666667	0.625	0.833333	0.714286
9	18	16	24	33	6	28	5	4	59	6	0	26	64	17	1	15	63	16	0	16	64	20	4	12	60	0.875	0.848485	0.861538	0.1875	1	0.315789	0.53125	0.944444	0.68	0.5	1	0.666667	0.625	0.833333	0.714286
10	22	16	24	34	6	28	6	4	58	6	0	26	64	20	2	12	62	16	0	16	64	20	4	12	60	0.875	0.823529	0.848485	0.1875	1	0.315789	0.625	0.909091	0.740741	0.5	1	0.666667	0.625	0.833333	0.714286
																										Union			Intersect			KEGG			GO			OMIM
n	KEGG	GO	OMIM	Union	Intersect	TP	FP	FN	TN	TP	FP	FN	TN	TP	FP	FN	TN	TP	FP	FN	TN	TP	FP	FN	TN	Sensitivity	Precision	F-score	Sensitivity	Precision	F-score	Sensitivity	Precision	F-score	Sensitivity	Precision	F-score	Sensitivity	Precision	F-score
1	6	15	3	17	0	17	0	15	64	0	0	32	64	6	0	26	64	15	0	17	64	3	0	29	64	0.53125	1	0.693878	0	N/A	N/A	0.1875	1	0.315789	0.46875	1	0.638298	0.09375	1	0.171429
2	10	15	6	21	1	21	0	11	64	1	0	31	64	10	0	22	64	15	0	17	64	6	0	26	64	0.65625	1	0.792453	0.03125	1	0.0606061	0.3125	1	0.47619	0.46875	1	0.638298	0.1875	1	0.315789
3	11	15	6	22	1	22	0	10	64	1	0	31	64	11	0	21	64	15	0	17	64	6	0	26	64	0.6875	1	0.814815	0.03125	1	0.0606061	0.34375	1	0.511628	0.46875	1	0.638298	0.1875	1	0.315789
4	12	17	8	26	1	25	1	7	63	1	0	31	64	12	0	20	64	16	1	16	63	8	0	24	64	0.78125	0.961538	0.862069	0.03125	1	0.0606061	0.375	1	0.545455	0.5	0.941176	0.653061	0.25	1	0.4
5	12	17	20	29	3	28	1	4	63	3	0	29	64	12	0	20	64	16	1	16	63	20	0	12	64	0.875	0.965517	0.918033	0.09375	1	0.171429	0.375	1	0.545455	0.5	0.941176	0.653061	0.625	1	0.769231
6	16	17	20	29	6	28	1	4	63	6	0	26	64	16	0	16	64	16	1	16	63	20	0	12	64	0.875	0.965517	0.918033	0.1875	1	0.315789	0.5	1	0.666667	0.5	0.941176	0.653061	0.625	1	0.769231
7	16	17	20	29	6	28	1	4	63	6	0	26	64	16	0	16	64	16	1	16	63	20	0	12	64	0.875	0.965517	0.918033	0.1875	1	0.315789	0.5	1	0.666667	0.5	0.941176	0.653061	0.625	1	0.769231
8	17	17	20	29	6	28	1	4	63	6	0	26	64	17	0	15	64	16	1	16	63	20	0	12	64	0.875	0.965517	0.918033	0.1875	1	0.315789	0.53125	1	0.693878	0.5	0.941176	0.653061	0.625	1	0.769231
9	17	17	20	29	6	28	1	4	63	6	0	26	64	17	0	15	64	16	1	16	63	20	0	12	64	0.875	0.965517	0.918033	0.1875	1	0.315789	0.53125	1	0.693878	0.5	0.941176	0.653061	0.625	1	0.769231
10	17	17	20	29	6	28	1	4	63	6	0	26	64	17	0	15	64	16	1	16	63	20	0	12	64	0.875	0.965517	0.918033	0.1875	1	0.315789	0.53125	1	0.693878	0.5	0.941176	0.653061	0.625	1	0.769231
[truncated: 7 more columns]

[truncated: 10 more sheets: inbd, isch, lymp, migr, myis, neur, oste, panc, sysc, ulco]
